# Supplementary material for: Metabolic regulation of cytoskeleton functions by HDAC6-catalyzed α-tubulin lactylation
Source: Research Square preprint supplement (doi:10.21203/rs.3.rs-3917945/v1), 2024-03-19
Supplement: Supplementary file 1 [file 0b3b42746f5b8a87de9e463d.xlsx]

## Sheet: Lactic acidSites
Proteins	Positions within proteins	Leading proteins	Protein	Protein names	Gene names	Fasta headers	Localization prob	Score diff	PEP	Score	Delta score	Score for localization	Localization prob ctrl	Score diff ctrl	PEP ctrl	Score ctrl	Localization prob lac	Score diff lac	PEP lac	Score lac	Diagnostic peak	Number of Lactic acid	Amino acid	Sequence window	Modification window	Peptide window coverage	Lactic acid Probabilities	Lactic acid Score diffs	Position in peptide	Charge	Mass error [ppm]	Intensity	Intensity___1	Intensity___2	Intensity___3	Ratio mod/base	Intensity ctrl	Intensity lac	Ratio mod/base ctrl	Ratio mod/base lac	Intensity ctrl___1	Intensity ctrl___2	Intensity ctrl___3	Intensity lac___1	Intensity lac___2	Intensity lac___3	Occupancy ctrl	Occupancy ratioctrl	Occupancy error scale ctrl
A0A023T778;Q9CQL1;P61327;G3UX51;G3UZH0	18;16;16;7;14	A0A023T778	A0A023T778	Protein mago nashi homolog 2;Protein mago nashi homolog	Magohb;Magoh	tr|A0A023T778|A0A023T778_MOUSE Mago nashi protein OS=Mus musculus GN=Magohb PE=1 SV=1;sp|Q9CQL1|MGN2_MOUSE Protein mago nashi homolog 2 OS=Mus musculus GN=Magohb PE=2 SV=1;sp|P61327|MGN_MOUSE Protein mago nashi homolog OS=Mus musculus GN=Magoh PE=2 SV=1;tr	1	80.4381	0.0216654	80.438	28.651	80.438					1	80.4381	0.0216654	80.438		1	K	MGSDFYLRYYVGHKGKFGHEFLEFEFRPDGK	X;X;X;X;X;X;X;X;X;X;X;X;X;X;X;Lactic acid;X;X;X;X;X;X;X;X;X;X;X;X;X;X;X	XXXXXXXXXXXXXXPPPPPPPPPXXXXXXXX	GK(1)FGHEFLE	GK(80.44)FGHEFLE	2	2	2.3596	6763800	6763800	0	0	NaN	0	6763800	NaN	NaN	0	0	0	6763800	0	0	NaN	NaN	NaN
A0A087WPL5;E9QNN1;O70133	1165;1166;1164	A0A087WPL5	A0A087WPL5	ATP-dependent RNA helicase A	Dhx9	tr|A0A087WPL5|A0A087WPL5_MOUSE ATP-dependent RNA helicase A OS=Mus musculus GN=Dhx9 PE=1 SV=1;tr|E9QNN1|E9QNN1_MOUSE ATP-dependent RNA helicase A OS=Mus musculus GN=Dhx9 PE=1 SV=1;sp|O70133|DHX9_MOUSE ATP-dependent RNA helicase A OS=Mus musculus GN=Dhx9 PE	1	57.0193	0.0207734	57.019	18.998	57.019					1	57.0193	0.0207734	57.019		1	K	LMIGSVRYGDGPRPPKMARYDNGSGYRRGYG	X;X;X;X;X;X;X;X;X;X;X;X;X;X;X;Lactic acid;X;X;X;X;X;X;X;X;X;X;X;X;X;X;X	XXXXXXXPPPPPPPPPPPPXXXXXXXXXXXX	YGDGPRPPK(1)MAR	YGDGPRPPK(57.02)MAR	9	3	0.85527	1159100	1159100	0	0	NaN	0	1159100	NaN	NaN	0	0	0	1159100	0	0	NaN	NaN	NaN
A0A087WRY3;Q80XU3	183;184	A0A087WRY3	A0A087WRY3	Nuclear ubiquitous casein and cyclin-dependent kinase substrate 1	Nucks1	tr|A0A087WRY3|A0A087WRY3_MOUSE Nuclear ubiquitous casein and cyclin-dependent kinase substrate 1 OS=Mus musculus GN=Nucks1 PE=1 SV=1;sp|Q80XU3|NUCKS_MOUSE Nuclear ubiquitous casein and cyclin-dependent kinase substrate 1 OS=Mus musculus GN=Nucks1 PE=1 SV=1	0.89092	9.12091	0.00347092	107.15	70.759	107.15					0.89092	9.12091	0.00347092	107.15		1	K	MPKPRLKATVTPSPVKGKAKVGRPTASKKSK	X;X;X;X;X;X;X;X;X;X;X;X;X;X;X;Lactic acid;X;X;X;X;X;X;X;X;X;X;X;X;X;X;X	XXXXXXXPPPPPPPPPPPXXXXXXXXXXXXX	ATVTPSPVK(0.891)GK(0.109)	ATVTPSPVK(9.12)GK(-9.12)	9	2	0.23584	3351400	3351400	0	0	NaN	0	3351400	NaN	NaN	0	0	0	3351400	0	0	NaN	NaN	NaN
A0A087WRY3;Q80XU3	174;175	A0A087WRY3	A0A087WRY3	Nuclear ubiquitous casein and cyclin-dependent kinase substrate 1	Nucks1	tr|A0A087WRY3|A0A087WRY3_MOUSE Nuclear ubiquitous casein and cyclin-dependent kinase substrate 1 OS=Mus musculus GN=Nucks1 PE=1 SV=1;sp|Q80XU3|NUCKS_MOUSE Nuclear ubiquitous casein and cyclin-dependent kinase substrate 1 OS=Mus musculus GN=Nucks1 PE=1 SV=1	1	113.247	0.00246084	117.7	49.475	117.7					1	113.247	0.00246084	117.7		1	K	SKPERKEKKMPKPRLKATVTPSPVKGKAKVG	X;X;X;X;X;X;X;X;X;X;X;X;X;X;X;Lactic acid;X;X;X;X;X;X;X;X;Lactic acid;X;X;X;X;X;X	XXXXXXXXXXXXXXPPPPPPPPPPPXXXXXX	LK(1)ATVTPSPVK	LK(113.25)ATVTPSPVK(-113.25)	2	2	-0.1813	4308500	4308500	0	0	NaN	0	4308500	NaN	NaN	0	0	0	4308500	0	0	NaN	NaN	NaN
A0A0A0MQC7;A2A5Y6;P10637;B1AQW5;B1AQW2	455;471;455;101;94	A0A0A0MQC7;B1AQW2	B1AQW2	Microtubule-associated protein;Microtubule-associated protein tau	Mapt	tr|A0A0A0MQC7|A0A0A0MQC7_MOUSE Microtubule-associated protein OS=Mus musculus GN=Mapt PE=1 SV=1;tr|A2A5Y6|A2A5Y6_MOUSE Microtubule-associated protein OS=Mus musculus GN=Mapt PE=1 SV=1;sp|P10637|TAU_MOUSE Microtubule-associated protein tau OS=Mus musculus G	1	89.9108	2.83801e-05	147.24	129.44	89.911	1	66.2849	0.00425712	66.285	1	89.9108	2.83801e-05	147.24		1	K	GAKIATPRGAASPAQKGTSNATRIPAKTTPS	X;X;Lactic acid;X;X;X;X;X;X;X;X;X;X;X;X;Lactic acid;X;X;X;X;X;X;X;X;X;X;Lactic acid;X;X;X;X	XXXXXXXXPPPPPPPPPPPPPPPXXXXXXXX	GAASPAQK(1)GTSNATR	GAASPAQK(89.91)GTSNATR	8	3	0.89533	7698200	7698200	0	0	NaN	553100	1558500	NaN	NaN	553100	0	0	1558500	0	0	NaN	NaN	NaN
A0A0A0MQC7;A2A5Y6;P10637;B1AQW2	559;575;559;216	A0A0A0MQC7;B1AQW2	B1AQW2	Microtubule-associated protein;Microtubule-associated protein tau	Mapt	tr|A0A0A0MQC7|A0A0A0MQC7_MOUSE Microtubule-associated protein OS=Mus musculus GN=Mapt PE=1 SV=1;tr|A2A5Y6|A2A5Y6_MOUSE Microtubule-associated protein OS=Mus musculus GN=Mapt PE=1 SV=1;sp|P10637|TAU_MOUSE Microtubule-associated protein tau OS=Mus musculus G	0.99717	25.4698	0.00100902	81.311	55.989	81.311	0.99717	25.4698	0.00100902	81.311						1	K	DLKNVRSKIGSTENLKHQPGGGKVQIINKKL	X;X;Lactic acid;X;X;X;X;X;X;X;X;X;X;X;X;Lactic acid;X;X;X;X;X;X;X;X;X;X;X;X;X;X;X	XXXXXXXXPPPPPPPPPPPPPPPXXXXXXXX	IGSTENLK(0.997)HQPGGGK(0.003)	IGSTENLK(25.47)HQPGGGK(-25.47)	8	3	0.87634	2330600	2330600	0	0	NaN	2330600	0	NaN	NaN	2330600	0	0	0	0	0	NaN	NaN	NaN
A0A0A0MQC7;A2A5Y6;P10637;B1AQW5;B1AQW2	466;482;466;112;105	A0A0A0MQC7;B1AQW2	B1AQW2	Microtubule-associated protein;Microtubule-associated protein tau	Mapt	tr|A0A0A0MQC7|A0A0A0MQC7_MOUSE Microtubule-associated protein OS=Mus musculus GN=Mapt PE=1 SV=1;tr|A2A5Y6|A2A5Y6_MOUSE Microtubule-associated protein OS=Mus musculus GN=Mapt PE=1 SV=1;sp|P10637|TAU_MOUSE Microtubule-associated protein tau OS=Mus musculus G	1	97.3458	0.000900072	142.43	71.508	142.43					1	97.3458	0.000900072	142.43		1	K	SPAQKGTSNATRIPAKTTPSPKTPPGSASKQ;SPAQKGTSNATRIPAKTTPSPKTPPGSGEPP	X;X;X;X;Lactic acid;X;X;X;X;X;X;X;X;X;X;Lactic acid;X;X;X;X;X;X;X;X;X;X;X;X;X;X;X	XXXXXXXXXXXXPPPPPPPPPPXXXXXXXXX	IPAK(1)TTPSPK	IPAK(97.35)TTPSPK(-97.35)	4	2	-0.26222	14121000	14121000	0	0	NaN	0	14121000	NaN	NaN	0	0	0	14121000	0	0	NaN	NaN	NaN
A0A0A0MQC7;A2A5Y6;P10637;B1AQW2	546;562;546;203	A0A0A0MQC7;B1AQW2	B1AQW2	Microtubule-associated protein;Microtubule-associated protein tau	Mapt	tr|A0A0A0MQC7|A0A0A0MQC7_MOUSE Microtubule-associated protein OS=Mus musculus GN=Mapt PE=1 SV=1;tr|A2A5Y6|A2A5Y6_MOUSE Microtubule-associated protein OS=Mus musculus GN=Mapt PE=1 SV=1;sp|P10637|TAU_MOUSE Microtubule-associated protein tau OS=Mus musculus G	1	128.674	0.000686876	128.67	68.241	128.67	1	43.791	0.00310854	89.548	1	128.674	0.000686876	128.67		1	K	SKSRLQTAPVPMPDLKNVRSKIGSTENLKHQ	X;X;X;X;X;X;X;X;X;X;X;Oxidation (M);X;X;X;Lactic acid;X;X;X;X;Lactic acid;X;X;X;X;X;X;X;Lactic acid;X;X	XXXXPPPPPPPPPPPPPPPXXXXXXXXXXXX	LQTAPVPMPDLK(1)NVR	LQTAPVPMPDLK(128.67)NVR	12	2	0.27496	9012200	9012200	0	0	NaN	1252200	4288700	NaN	NaN	1252200	0	0	4288700	0	0	NaN	NaN	NaN
A0A0A0MQC7;A2A5Y6;P10637;B1AQW2	551;567;551;208	A0A0A0MQC7;B1AQW2	B1AQW2	Microtubule-associated protein;Microtubule-associated protein tau	Mapt	tr|A0A0A0MQC7|A0A0A0MQC7_MOUSE Microtubule-associated protein OS=Mus musculus GN=Mapt PE=1 SV=1;tr|A2A5Y6|A2A5Y6_MOUSE Microtubule-associated protein OS=Mus musculus GN=Mapt PE=1 SV=1;sp|P10637|TAU_MOUSE Microtubule-associated protein tau OS=Mus musculus G	1	105.623	0.00300184	108.98	40.997	108.98	1	105.623	0.00300184	108.98	1	84.2126	0.0121501	84.213		1	K	QTAPVPMPDLKNVRSKIGSTENLKHQPGGGK	X;X;X;X;X;X;Oxidation (M);X;X;X;Lactic acid;X;X;X;X;Lactic acid;X;X;X;X;X;X;X;Lactic acid;X;X;X;X;X;X;X	XXXXXXXXXXXXXXPPPPPPPPPPXXXXXXX	SK(1)IGSTENLK	SK(105.62)IGSTENLK(-105.62)	2	2	-0.030614	18837000	18837000	0	0	NaN	4402100	14435000	NaN	NaN	4402100	0	0	14435000	0	0	NaN	NaN	NaN
A0A0A0MQC7;A2A5Y6;P10637;B1AQW5;B1AQW2;B1AQW4	442;458;442;88;81;147	A0A0A0MQC7;B1AQW2	B1AQW2	Microtubule-associated protein;Microtubule-associated protein tau	Mapt	tr|A0A0A0MQC7|A0A0A0MQC7_MOUSE Microtubule-associated protein OS=Mus musculus GN=Mapt PE=1 SV=1;tr|A2A5Y6|A2A5Y6_MOUSE Microtubule-associated protein OS=Mus musculus GN=Mapt PE=1 SV=1;sp|P10637|TAU_MOUSE Microtubule-associated protein tau OS=Mus musculus G	1	137.135	0.00354391	137.14	99.577	137.14					1	137.135	0.00354391	137.14		1	K	NDEKKAKGADGKTGAKIATPRGAASPAQKGT;TKQMKLKGADGKTGAKIATPRGAASPAQKGT	X;X;X;X;X;X;X;X;X;X;X;X;X;X;X;Lactic acid;X;X;X;X;X;X;X;X;X;X;X;X;Lactic acid;X;X	XXXXXXXXXXXXPPPPPPPPPXXXXXXXXXX	TGAK(1)IATPR	TGAK(137.14)IATPR	4	2	-0.64217	12321000	12321000	0	0	NaN	0	12321000	NaN	NaN	0	0	0	12321000	0	0	NaN	NaN	NaN
A0A0A0MQC7;A2A5Y6;P10637;B1AQW2	645;661;645;302	A0A0A0MQC7;B1AQW2	B1AQW2	Microtubule-associated protein;Microtubule-associated protein tau	Mapt	tr|A0A0A0MQC7|A0A0A0MQC7_MOUSE Microtubule-associated protein OS=Mus musculus GN=Mapt PE=1 SV=1;tr|A2A5Y6|A2A5Y6_MOUSE Microtubule-associated protein OS=Mus musculus GN=Mapt PE=1 SV=1;sp|P10637|TAU_MOUSE Microtubule-associated protein tau OS=Mus musculus G	1	100.903	7.06054e-08	112.55	97.855	112.55	1	74.4202	7.55936e-07	86.8	1	100.903	7.06054e-08	112.55		1	K	EVKSEKLDFKDRVQSKIGSLDNITHVPGGGN	X;X;X;X;X;X;X;X;X;X;X;X;X;X;X;Lactic acid;X;X;X;X;X;X;X;X;X;X;X;X;X;X;X	XXXXXXXXXXXXPPPPPPPPPPPPPPPPPPP	VQSK(1)IGSLDNITHVPGGGNK	VQSK(100.9)IGSLDNITHVPGGGNK(-100.9)	4	3	0.10839	59732000	59732000	0	0	NaN	10658000	49074000	NaN	NaN	10658000	0	0	49074000	0	0	NaN	NaN	NaN
A0A0A0MQC7;A2A5Y6;P10637;B1AQW2	613;629;613;270	A0A0A0MQC7;B1AQW2	B1AQW2	Microtubule-associated protein;Microtubule-associated protein tau	Mapt	tr|A0A0A0MQC7|A0A0A0MQC7_MOUSE Microtubule-associated protein OS=Mus musculus GN=Mapt PE=1 SV=1;tr|A2A5Y6|A2A5Y6_MOUSE Microtubule-associated protein OS=Mus musculus GN=Mapt PE=1 SV=1;sp|P10637|TAU_MOUSE Microtubule-associated protein tau OS=Mus musculus G	0.999998	56.2477	2.33894e-07	91.637	76.002	91.637					0.999998	56.2477	2.33894e-07	91.637		1	K	VQIVYKPVDLSKVTSKCGSLGNIHHKPGGGQ	X;X;X;X;X;X;X;X;X;X;X;X;X;X;X;Lactic acid;X;X;X;X;X;X;X;X;X;X;X;X;X;X;X	XXXXXXXXXXXXPPPPPPPPPPPPPPPPPPP	VTSK(1)CGSLGNIHHKPGGGQVE	VTSK(56.25)CGSLGNIHHK(-56.25)PGGGQVE	4	3	0.081891	7391800	7391800	0	0	NaN	0	7391800	NaN	NaN	0	0	0	7391800	0	0	NaN	NaN	NaN
A0A0A0MQF6;P16858;S4R257;S4R1W1	239;213;170;213	A0A0A0MQF6	A0A0A0MQF6	Glyceraldehyde-3-phosphate dehydrogenase	Gapdh;Gm3839	tr|A0A0A0MQF6|A0A0A0MQF6_MOUSE Glyceraldehyde-3-phosphate dehydrogenase OS=Mus musculus GN=Gapdh PE=1 SV=1;sp|P16858|G3P_MOUSE Glyceraldehyde-3-phosphate dehydrogenase OS=Mus musculus GN=Gapdh PE=1 SV=2;tr|S4R257|S4R257_MOUSE Glyceraldehyde-3-phosphate deh	0.643182	2.55888	0.0284969	40.616	28.461	40.616					0.643182	2.55888	0.0284969	40.616		1	K	RGAAQNIIPASTGAAKAVGKVIPELNGKLTG	X;X;X;X;X;X;X;X;X;X;X;X;X;X;X;Lactic acid;X;X;X;X;X;X;X;X;X;X;X;X;X;X;X	XPPPPPPPPPPPPPPPPPPPXXXXXXXXXXX	GAAQNIIPASTGAAK(0.643)AVGK(0.357)	GAAQNIIPASTGAAK(2.56)AVGK(-2.56)	15	3	-1.0064	895010	895010	0	0	NaN	0	895010	NaN	NaN	0	0	0	895010	0	0	NaN	NaN	NaN
A0A0A0MQF6;P16858;S4R257;S4R1W1;D3YYI5;V9GXA7	218;192;149;192;195;62	A0A0A0MQF6	A0A0A0MQF6	Glyceraldehyde-3-phosphate dehydrogenase	Gapdh;Gm3839;Gm7293;Gm15294	tr|A0A0A0MQF6|A0A0A0MQF6_MOUSE Glyceraldehyde-3-phosphate dehydrogenase OS=Mus musculus GN=Gapdh PE=1 SV=1;sp|P16858|G3P_MOUSE Glyceraldehyde-3-phosphate dehydrogenase OS=Mus musculus GN=Gapdh PE=1 SV=2;tr|S4R257|S4R257_MOUSE Glyceraldehyde-3-phosphate deh	1	131.439	0.00100539	131.44	84.548	131.44					1	131.439	0.00100539	131.44		1	K	HAITATQKTVDGPSGKLWRDGRGAAQNIIPA	X;X;X;X;X;X;X;X;X;X;X;X;X;X;X;Lactic acid;X;X;X;X;X;X;X;X;X;X;X;X;X;X;X	XXXXXXXXPPPPPPPPPPPXXXXXXXXXXXX	TVDGPSGK(1)LWR	TVDGPSGK(131.44)LWR	8	2	-0.28687	3584800	3584800	0	0	NaN	0	3584800	NaN	NaN	0	0	0	3584800	0	0	NaN	NaN	NaN
A0A0G2JDV8;Q9DAW9	6;6	A0A0G2JDV8	A0A0G2JDV8	Calponin-3	Cnn3	tr|A0A0G2JDV8|A0A0G2JDV8_MOUSE Calponin OS=Mus musculus GN=Cnn3 PE=1 SV=1;sp|Q9DAW9|CNN3_MOUSE Calponin-3 OS=Mus musculus GN=Cnn3 PE=1 SV=1	1	90.6853	0.000197387	90.685	65.894	90.685					1	90.6853	0.000197387	90.685		1	K	__________MTHFNKGPSYGLSAEVKNKIA	X;X;X;X;X;X;X;X;X;X;X;X;X;X;X;Lactic acid;X;X;X;X;X;X;X;X;X;X;X;X;X;X;X	XXXXXXXXXXXPPPPPPPPPPPPPPXXXXXX	THFNK(1)GPSYGLSAE	THFNK(90.69)GPSYGLSAE	5	2	-0.84605	1007600	1007600	0	0	NaN	0	1007600	NaN	NaN	0	0	0	1007600	0	0	NaN	NaN	NaN
A6PWK8;Q3UY26;Q8C2S3;A0A0G2JFA5;F6RDB7;Q61687	220;236;274;258;274;313	A6PWK8	A6PWK8	Transcriptional regulator ATRX	Atrx	tr|A6PWK8|A6PWK8_MOUSE Transcriptional regulator ATRX (Fragment) OS=Mus musculus GN=Atrx PE=1 SV=2;tr|Q3UY26|Q3UY26_MOUSE Transcriptional regulator ATRX (Fragment) OS=Mus musculus GN=Atrx PE=1 SV=1;tr|Q8C2S3|Q8C2S3_MOUSE Transcriptional regulator ATRX (Fra	0.999165	30.779	0.00346233	107.24	78.157	107.24					0.999165	30.779	0.00346233	107.24		1	K	KVDSEKTSKVCDQTSKFSPKKSSSSCNGEEK	X;X;X;X;X;X;X;X;X;X;X;X;X;X;X;Lactic acid;X;X;X;X;X;X;X;X;X;X;X;X;X;X;X	XXXXXXXXXPPPPPPPPPPPXXXXXXXXXXX	VCDQTSK(0.999)FSPK(0.001)	VCDQTSK(30.78)FSPK(-30.78)	7	2	0.38243	2454800	2454800	0	0	NaN	0	2454800	NaN	NaN	0	0	0	2454800	0	0	NaN	NaN	NaN
A0A0G2JGQ5;A0A0G2JG10;Q497W9;O35286	17;17;17;17	A0A0G2JGQ5	A0A0G2JGQ5	Pre-mRNA-splicing factor ATP-dependent RNA helicase DHX15	Dhx15	tr|A0A0G2JGQ5|A0A0G2JGQ5_MOUSE Pre-mRNA-splicing factor ATP-dependent RNA helicase DHX15 (Fragment) OS=Mus musculus GN=Dhx15 PE=1 SV=1;tr|A0A0G2JG10|A0A0G2JG10_MOUSE Pre-mRNA-splicing factor ATP-dependent RNA helicase DHX15 OS=Mus musculus GN=Dhx15 PE=1 SV	0.88716	8.95539	0.001913	115.57	60.592	115.57	0.5	0	0.0329733	66.595	0.88716	8.95539	0.001913	115.57		1	K	SKRHRLDLGEDYPSGKKRAGTDGYMTDGMLL	X;X;X;X;X;X;X;X;X;X;X;X;X;X;X;Lactic acid;X;X;X;X;X;X;X;X;X;X;X;X;X;X;X	XXXXXPPPPPPPPPPPPXXXXXXXXXXXXXX	LDLGEDYPSGK(0.887)K(0.113)	LDLGEDYPSGK(8.96)K(-8.96)	11	2	0.24429	6185300	6185300	0	0	NaN	783880	5401400	NaN	NaN	783880	0	0	5401400	0	0	NaN	NaN	NaN
A0A0G2JGQ5;A0A0G2JG10;Q497W9;O35286	18;18;18;18	A0A0G2JGQ5	A0A0G2JGQ5	Pre-mRNA-splicing factor ATP-dependent RNA helicase DHX15	Dhx15	tr|A0A0G2JGQ5|A0A0G2JGQ5_MOUSE Pre-mRNA-splicing factor ATP-dependent RNA helicase DHX15 (Fragment) OS=Mus musculus GN=Dhx15 PE=1 SV=1;tr|A0A0G2JG10|A0A0G2JG10_MOUSE Pre-mRNA-splicing factor ATP-dependent RNA helicase DHX15 OS=Mus musculus GN=Dhx15 PE=1 SV	0.5	0	0.0329733	66.595	27.574	66.595	0.5	0	0.0329733	66.595						1	K	KRHRLDLGEDYPSGKKRAGTDGYMTDGMLLR	X;X;X;X;X;X;X;X;X;X;X;X;X;X;X;X;X;X;X;X;X;X;X;X;X;X;X;X;X;X;X	XXXXXXXXXXXXXXXXXXXXXXXXXXXXXXX	LDLGEDYPSGK(0.5)K(0.5)	LDLGEDYPSGK(0)K(0)	12	2	-0.10888	783880	783880	0	0	NaN	783880	0	NaN	NaN	783880	0	0	0	0	0	NaN	NaN	NaN
A0A0J9YUS5;E9PVC6;E9Q9E1;E9PVC5;Q6NZJ6	778;1028;1068;1069;1075	A0A0J9YUS5	A0A0J9YUS5	Eukaryotic translation initiation factor 4 gamma 1	Eif4g1	tr|A0A0J9YUS5|A0A0J9YUS5_MOUSE Eukaryotic translation initiation factor 4 gamma 1 OS=Mus musculus GN=Eif4g1 PE=1 SV=1;tr|E9PVC6|E9PVC6_MOUSE Eukaryotic translation initiation factor 4 gamma 1 OS=Mus musculus GN=Eif4g1 PE=1 SV=1;tr|E9Q9E1|E9Q9E1_MOUSE Eukar	0.990403	20.1369	0.00560342	48.315	40.418	48.315					0.990403	20.1369	0.00560342	48.315		1	K	PISKGSRPIDTSRLTKITKPGSIDSNNQLFA	X;X;X;X;X;X;X;X;X;X;X;X;X;X;X;Lactic acid;X;X;X;X;X;X;X;X;X;X;X;X;X;X;X	XXXXXXXXXXXXXPPPPPPPPPPPPPPPPPP	LTK(0.99)ITK(0.01)PGSIDSNNQLFAPGGR	LTK(20.14)ITK(-20.14)PGSIDSNNQLFAPGGR	3	3	0.87872	2006000	2006000	0	0	NaN	0	2006000	NaN	NaN	0	0	0	2006000	0	0	NaN	NaN	NaN
P70288;A0A0R4J008	481;481	P70288	P70288	Histone deacetylase 2	Hdac2	sp|P70288|HDAC2_MOUSE Histone deacetylase 2 OS=Mus musculus GN=Hdac2 PE=1 SV=1;tr|A0A0R4J008|A0A0R4J008_MOUSE Histone deacetylase OS=Mus musculus GN=Hdac2 PE=1 SV=1	1	109.012	0.00299912	109.01	78.846	109.01					1	109.012	0.00299912	109.01		1	K	KSKDNSGEKTDPKGAKSEQLSNP________	X;X;X;X;X;X;X;X;X;X;X;X;X;X;X;Lactic acid;X;X;X;X;X;X;X;X;X;X;X;X;X;X;X	XXXXXXXXXXXXXPPPPPPPPPPXXXXXXXX	GAK(1)SEQLSNP	GAK(109.01)SEQLSNP	3	2	-0.57708	6395000	6395000	0	0	NaN	0	6395000	NaN	NaN	0	0	0	6395000	0	0	NaN	NaN	NaN
J3QQ08;A2ALV1;Q8BXU5;A0A0R4J0B8;A2ALV3;Q62421;Q62420;Q62419	8;8;8;8;8;8;8;8	J3QQ08	J3QQ08	Endophilin-A3;Endophilin-A1;Endophilin-A2	Sh3gl3;Sh3gl2;Sh3gl1	tr|J3QQ08|J3QQ08_MOUSE Endophilin-A3 OS=Mus musculus GN=Sh3gl3 PE=1 SV=1;tr|A2ALV1|A2ALV1_MOUSE Endophilin-A1 OS=Mus musculus GN=Sh3gl2 PE=1 SV=1;tr|Q8BXU5|Q8BXU5_MOUSE Endophilin-A1 OS=Mus musculus GN=Sh3gl2 PE=1 SV=1;tr|A0A0R4J0B8|A0A0R4J0B8_MOUSE Endoph	0.585387	1.49801	0.0263432	43	11.711	43					0.585387	1.49801	0.0263432	43		1	K	________MSVAGLKKQFHKASQLFSEKISG	X;X;X;X;X;X;X;X;X;X;X;X;X;X;X;Lactic acid;X;X;X;X;X;X;X;X;X;X;X;X;X;X;X	XXXXXXXXXPPPPPPPXXXXXXXXXXXXXXX	SVAGLK(0.415)K(0.585)	SVAGLK(-1.5)K(1.5)	7	2	-1.6869	965620	965620	0	0	NaN	0	965620	NaN	NaN	0	0	0	965620	0	0	NaN	NaN	NaN
A0A0R4J1E1;Q99PV8	415;609	A0A0R4J1E1	A0A0R4J1E1	B-cell lymphoma/leukemia 11B	Bcl11b	tr|A0A0R4J1E1|A0A0R4J1E1_MOUSE B-cell lymphoma/leukemia 11B OS=Mus musculus GN=Bcl11b PE=1 SV=1;sp|Q99PV8|BC11B_MOUSE B-cell lymphoma/leukemia 11B OS=Mus musculus GN=Bcl11b PE=1 SV=1	1	84.5074	0.00527772	84.507	46.421	84.507					1	84.5074	0.00527772	84.507		1	K	VMEDAGLGALPQYGEKRGAFLKRAGDTGDAG	X;X;X;X;X;X;X;X;X;X;X;X;X;X;X;Lactic acid;X;X;X;X;X;X;X;X;X;X;X;X;X;X;X	XXXPPPPPPPPPPPPPPXXXXXXXXXXXXXX	DAGLGALPQYGEK(1)R	DAGLGALPQYGEK(84.51)R	13	2	1.0904	1161700	1161700	0	0	NaN	0	1161700	NaN	NaN	0	0	0	1161700	0	0	NaN	NaN	NaN
G3X8W7;A0A0R4J1W7;Q8BGZ4	147;147;147	G3X8W7	G3X8W7	Cell division cycle protein 23 homolog	Cdc23	tr|G3X8W7|G3X8W7_MOUSE CDC23 (Cell division cycle 23, yeast, homolog), isoform CRA_a OS=Mus musculus GN=Cdc23 PE=1 SV=1;tr|A0A0R4J1W7|A0A0R4J1W7_MOUSE CDC23 (Cell division cycle 23, yeast, homolog), isoform CRA_c OS=Mus musculus GN=Cdc23 PE=1 SV=1;sp|Q8BGZ	1	79.5969	0.0223422	79.597	14.559	79.597					1	79.5969	0.0223422	79.597		1	K	DETVDSLGPLEKGQVKNEALRELRVELSRKH	X;X;X;X;X;X;X;X;X;X;X;X;X;X;X;Lactic acid;X;X;X;X;X;X;X;X;X;X;X;X;X;X;X	XXXXXXXXXXXXPPPPPPPPPXXXXXXXXXX	GQVK(1)NEALR	GQVK(79.6)NEALR	4	2	0.26052	22847000	22847000	0	0	NaN	0	22847000	NaN	NaN	0	0	0	22847000	0	0	NaN	NaN	NaN
A0A0U1RPJ7;D3YVR9;Q9R0P4	47;47;91	A0A0U1RPJ7	A0A0U1RPJ7	Small acidic protein	1110004F10Rik;Smap	tr|A0A0U1RPJ7|A0A0U1RPJ7_MOUSE Protein 1110004F10Rik (Fragment) OS=Mus musculus GN=1110004F10Rik PE=1 SV=1;tr|D3YVR9|D3YVR9_MOUSE MCG7316, isoform CRA_b OS=Mus musculus GN=1110004F10Rik PE=1 SV=1;sp|Q9R0P4|SMAP_MOUSE Small acidic protein OS=Mus musculus GN	1	79.7711	0.000119172	136.38	121.69	79.771					1	79.7711	0.000119172	136.38		1	K	INEELESQYQQSMDSKLSGRYRRHCGLGF__	X;X;X;X;X;X;X;X;X;X;X;X;Oxidation (M);X;X;Lactic acid;X;X;X;X;X;X;X;X;X;X;X;X;X;X;X	XXXXPPPPPPPPPPPPPPPPXXXXXXXXXXX	SQYQQSMDSK(1)LSGR	SQYQQSMDSK(79.77)LSGR	10	3	-0.21546	25849000	25849000	0	0	NaN	0	1147000	NaN	NaN	0	0	0	1147000	0	0	NaN	NaN	NaN
A0A0U1RPJ7;D3YVR9;Q9R0P4;D6RI64	18;18;62;62	A0A0U1RPJ7;D6RI64	A0A0U1RPJ7	Small acidic protein	1110004F10Rik;Smap	tr|A0A0U1RPJ7|A0A0U1RPJ7_MOUSE Protein 1110004F10Rik (Fragment) OS=Mus musculus GN=1110004F10Rik PE=1 SV=1;tr|D3YVR9|D3YVR9_MOUSE MCG7316, isoform CRA_b OS=Mus musculus GN=1110004F10Rik PE=1 SV=1;sp|Q9R0P4|SMAP_MOUSE Small acidic protein OS=Mus musculus GN	1	89.9589	0.00134887	89.959	62.097	89.959					1	89.9589	0.00134887	89.959		1	K	AGKKEHTGRLVIGDHKSTSHFRTGEEDKKIN;AGKKEHTGRLVIGDHKSTSHFRTVQWTRRGR	X;X;X;X;X;X;X;X;X;X;X;X;X;X;X;Lactic acid;X;X;X;X;X;X;X;X;X;X;X;X;X;X;X	XXXXXXXXXPPPPPPPPPPPPPXXXXXXXXX	LVIGDHK(1)STSHFR	LVIGDHK(89.96)STSHFR	7	3	-0.0027495	14092000	14092000	0	0	NaN	0	10740000	NaN	NaN	0	0	0	10740000	0	0	NaN	NaN	NaN
A0A1B0GR11;Q93092	7;7	A0A1B0GR11	A0A1B0GR11	Transaldolase	Taldo1	tr|A0A1B0GR11|A0A1B0GR11_MOUSE Transaldolase OS=Mus musculus GN=Taldo1 PE=4 SV=1;sp|Q93092|TALDO_MOUSE Transaldolase OS=Mus musculus GN=Taldo1 PE=1 SV=2	1	56.0908	0.0153625	56.091	20.89	56.091					1	56.0908	0.0153625	56.091		1	K	_________MSGSPVKRQRMESALDQLKQFT	X;X;X;X;X;X;X;X;X;X;X;X;X;X;X;Lactic acid;X;X;X;X;X;X;X;X;X;X;X;X;X;X;X	XXXXXXXXXXPPPPPPPXXXXXXXXXXXXXX	SGSPVK(1)R	SGSPVK(56.09)R	6	2	0.57768	2021200	2021200	0	0	NaN	0	2021200	NaN	NaN	0	0	0	2021200	0	0	NaN	NaN	NaN
A0A1B0GT61;A0A1B0GSW3;E9Q7G0;A0A1B0GT38;A0A1B0GSH2	174;174;174;174;147	A0A1B0GT61	A0A1B0GT61		Numa1	tr|A0A1B0GT61|A0A1B0GT61_MOUSE Protein Numa1 (Fragment) OS=Mus musculus GN=Numa1 PE=4 SV=1;tr|A0A1B0GSW3|A0A1B0GSW3_MOUSE Protein Numa1 (Fragment) OS=Mus musculus GN=Numa1 PE=4 SV=1;tr|E9Q7G0|E9Q7G0_MOUSE Protein Numa1 OS=Mus musculus GN=Numa1 PE=1 SV=1;tr	1	69.0102	0.00327273	69.01	44.667	69.01					1	69.0102	0.00327273	69.01		1	K	ASTLSEELSPPSHQTKRKIRFLEIQRIASSS	X;X;X;X;X;X;X;X;X;X;X;X;X;X;X;Lactic acid;X;X;X;X;X;X;X;X;X;X;X;X;X;X;X	XXXXXXXPPPPPPPPPPXXXXXXXXXXXXXX	LSPPSHQTK(1)R	LSPPSHQTK(69.01)R	9	3	-0.55024	1315700	1315700	0	0	NaN	0	1315700	NaN	NaN	0	0	0	1315700	0	0	NaN	NaN	NaN
A0A1B0GT89;Q9QXV3	54;148	A0A1B0GT89	A0A1B0GT89	Inhibitor of growth protein 1	Ing1	tr|A0A1B0GT89|A0A1B0GT89_MOUSE Inhibitor of growth protein 1 (Fragment) OS=Mus musculus GN=Ing1 PE=4 SV=1;sp|Q9QXV3|ING1_MOUSE Inhibitor of growth protein 1 OS=Mus musculus GN=Ing1 PE=2 SV=1	0.8801	8.65711	0.00124696	71.548	52.337	71.548					0.8801	8.65711	0.00124696	71.548		1	K	KSKSEAITQADKPNNKRSRRQRNNENRENAS	X;X;X;X;X;X;X;X;X;X;X;X;X;X;X;Lactic acid;X;X;X;X;X;X;X;X;X;X;X;X;X;X;X	XXXPPPPPPPPPPPPPPXXXXXXXXXXXXXX	SEAITQADK(0.12)PNNK(0.88)R	SEAITQADK(-8.66)PNNK(8.66)R	13	3	-0.087566	1473400	1473400	0	0	NaN	0	1473400	NaN	NaN	0	0	0	1473400	0	0	NaN	NaN	NaN
A0A1B0GX25;Q9Z2V5	896;896	A0A1B0GX25	A0A1B0GX25	Histone deacetylase 6	Hdac6	tr|A0A1B0GX25|A0A1B0GX25_MOUSE Histone deacetylase 6 (Fragment) OS=Mus musculus GN=Hdac6 PE=1 SV=1;sp|Q9Z2V5|HDAC6_MOUSE Histone deacetylase 6 OS=Mus musculus GN=Hdac6 PE=1 SV=3	0.734256	4.41384	0.0027576	112.11	43.725	112.11					0.734256	4.41384	0.0027576	112.11		1	K	TIAALPGKESTLGQAKSKMAKAVLAQGQSSE	X;X;X;X;X;X;X;Lactic acid;X;X;X;X;X;X;X;Lactic acid;X;X;X;X;Lactic acid;X;X;X;X;X;X;X;X;X;X	XXXXXXXXPPPPPPPPPPXXXXXXXXXXXXX	ESTLGQAK(0.734)SK(0.266)	ESTLGQAK(4.41)SK(-4.41)	8	2	0.003236	10281000	10281000	0	0	NaN	0	10281000	NaN	NaN	0	0	0	10281000	0	0	NaN	NaN	NaN
A0A1B0GX25;Q9Z2V5	901;901	A0A1B0GX25	A0A1B0GX25	Histone deacetylase 6	Hdac6	tr|A0A1B0GX25|A0A1B0GX25_MOUSE Histone deacetylase 6 (Fragment) OS=Mus musculus GN=Hdac6 PE=1 SV=1;sp|Q9Z2V5|HDAC6_MOUSE Histone deacetylase 6 OS=Mus musculus GN=Hdac6 PE=1 SV=3	1	101.381	2.88288e-05	101.39	77.554	101.39					1	101.381	2.88288e-05	101.39		1	K	PGKESTLGQAKSKMAKAVLAQGQSSEQAAKG	X;X;Lactic acid;X;X;X;X;X;X;X;Lactic acid;X;X;X;X;Lactic acid;X;X;X;X;X;X;X;X;X;X;X;X;X;Lactic acid;X	XXXXXXXXXXXXXPPPPPPPPPPPPPPPPPX	MAK(1)AVLAQGQSSEQAAK	MAK(101.38)AVLAQGQSSEQAAK(-101.38)	3	3	0.2314	2357200	2357200	0	0	NaN	0	1863100	NaN	NaN	0	0	0	1863100	0	0	NaN	NaN	NaN
A0A1B0GX25;Q9Z2V5	915;915	A0A1B0GX25	A0A1B0GX25	Histone deacetylase 6	Hdac6	tr|A0A1B0GX25|A0A1B0GX25_MOUSE Histone deacetylase 6 (Fragment) OS=Mus musculus GN=Hdac6 PE=1 SV=1;sp|Q9Z2V5|HDAC6_MOUSE Histone deacetylase 6 OS=Mus musculus GN=Hdac6 PE=1 SV=3	1	104.118	0.00069124	132.32	102.58	132.32					1	104.118	0.00069124	132.32		1	K	AKAVLAQGQSSEQAAKGTTLDLATSKETVGG	X;X;X;X;X;X;X;X;X;X;X;X;X;X;X;Lactic acid;X;X;X;X;X;X;X;X;X;X;X;X;X;X;X	XXXXXXXXXXXXPPPPPPPPPPPPPPXXXXX	QAAK(1)GTTLDLATSK	QAAK(104.12)GTTLDLATSK(-104.12)	4	2	0.22678	1929600	1929600	0	0	NaN	0	1929600	NaN	NaN	0	0	0	1929600	0	0	NaN	NaN	NaN
A0A1B0GX25;Q9Z2V5	888;888	A0A1B0GX25	A0A1B0GX25	Histone deacetylase 6	Hdac6	tr|A0A1B0GX25|A0A1B0GX25_MOUSE Histone deacetylase 6 (Fragment) OS=Mus musculus GN=Hdac6 PE=1 SV=1;sp|Q9Z2V5|HDAC6_MOUSE Histone deacetylase 6 OS=Mus musculus GN=Hdac6 PE=1 SV=3	1	87.1812	0.00648269	87.181	30.634	87.181					1	87.1812	0.00648269	87.181		1	K	VPEESVRKTIAALPGKESTLGQAKSKMAKAV	X;X;X;X;X;X;X;X;X;X;X;X;X;X;X;Lactic acid;X;X;X;X;X;X;X;Lactic acid;X;X;X;X;Lactic acid;X;X	XXXXXXXXPPPPPPPPPXXXXXXXXXXXXXX	TIAALPGK(1)E	TIAALPGK(87.18)E	8	2	0.14602	2867100	2867100	0	0	NaN	0	2867100	NaN	NaN	0	0	0	2867100	0	0	NaN	NaN	NaN
A1L3S7;Q8VHR5	66;66	A1L3S7	A1L3S7	Transcriptional repressor p66-beta	Gatad2b	tr|A1L3S7|A1L3S7_MOUSE Gatad2b protein OS=Mus musculus GN=Gatad2b PE=1 SV=1;sp|Q8VHR5|P66B_MOUSE Transcriptional repressor p66-beta OS=Mus musculus GN=Gatad2b PE=1 SV=1	0.961832	14.014	1.16367e-07	87.772	57.088	87.772					0.961832	14.014	1.16367e-07	87.772		1	K	RKDLANLEVPHELPTKQDGSGVKGYEEKLNG	X;X;X;X;X;X;X;X;X;X;X;X;X;X;X;Lactic acid;X;X;X;X;X;X;X;X;X;X;X;X;X;X;X	XXPPPPPPPPPPPPPPPPPPPPPXXXXXXXX	DLANLEVPHELPTK(0.962)QDGSGVK(0.038)	DLANLEVPHELPTK(14.01)QDGSGVK(-14.01)	14	3	0.079639	1352600	1352600	0	0	NaN	0	1352600	NaN	NaN	0	0	0	1352600	0	0	NaN	NaN	NaN
A1L3S7;Q8VHR5	98;98	A1L3S7	A1L3S7	Transcriptional repressor p66-beta	Gatad2b	tr|A1L3S7|A1L3S7_MOUSE Gatad2b protein OS=Mus musculus GN=Gatad2b PE=1 SV=1;sp|Q8VHR5|P66B_MOUSE Transcriptional repressor p66-beta OS=Mus musculus GN=Gatad2b PE=1 SV=1	1	68.4896	9.32089e-05	68.49	59.443	68.49					1	68.4896	9.32089e-05	68.49		1	K	LRPHGDNNRTAGRPGKENINDEPVDMSARRS	X;X;X;X;X;X;X;X;X;X;X;X;X;X;X;Lactic acid;X;X;X;X;X;X;X;X;X;X;X;X;X;X;X	XXXXXXXXXPPPPPPPPPPPPPPPPPPPPXX	TAGRPGK(1)ENINDEPVDMSAR	TAGRPGK(68.49)ENINDEPVDMSAR	7	3	-0.1587	1341700	1341700	0	0	NaN	0	1341700	NaN	NaN	0	0	0	1341700	0	0	NaN	NaN	NaN
A2A482;A2A484;Q3UH28;Q3U1M7;A2A483;E9Q8D1	1136;1165;1084;1104;1109;1129	A2A482	A2A482		Zmynd8	tr|A2A482|A2A482_MOUSE Protein Zmynd8 OS=Mus musculus GN=Zmynd8 PE=1 SV=1;tr|A2A484|A2A484_MOUSE Protein Zmynd8 OS=Mus musculus GN=Zmynd8 PE=1 SV=1;tr|Q3UH28|Q3UH28_MOUSE Protein Zmynd8 OS=Mus musculus GN=Zmynd8 PE=1 SV=1;tr|Q3U1M7|Q3U1M7_MOUSE Protein Zmy	0.999994	52.472	0.00055337	52.483	45.065	52.483					0.999994	52.472	0.00055337	52.483		1	K	MLLGSNQSSVSKRCDKQPAYTPTTTDHQPHP	X;X;X;X;X;X;X;X;X;X;X;X;X;X;X;Lactic acid;X;X;X;X;X;X;X;X;X;X;X;X;X;X;X	XXXXXXXXXXXXXPPPPPPPPPPPPPPPPPP	CDK(1)QPAYTPTTTDHQPHPNYPAQK	CDK(52.47)QPAYTPTTTDHQPHPNYPAQK(-52.47)	3	4	0.84666	2813500	2813500	0	0	NaN	0	2813500	NaN	NaN	0	0	0	2813500	0	0	NaN	NaN	NaN
A2A482;A2A484	855;884	A2A482	A2A482		Zmynd8	tr|A2A482|A2A482_MOUSE Protein Zmynd8 OS=Mus musculus GN=Zmynd8 PE=1 SV=1;tr|A2A484|A2A484_MOUSE Protein Zmynd8 OS=Mus musculus GN=Zmynd8 PE=1 SV=1	1	90.1173	0.00603742	120.62	77.707	120.62					1	90.1173	0.00603742	120.62		1	K	PQSSQGTRYQTRQAVKAVQQKEVTQSPSTST	X;X;X;X;X;X;X;X;X;X;X;X;X;X;X;Lactic acid;X;X;X;X;X;X;X;X;X;X;X;X;X;X;X	XXXXXXXXXXXXPPPPPPPPPXXXXXXXXXX	QAVK(1)AVQQK	QAVK(90.12)AVQQK(-90.12)	4	2	-0.015905	1845800	1845800	0	0	NaN	0	1845800	NaN	NaN	0	0	0	1845800	0	0	NaN	NaN	NaN
A2ADB1;A2ADB0;Q62504	1984;2007;2006	A2ADB1	A2ADB1	Msx2-interacting protein	Spen	tr|A2ADB1|A2ADB1_MOUSE Msx2-interacting protein OS=Mus musculus GN=Spen PE=1 SV=1;tr|A2ADB0|A2ADB0_MOUSE Msx2-interacting protein OS=Mus musculus GN=Spen PE=1 SV=1;sp|Q62504|MINT_MOUSE Msx2-interacting protein OS=Mus musculus GN=Spen PE=1 SV=2	1	74.4827	0.00929587	84.17	55.083	84.17					1	74.4827	0.00929587	84.17		1	K	ETPRPAEGWRSPRSQKSAAAAGPQGKRGRNE	X;X;X;X;X;X;X;X;X;X;X;X;X;X;X;Lactic acid;X;X;X;X;X;X;X;X;X;X;X;X;X;X;X	XXXXXXXXXXXXXPPPPPPPPPPPPPXXXXX	SQK(1)SAAAAGPQGK	SQK(74.48)SAAAAGPQGK(-74.48)	3	2	-0.073765	480160	480160	0	0	NaN	0	480160	NaN	NaN	0	0	0	480160	0	0	NaN	NaN	NaN
A2ALF0;A2ALF3;Q6NZB0	199;214;233	A2ALF0	A2ALF0	DnaJ homolog subfamily C member 8	Dnajc8	tr|A2ALF0|A2ALF0_MOUSE DnaJ homolog subfamily C member 8 OS=Mus musculus GN=Dnajc8 PE=1 SV=1;tr|A2ALF3|A2ALF3_MOUSE DnaJ homolog subfamily C member 8 OS=Mus musculus GN=Dnajc8 PE=1 SV=1;sp|Q6NZB0|DNJC8_MOUSE DnaJ homolog subfamily C member 8 OS=Mus musculu	0.744789	4.65135	0.00760619	111.01	74.421	111.01					0.744789	4.65135	0.00760619	111.01		1	K	GRVDSWRNFQANTKGKKEKKNRTFLRPPKVK	X;X;X;X;X;X;X;X;X;X;X;X;X;X;X;Lactic acid;X;X;X;X;X;X;X;X;X;X;X;X;X;X;X	XXXXXXXPPPPPPPPPXXXXXXXXXXXXXXX	NFQANTK(0.255)GK(0.745)	NFQANTK(-4.65)GK(4.65)	9	2	0.037934	2511500	2511500	0	0	NaN	0	2511500	NaN	NaN	0	0	0	2511500	0	0	NaN	NaN	NaN
A2AP40;Q8JZX4	41;41	A2AP40	A2AP40	Splicing factor 45	Rbm17	tr|A2AP40|A2AP40_MOUSE Splicing factor 45 (Fragment) OS=Mus musculus GN=Rbm17 PE=1 SV=1;sp|Q8JZX4|SPF45_MOUSE Splicing factor 45 OS=Mus musculus GN=Rbm17 PE=1 SV=1	1	96.665	0.00489863	96.665	59.506	96.665					1	96.665	0.00489863	96.665			K	LQSQLQVKKAALTQAKSQRTKQSTVLAPVID	X;X;X;X;X;X;X;X;X;X;X;X;X;X;X;Lactic acid;X;X;X;X;X;X;X;X;X;X;X;X;X;X;X	XXXXXXXXXPPPPPPPPPPXXXXXXXXXXXX	AALTQAK(1)SQR	AALTQAK(96.67)SQR	7	2	0.35726	2459700	2459700	0	0	NaN	0	2459700	NaN	NaN	0	0	0	2459700	0	0	NaN	NaN	NaN
A2APD7;Q9D6Z1	281;565	A2APD7	A2APD7	Nucleolar protein 56	Nop56	tr|A2APD7|A2APD7_MOUSE Nucleolar protein 56 (Fragment) OS=Mus musculus GN=Nop56 PE=1 SV=1;sp|Q9D6Z1|NOP56_MOUSE Nucleolar protein 56 OS=Mus musculus GN=Nop56 PE=1 SV=2	0.913177	10.2192	0.0114413	86.898	39.816	86.898					0.913177	10.2192	0.0114413	86.898		1	K	KRKFSEEPEVAANFTKSSTKKKKKSQKAQED	X;X;X;X;X;X;X;X;X;X;X;X;X;X;X;Lactic acid;X;X;X;X;X;X;X;X;X;X;X;X;X;X;X	XXXXXXXXXPPPPPPPPPPPXXXXXXXXXXX	VAANFTK(0.913)SSTK(0.087)	VAANFTK(10.22)SSTK(-10.22)	7	2	-1.1993	1773900	1773900	0	0	NaN	0	1773900	NaN	NaN	0	0	0	1773900	0	0	NaN	NaN	NaN
F6ZRL3;A2AU89;A2AU91;P70399	133;1614;1664;1652	F6ZRL3	F6ZRL3	Tumor suppressor p53-binding protein 1	Trp53bp1;Tp53bp1	tr|F6ZRL3|F6ZRL3_MOUSE Tumor suppressor p53-binding protein 1 (Fragment) OS=Mus musculus GN=Trp53bp1 PE=1 SV=1;tr|A2AU89|A2AU89_MOUSE Tumor suppressor p53-binding protein 1 OS=Mus musculus GN=Trp53bp1 PE=1 SV=2;tr|A2AU91|A2AU91_MOUSE Tumor suppressor p53-b	1	85.6757	0.00450722	85.676	48.117	85.676					1	85.6757	0.00450722	85.676		1	K	KATESPRASTGVPSGKRKLPTSEEERSPAKR	X;X;X;X;X;X;X;X;X;X;X;X;X;X;X;Lactic acid;X;X;X;X;X;X;X;X;X;X;X;X;X;X;X	XXXXXXXPPPPPPPPPPXXXXXXXXXXXXXX	ASTGVPSGK(1)R	ASTGVPSGK(85.68)R	9	2	0.68422	1907900	1907900	0	0	NaN	0	1907900	NaN	NaN	0	0	0	1907900	0	0	NaN	NaN	NaN
A2AWQ2;Q8BK67	122;122	A2AWQ2	A2AWQ2	Protein RCC2	Rcc2	tr|A2AWQ2|A2AWQ2_MOUSE Protein RCC2 (Fragment) OS=Mus musculus GN=Rcc2 PE=1 SV=1;sp|Q8BK67|RCC2_MOUSE Protein RCC2 OS=Mus musculus GN=Rcc2 PE=1 SV=1	1	73.931	0.0290385	73.931	44.121	73.931					1	73.931	0.0290385	73.931		1	K	FGATNWDLIGRKEVPKQQAAYRNLGQNLWGP	X;X;X;X;X;X;X;X;X;X;X;X;X;X;X;Lactic acid;X;X;X;X;X;X;X;X;X;X;X;X;X;X;X	XXXXXXXXXXXXPPPPPPPPPPXXXXXXXXX	EVPK(1)QQAAYR	EVPK(73.93)QQAAYR	4	2	0.42697	1221700	1221700	0	0	NaN	0	1221700	NaN	NaN	0	0	0	1221700	0	0	NaN	NaN	NaN
A2AWQ2;Q8BK67	75;75	A2AWQ2	A2AWQ2	Protein RCC2	Rcc2	tr|A2AWQ2|A2AWQ2_MOUSE Protein RCC2 (Fragment) OS=Mus musculus GN=Rcc2 PE=1 SV=1;sp|Q8BK67|RCC2_MOUSE Protein RCC2 OS=Mus musculus GN=Rcc2 PE=1 SV=1	1	122.25	4.22868e-09	129.51	120.09	129.51	0.999998	56.9376	0.000671558	57.484	1	122.25	4.22868e-09	129.51		1	K	APGGGKRTARPATAGKAAGAAAIITEPEHTK	X;X;X;X;X;X;X;X;X;X;X;X;X;X;X;Lactic acid;X;X;X;X;X;X;X;X;X;X;X;X;X;X;X	XXXXXXXXXXPPPPPPPPPPPPPPPPPPPPP	PATAGK(1)AAGAAAIITEPEHTK	PATAGK(122.25)AAGAAAIITEPEHTK(-122.25)	6	3	0.3879	14714000	14714000	0	0	NaN	2251700	12462000	NaN	NaN	2251700	0	0	12462000	0	0	NaN	NaN	NaN
A2BG76;I7HIP8;A2BG75;A2BG77;P97863	269;269;269;269;270	A2BG76	A2BG76	Nuclear factor 1;Nuclear factor 1 B-type	Nfib	tr|A2BG76|A2BG76_MOUSE Nuclear factor 1 OS=Mus musculus GN=Nfib PE=1 SV=1;tr|I7HIP8|I7HIP8_MOUSE Nuclear factor 1 OS=Mus musculus GN=Nfib PE=1 SV=1;tr|A2BG75|A2BG75_MOUSE Nuclear factor 1 OS=Mus musculus GN=Nfib PE=1 SV=1;tr|A2BG77|A2BG77_MOUSE Nuclear fac	1	78.3345	0.000711118	78.334	37.305	78.334					1	78.3345	0.000711118	78.334		1	K	SGVNLQRSLSSPPSSKRPKTISIDENMEPSP	X;X;X;X;X;X;X;X;X;X;X;X;X;X;X;Lactic acid;X;X;X;X;X;X;X;X;X;X;X;X;X;X;X	XXXXXXXPPPPPPPPPPPPXXXXXXXXXXXX	SLSSPPSSK(1)R	SLSSPPSSK(78.33)R	9	2	-0.22506	4548800	4548800	0	0	NaN	0	0	NaN	NaN	0	0	0	0	0	0	NaN	NaN	NaN
A2BG76;I7HIP8;A2BG75;A2BG77;P97863	272;272;272;272;273	A2BG76	A2BG76	Nuclear factor 1;Nuclear factor 1 B-type	Nfib	tr|A2BG76|A2BG76_MOUSE Nuclear factor 1 OS=Mus musculus GN=Nfib PE=1 SV=1;tr|I7HIP8|I7HIP8_MOUSE Nuclear factor 1 OS=Mus musculus GN=Nfib PE=1 SV=1;tr|A2BG75|A2BG75_MOUSE Nuclear factor 1 OS=Mus musculus GN=Nfib PE=1 SV=1;tr|A2BG77|A2BG77_MOUSE Nuclear fac	0.5	0	0.0209284	56.951	27.016	56.951					0.5	0	0.0209284	56.951		1	K	NLQRSLSSPPSSKRPKTISIDENMEPSPTGD	X;X;X;X;X;X;X;X;X;X;X;X;Lactic acid;X;X;X;X;X;X;X;X;X;X;X;X;X;X;X;X;X;X	XXXXXXXXXXXXXXXXXXXXXXXXXXXXXXX	SLSSPPSSK(0.5)RPK(0.5)	SLSSPPSSK(0)RPK(0)	12	3	-0.61429	4548800	4548800	0	0	NaN	0	4548800	NaN	NaN	0	0	0	4548800	0	0	NaN	NaN	NaN
E9QAQ7;A2BH40	985;985	E9QAQ7	E9QAQ7	AT-rich interactive domain-containing protein 1A	Arid1a	tr|E9QAQ7|E9QAQ7_MOUSE AT-rich interactive domain-containing protein 1A OS=Mus musculus GN=Arid1a PE=1 SV=1;sp|A2BH40|ARI1A_MOUSE AT-rich interactive domain-containing protein 1A OS=Mus musculus GN=Arid1a PE=1 SV=1	0.999999	58.5175	0.00455382	104.2	83.327	104.2					0.999999	58.5175	0.00455382	104.2		1	K	GLGDVKLTPATKMNNKADGTPKTESKSKKSS	X;X;X;X;X;X;X;X;X;X;X;X;X;X;X;Lactic acid;X;X;X;X;X;X;X;X;X;X;X;X;X;X;X	XXXXXXXXXXXXPPPPPPPPPPXXXXXXXXX	MNNK(1)ADGTPK	MNNK(58.52)ADGTPK(-58.52)	4	2	-0.30146	971640	971640	0	0	NaN	0	971640	NaN	NaN	0	0	0	971640	0	0	NaN	NaN	NaN
A3KGL9;F6W687;P09602;Q5XK38	88;104;82;84	A3KGL9	A3KGL9	Non-histone chromosomal protein HMG-17	Hmgn2	tr|A3KGL9|A3KGL9_MOUSE Non-histone chromosomal protein HMG-17 OS=Mus musculus GN=Hmgn2 PE=1 SV=1;tr|F6W687|F6W687_MOUSE Non-histone chromosomal protein HMG-17 (Fragment) OS=Mus musculus GN=Hmgn2 PE=1 SV=1;sp|P09602|HMGN2_MOUSE Non-histone chromosomal prote	0.999539	33.365	0.0183658	64.55	46.492	64.55	0.999539	33.365	0.0183658	64.55						1	K	NNPAENGDAKTDQAQKAEGAGDAK_______	X;X;X;X;X;X;X;X;X;X;X;X;X;X;X;Lactic acid;X;X;X;X;X;X;X;X;X;X;X;X;X;X;X	XXXXXXXXXXPPPPPPPPPPPPPPXXXXXXX	TDQAQK(1)AEGAGDAK	TDQAQK(33.36)AEGAGDAK(-33.36)	6	2	-1.7537	536370	536370	0	0	NaN	536370	0	NaN	NaN	536370	0	0	0	0	0	NaN	NaN	NaN
G3UZ30;A5A4Y9;Q8K1L5	53;64;64	G3UZ30	G3UZ30	Protein phosphatase 1 regulatory subunit 11	Ppp1r11	tr|G3UZ30|G3UZ30_MOUSE Protein phosphatase 1 regulatory subunit 11 (Fragment) OS=Mus musculus GN=Ppp1r11 PE=1 SV=2;tr|A5A4Y9|A5A4Y9_MOUSE Protein phosphatase 1 regulatory subunit 11 OS=Mus musculus GN=Ppp1r11 PE=1 SV=1;sp|Q8K1L5|PP1RB_MOUSE Protein phospha	1	68.6827	0.000846915	82.362	63.949	82.362					1	68.6827	0.000846915	82.362		1	K	SSDTVDNEHMGRRSSKCCCIYEKPRAFGESS	X;X;X;X;X;X;X;X;X;X;X;X;X;X;X;Lactic acid;X;X;X;X;X;X;X;X;X;X;X;X;X;X;X	XXXXXXXXXXXXXPPPPPPPPPPPPXXXXXX	SSK(1)CCCIYEKPR	SSK(68.68)CCCIYEK(-68.68)PR	3	3	-0.84656	1314900	1314900	0	0	NaN	0	1314900	NaN	NaN	0	0	0	1314900	0	0	NaN	NaN	NaN
B1AUB9;B1AUC0;Q02780;F7CDR2	254;276;299;107	B1AUB9	B1AUB9	Nuclear factor 1;Nuclear factor 1 A-type	Nfia	tr|B1AUB9|B1AUB9_MOUSE Nuclear factor 1 OS=Mus musculus GN=Nfia PE=1 SV=1;tr|B1AUC0|B1AUC0_MOUSE Nuclear factor 1 OS=Mus musculus GN=Nfia PE=1 SV=1;sp|Q02780|NFIA_MOUSE Nuclear factor 1 A-type OS=Mus musculus GN=Nfia PE=1 SV=1;tr|F7CDR2|F7CDR2_MOUSE Nuclea	1	81.0165	0.0031461	81.017	47.754	81.017					1	81.0165	0.0031461	81.017		1	K	AMRRSLPSTSSTSSTKRLKSVEDEMDSPGEE	X;X;X;X;X;X;X;X;X;X;X;X;X;X;X;Lactic acid;X;X;X;X;X;X;X;X;X;X;X;X;X;X;X	XXXXPPPPPPPPPPPPPXXXXXXXXXXXXXX	SLPSTSSTSSTK(1)R	SLPSTSSTSSTK(81.02)R	12	2	-0.20976	6254400	6254400	0	0	NaN	0	6254400	NaN	NaN	0	0	0	6254400	0	0	NaN	NaN	NaN
B1AUX2;Q61191	813;813	B1AUX2	B1AUX2	Host cell factor 1;HCF N-terminal chain 1;HCF N-terminal chain 2;HCF N-terminal chain 3;HCF N-terminal chain 4;HCF N-terminal chain 5;HCF N-terminal chain 6;HCF C-terminal chain 1;HCF C-terminal chain 2;HCF C-terminal chain 3;HCF C-terminal chain 4;HCF C-terminal chain 5;HCF C-terminal chain 6	Hcfc1	tr|B1AUX2|B1AUX2_MOUSE Host cell factor 1 OS=Mus musculus GN=Hcfc1 PE=1 SV=1;sp|Q61191|HCFC1_MOUSE Host cell factor 1 OS=Mus musculus GN=Hcfc1 PE=1 SV=2	0.998929	29.6983	8.19163e-05	116.01	101.45	116.01					0.998929	29.6983	8.19163e-05	116.01		1	K	IITTKVMTSGTGAPAKIITAVPKIATGHGQQ	X;X;X;X;X;X;X;X;X;X;X;X;X;X;X;Lactic acid;X;X;X;X;X;X;X;X;X;X;X;X;X;X;X	XXXXXPPPPPPPPPPPPPPPPPPXXXXXXXX	VMTSGTGAPAK(0.999)IITAVPK(0.001)	VMTSGTGAPAK(29.7)IITAVPK(-29.7)	11	2	-0.19665	812230	812230	0	0	NaN	0	812230	NaN	NaN	0	0	0	812230	0	0	NaN	NaN	NaN
B2FDH0;P52483	58;58	B2FDH0	B2FDH0	Ubiquitin-conjugating enzyme E2 E3	Ube2e3	tr|B2FDH0|B2FDH0_MOUSE Ubiquitin-conjugating enzyme E2 E3 (Fragment) OS=Mus musculus GN=Ube2e3 PE=1 SV=8;sp|P52483|UB2E3_MOUSE Ubiquitin-conjugating enzyme E2 E3 OS=Mus musculus GN=Ube2e3 PE=1 SV=2	0.999968	44.8955	0.0211401	79.148	42.753	79.148					0.999968	44.8955	0.0211401	79.148		1	K	TQQKKNTKLSSKTTAKLSTSAKRIQKELAEI	X;X;X;X;X;X;X;X;X;X;X;X;X;X;X;Lactic acid;X;X;X;X;X;X;X;X;X;X;X;X;X;X;X	XXXXXXXXXXXXPPPPPPPPPPXXXXXXXXX	TTAK(1)LSTSAK	TTAK(44.9)LSTSAK(-44.9)	4	2	-0.4317	1190900	1190900	0	0	NaN	0	1190900	NaN	NaN	0	0	0	1190900	0	0	NaN	NaN	NaN
B2M1R6;P61979;H3BLL4	381;405;336	B2M1R6;P61979	P61979	Heterogeneous nuclear ribonucleoprotein K	Hnrnpk	tr|B2M1R6|B2M1R6_MOUSE Heterogeneous nuclear ribonucleoprotein K OS=Mus musculus GN=Hnrnpk PE=1 SV=1;sp|P61979|HNRPK_MOUSE Heterogeneous nuclear ribonucleoprotein K OS=Mus musculus GN=Hnrnpk PE=1 SV=1;tr|H3BLL4|H3BLL4_MOUSE Heterogeneous nuclear ribonucleo	1	187.644	5.33327e-12	187.64	122	187.64	1	63.2832	6.52722e-05	145.89	1	187.644	5.33327e-12	187.64		1	K	TQVTIPKDLAGSIIGKGGQRIKQIRHESGAS	X;X;X;X;X;X;X;X;X;X;X;X;X;X;X;Lactic acid;X;X;X;X;X;X;X;X;X;X;X;X;X;X;X	XXXXXXXPPPPPPPPPPPPPXXXXXXXXXXX	DLAGSIIGK(1)GGQR	DLAGSIIGK(187.64)GGQR	9	2	0.49552	23733000	23733000	0	0	NaN	3620400	20112000	NaN	NaN	3620400	0	0	20112000	0	0	NaN	NaN	NaN
D3Z539;E9PUC8;B2RUS0;Q5F4S8;Q5F4T0;Q5F4S9	224;249;377;379;379;379	D3Z539	D3Z539		Trpm3	tr|D3Z539|D3Z539_MOUSE Protein Trpm3 OS=Mus musculus GN=Trpm3 PE=1 SV=2;tr|E9PUC8|E9PUC8_MOUSE Protein Trpm3 OS=Mus musculus GN=Trpm3 PE=1 SV=1;tr|B2RUS0|B2RUS0_MOUSE Protein Trpm3 OS=Mus musculus GN=Trpm3 PE=1 SV=1;tr|Q5F4S8|Q5F4S8_MOUSE Protein Trpm3 OS=	1	48.6398	0.0131358	48.64	33.068	48.64	1	48.6398	0.0131358	48.64						1	K	CDGSGRASDILAFGHKYSEEGGIYFL_____	X;X;X;X;X;X;X;X;X;X;X;X;X;X;X;Lactic acid;X;X;X;X;X;X;X;X;X;X;X;X;X;X;X	XXXXXXPPPPPPPPPPPPPXXXXXXXXXXXX	ASDILAFGHK(1)YSE	ASDILAFGHK(48.64)YSE	10	2	-2.2479	0	0	0	0	NaN	0	0	NaN	NaN	0	0	0	0	0	0	NaN	NaN	NaN
B2RY56	729	B2RY56	B2RY56	RNA-binding protein 25	Rbm25	sp|B2RY56|RBM25_MOUSE RNA-binding protein 25 OS=Mus musculus GN=Rbm25 PE=1 SV=2	1	43.8078	0.0293345	43.808	25.988	43.808					1	43.8078	0.0293345	43.808		1	K	EDDKNATKGTVNTEEKRKHIKSLIEKIPTAK	X;X;X;X;X;X;X;X;X;X;X;X;X;X;X;Lactic acid;X;X;X;X;X;X;X;X;X;X;X;X;X;X;X	XXXXXXXXPPPPPPPPPXXXXXXXXXXXXXX	GTVNTEEK(1)R	GTVNTEEK(43.81)R	8	2	0.51101	0	0	0	0	NaN	0	0	NaN	NaN	0	0	0	0	0	0	NaN	NaN	NaN
D3YTQ3;F6VQH5;Q9Z130	269;172;150	D3YTQ3	D3YTQ3	Heterogeneous nuclear ribonucleoprotein D-like	Hnrnpdl	tr|D3YTQ3|D3YTQ3_MOUSE Heterogeneous nuclear ribonucleoprotein D-like OS=Mus musculus GN=Hnrnpdl PE=1 SV=1;tr|F6VQH5|F6VQH5_MOUSE Heterogeneous nuclear ribonucleoprotein D-like (Fragment) OS=Mus musculus GN=Hnrnpdl PE=1 SV=1;sp|Q9Z130|HNRDL_MOUSE Heterogen	1	70.17	0.0113578	70.17	9.6067	70.17					1	70.17	0.0113578	70.17		1	K	GAFGEIENIELPMDTKTNERRGFCFITYTDE	X;X;X;X;X;X;X;X;X;X;X;X;X;X;X;Lactic acid;X;X;X;X;X;X;X;X;X;X;X;X;X;X;X	XXXXXXXPPPPPPPPPPPPPXXXXXXXXXXX	NIELPMDTK(1)TNER	NIELPMDTK(70.17)TNER	9	2	1.5179	709250	709250	0	0	NaN	0	709250	NaN	NaN	0	0	0	709250	0	0	NaN	NaN	NaN
D3YW09;G3UVU2;Q62203	77;77;77	D3YW09	D3YW09	Splicing factor 3A subunit 2	Sf3a2	tr|D3YW09|D3YW09_MOUSE Splicing factor 3A subunit 2 OS=Mus musculus GN=Sf3a2 PE=1 SV=1;tr|G3UVU2|G3UVU2_MOUSE Splicing factor 3A subunit 2 OS=Mus musculus GN=Sf3a2 PE=1 SV=1;sp|Q62203|SF3A2_MOUSE Splicing factor 3A subunit 2 OS=Mus musculus GN=Sf3a2 PE=1 S	0.520481	0.355986	0.00892623	53.567	43.912	53.567					0.520481	0.355986	0.00892623	53.567		1	K	LHNNEGSYLAHTQGKKHQTNLARRAAKEAKE	X;X;X;X;X;X;X;X;X;X;X;X;X;X;X;Lactic acid;X;X;X;X;X;X;X;X;X;X;X;X;X;X;X	XXXXXPPPPPPPPPPPXXXXXXXXXXXXXXX	GSYLAHTQGK(0.48)K(0.52)	GSYLAHTQGK(-0.36)K(0.36)	11	3	-0.37782	617190	617190	0	0	NaN	0	617190	NaN	NaN	0	0	0	617190	0	0	NaN	NaN	NaN
D3YYI8;O09106	412;412	D3YYI8	D3YYI8	Histone deacetylase;Histone deacetylase 1	Gm10093;Hdac1	tr|D3YYI8|D3YYI8_MOUSE Histone deacetylase OS=Mus musculus GN=Gm10093 PE=3 SV=1;sp|O09106|HDAC1_MOUSE Histone deacetylase 1 OS=Mus musculus GN=Hdac1 PE=1 SV=1	1	128.686	0.00142524	128.69	84.239	128.69					1	128.686	0.00142524	128.69		1	K	DEEDPDKRISICSSDKRIACEEEFSDSDEEG	X;X;X;X;X;X;X;X;X;X;X;X;X;X;X;Lactic acid;X;X;X;X;X;X;X;X;X;X;X;X;X;X;X	XXXXXXXXPPPPPPPPPXXXXXXXXXXXXXX	ISICSSDK(1)R	ISICSSDK(128.69)R	8	2	-0.36369	6241300	6241300	0	0	NaN	0	6241300	NaN	NaN	0	0	0	6241300	0	0	NaN	NaN	NaN
E9PUH7;D3YZ00;P70257	268;276;276	E9PUH7	E9PUH7	Nuclear factor 1;Nuclear factor 1 X-type	Nfix	tr|E9PUH7|E9PUH7_MOUSE Nuclear factor 1 OS=Mus musculus GN=Nfix PE=1 SV=1;tr|D3YZ00|D3YZ00_MOUSE Nuclear factor 1 (Fragment) OS=Mus musculus GN=Nfix PE=1 SV=1;sp|P70257|NFIX_MOUSE Nuclear factor 1 X-type OS=Mus musculus GN=Nfix PE=1 SV=2	1	73.0666	0.00650169	73.067	34.98	73.067					1	73.0666	0.00650169	73.067		1	K	LGRRSITSPPSTSSTKRPKSIDDSEMESPVD	X;X;X;X;X;X;X;X;X;X;X;X;X;X;X;Lactic acid;X;X;X;X;X;X;X;X;X;X;X;X;X;X;X	XXXXPPPPPPPPPPPPPXXXXXXXXXXXXXX	SITSPPSTSSTK(1)R	SITSPPSTSSTK(73.07)R	12	2	-1.4263	936570	936570	0	0	NaN	0	936570	NaN	NaN	0	0	0	936570	0	0	NaN	NaN	NaN
E9PUH7;D3YZ00;P70257	271;279;279	E9PUH7	E9PUH7	Nuclear factor 1;Nuclear factor 1 X-type	Nfix	tr|E9PUH7|E9PUH7_MOUSE Nuclear factor 1 OS=Mus musculus GN=Nfix PE=1 SV=1;tr|D3YZ00|D3YZ00_MOUSE Nuclear factor 1 (Fragment) OS=Mus musculus GN=Nfix PE=1 SV=1;sp|P70257|NFIX_MOUSE Nuclear factor 1 X-type OS=Mus musculus GN=Nfix PE=1 SV=2	0.570614	1.23494	0.00388658	61.097	38.899	61.097					0.570614	1.23494	0.00388658	61.097		1	K	RSITSPPSTSSTKRPKSIDDSEMESPVDDVF	X;X;X;X;X;X;X;X;X;X;X;X;Lactic acid;X;X;Lactic acid;X;X;X;X;X;X;X;X;X;X;X;X;X;X;X	XPPPPPPPPPPPPPPPXXXXXXXXXXXXXXX	SITSPPSTSSTK(0.429)RPK(0.571)	SITSPPSTSSTK(-1.23)RPK(1.23)	15	3	0.12457	2351600	2351600	0	0	NaN	0	2351600	NaN	NaN	0	0	0	2351600	0	0	NaN	NaN	NaN
E9PUH7;D3YZ00;P70257	316;324;324	E9PUH7	E9PUH7	Nuclear factor 1;Nuclear factor 1 X-type	Nfix	tr|E9PUH7|E9PUH7_MOUSE Nuclear factor 1 OS=Mus musculus GN=Nfix PE=1 SV=1;tr|D3YZ00|D3YZ00_MOUSE Nuclear factor 1 (Fragment) OS=Mus musculus GN=Nfix PE=1 SV=1;sp|P70257|NFIX_MOUSE Nuclear factor 1 X-type OS=Mus musculus GN=Nfix PE=1 SV=2	0.798776	5.98746	1.48034e-05	61.039	47.146	61.039					0.798776	5.98746	1.48034e-05	61.039		1	K	SSGWPNDVDAGPASLKKSGKLDFCSALSSQG	X;X;X;X;X;X;X;X;X;X;X;X;X;X;X;Lactic acid;X;X;X;X;X;X;X;X;X;X;X;X;X;X;X	PPPPPPPPPPPPPPPPPXXXXXXXXXXXXXX	SPAAGSSQSSGWPNDVDAGPASLK(0.799)K(0.201)	SPAAGSSQSSGWPNDVDAGPASLK(5.99)K(-5.99)	24	3	-0.6283	1722900	1722900	0	0	NaN	0	1722900	NaN	NaN	0	0	0	1722900	0	0	NaN	NaN	NaN
E9Q4Q2;D3YZC9;D3YZD0;Q64213;F8WHF9	16;16;16;16;16	E9Q4Q2	E9Q4Q2	Splicing factor 1	Sf1	tr|E9Q4Q2|E9Q4Q2_MOUSE Splicing factor 1 OS=Mus musculus GN=Sf1 PE=1 SV=1;tr|D3YZC9|D3YZC9_MOUSE Splicing factor 1 OS=Mus musculus GN=Sf1 PE=1 SV=1;tr|D3YZD0|D3YZD0_MOUSE Splicing factor 1 OS=Mus musculus GN=Sf1 PE=1 SV=1;sp|Q64213|SF01_MOUSE Splicing fact	0.569872	1.22179	8.77699e-05	117.23	91.847	117.23					0.569872	1.22179	8.77699e-05	117.23		1	K	MATGANATPLDFPSKKRKRSRWNQDTMEQKT	X;X;X;X;X;X;X;X;X;X;X;X;X;X;X;Lactic acid;X;X;X;X;X;X;X;X;X;X;X;X;X;X;X	XPPPPPPPPPPPPPPPXXXXXXXXXXXXXXX	ATGANATPLDFPSK(0.43)K(0.57)	ATGANATPLDFPSK(-1.22)K(1.22)	15	2	0.53264	1882300	1882300	0	0	NaN	0	1882300	NaN	NaN	0	0	0	1882300	0	0	NaN	NaN	NaN
D3Z1R8	134	D3Z1R8	D3Z1R8		Phldb2	tr|D3Z1R8|D3Z1R8_MOUSE Pleckstrin homology-like domain family B member 2 (Fragment) OS=Mus musculus GN=Phldb2 PE=1 SV=1	1	52.6365	0.0123716	52.636	7.656	52.636	1	52.6365	0.0123716	52.636						2	K	YQRNIVARKEKISALKKQA____________	X;X;X;X;X;X;X;X;X;X;X;X;X;X;X;Lactic acid;Lactic acid;X;X;X;X;X;X;X;X;X;X;X;X;X;X	XXXXXXXXXXXPPPPPPPPXXXXXXXXXXXX	ISALK(1)K(1)QA	ISALK(52.64)K(52.64)QA	5	2	-1.0021	0	0	0	0	NaN	0	0	NaN	NaN	0	0	0	0	0	0	NaN	NaN	NaN
D3Z1R8	135	D3Z1R8	D3Z1R8		Phldb2	tr|D3Z1R8|D3Z1R8_MOUSE Pleckstrin homology-like domain family B member 2 (Fragment) OS=Mus musculus GN=Phldb2 PE=1 SV=1	1	52.6365	0.0123716	52.636	7.656	52.636	1	52.6365	0.0123716	52.636						2	K	QRNIVARKEKISALKKQA_____________	X;X;X;X;X;X;X;X;X;X;X;X;X;X;Lactic acid;Lactic acid;X;X;X;X;X;X;X;X;X;X;X;X;X;X;X	XXXXXXXXXXPPPPPPPPXXXXXXXXXXXXX	ISALK(1)K(1)QA	ISALK(52.64)K(52.64)QA	6	2	-1.0021	0	0	0	0	NaN	0	0	NaN	NaN	0	0	0	0	0	0	NaN	NaN	NaN
D3Z2J5;F6Z4B2;E9Q9V3;E9PY55;E9Q701;F8VQL9;Q9WU42	824;459;1236;1375;1377;1411;1376	D3Z2J5	D3Z2J5	Nuclear receptor corepressor 2	Ncor2	tr|D3Z2J5|D3Z2J5_MOUSE Nuclear receptor corepressor 2 (Fragment) OS=Mus musculus GN=Ncor2 PE=1 SV=1;tr|F6Z4B2|F6Z4B2_MOUSE Nuclear receptor corepressor 2 (Fragment) OS=Mus musculus GN=Ncor2 PE=1 SV=1;tr|E9Q9V3|E9Q9V3_MOUSE Nuclear receptor corepressor 2 OS	0.842963	7.29805	0.00226722	71.692	53.891	71.692					0.842963	7.29805	0.00226722	71.692		1	K	TETYKPRPLDPLGPLKLKPTHEGVVATVKEA	X;X;X;X;X;X;X;X;X;X;X;X;X;X;X;Lactic acid;X;X;X;X;X;X;X;X;X;X;X;X;X;X;X	XXXXXXXPPPPPPPPPPPPPPPXXXXXXXXX	PLDPLGPLK(0.843)LK(0.157)PTHE	PLDPLGPLK(7.3)LK(-7.3)PTHE	9	3	-0.80697	1455000	1455000	0	0	NaN	0	1455000	NaN	NaN	0	0	0	1455000	0	0	NaN	NaN	NaN
D3Z3A0;Q9DCL8	12;12	D3Z3A0	D3Z3A0	Protein phosphatase inhibitor 2	Ppp1r2	tr|D3Z3A0|D3Z3A0_MOUSE MCG126099, isoform CRA_b OS=Mus musculus GN=Ppp1r2 PE=1 SV=1;sp|Q9DCL8|IPP2_MOUSE Protein phosphatase inhibitor 2 OS=Mus musculus GN=Ppp1r2 PE=1 SV=3	1	79.4906	0.000577382	103.29	10.593	103.29					1	79.4906	0.000577382	103.29		1	K	____MAASTASHRPIKGILKNKTSAASPPVV	X;X;X;X;X;X;X;X;X;X;X;X;X;X;X;Lactic acid;X;X;X;X;X;X;X;X;X;X;X;X;X;X;X	XXXXXXXXXXXXXPPPPPPPXXXXXXXXXXX	PIK(1)GILK	PIK(79.49)GILK(-79.49)	3	2	-0.62134	0	0	0	0	NaN	0	0	NaN	NaN	0	0	0	0	0	0	NaN	NaN	NaN
D3Z3D2;Q9CQ49	98;151	D3Z3D2	D3Z3D2	Nuclear cap-binding protein subunit 2	Ncbp2	tr|D3Z3D2|D3Z3D2_MOUSE Nuclear cap-binding protein subunit 2 OS=Mus musculus GN=Ncbp2 PE=1 SV=1;sp|Q9CQ49|NCBP2_MOUSE Nuclear cap-binding protein subunit 2 OS=Mus musculus GN=Ncbp2 PE=1 SV=1	0.999999	61.4267	0.0209932	88.029	38.439	88.029					0.999999	61.4267	0.0209932	88.029		1	K	DEYREDYDAGRGGYGKLAQKQ__________	X;X;X;X;X;X;X;X;X;X;X;X;X;X;X;Lactic acid;X;X;X;X;X;X;X;X;X;X;X;X;X;X;X	XXXXXXXXXXXPPPPPPPPPXXXXXXXXXXX	GGYGK(1)LAQK	GGYGK(61.43)LAQK(-61.43)	5	2	-1.6541	3989700	3989700	0	0	NaN	0	3989700	NaN	NaN	0	0	0	3989700	0	0	NaN	NaN	NaN
H7BWX9;D3Z794;P61957	7;7;7	H7BWX9	H7BWX9	Small ubiquitin-related modifier 2	Sumo2	tr|H7BWX9|H7BWX9_MOUSE Small ubiquitin-related modifier 2 OS=Mus musculus GN=Sumo2 PE=1 SV=1;tr|D3Z794|D3Z794_MOUSE Small ubiquitin-related modifier 2 OS=Mus musculus GN=Sumo2 PE=1 SV=1;sp|P61957|SUMO2_MOUSE Small ubiquitin-related modifier 2 OS=Mus muscul	0.965843	15.9483	0.0200438	40.724	20.204	40.724					0.965843	15.9483	0.0200438	40.724			K	_________MADEKPKEGVKTENNDHINLKV	X;X;X;X;X;X;X;X;X;X;X;X;X;X;X;Lactic acid;X;X;X;X;X;X;X;X;X;X;X;X;X;X;X	XXXXXXXXXXPPPPPPPPPPXXXXXXXXXXX	ADEK(0.025)PK(0.966)EGVK(0.01)	ADEK(-15.95)PK(15.95)EGVK(-20.02)	6	2	-1.2727	1151400	1151400	0	0	NaN	0	1151400	NaN	NaN	0	0	0	1151400	0	0	NaN	NaN	NaN
E0CXC2;Q9DBC3	547;107	E0CXC2	E0CXC2	Cap-specific mRNA (nucleoside-2'-O-)-methyltransferase 1	Gm28043;Cmtr1	tr|E0CXC2|E0CXC2_MOUSE Protein Gm28043 OS=Mus musculus GN=Gm28043 PE=4 SV=1;sp|Q9DBC3|CMTR1_MOUSE Cap-specific mRNA (nucleoside-2'-O-)-methyltransferase 1 OS=Mus musculus GN=Cmtr1 PE=1 SV=1	1	84.17	0.00457587	84.17	65.39	84.17					1	84.17	0.00457587	84.17		1	K	RLMAKMGFREGEGLGKYSQGRKDIVETSNQK	X;X;X;X;X;X;X;X;X;X;X;X;X;X;X;Lactic acid;X;X;X;X;X;X;X;X;X;X;X;X;X;X;X	XXXXXXXXXPPPPPPPPPPPPXXXXXXXXXX	EGEGLGK(1)YSQGR	EGEGLGK(84.17)YSQGR	7	2	-0.4363	1322900	1322900	0	0	NaN	0	1322900	NaN	NaN	0	0	0	1322900	0	0	NaN	NaN	NaN
E0CZ27;P84244;F8WI35;E0CYN1;E0CYR7;P84228;P68433	24;24;24;24;24;24;24	E0CZ27;P84228	E0CZ27	Histone H3;Histone H3.3;Histone H3.2;Histone H3.1	H3f3a;Hist1h3b;Hist1h3a	tr|E0CZ27|E0CZ27_MOUSE Histone H3 (Fragment) OS=Mus musculus GN=H3f3a PE=3 SV=1;sp|P84244|H33_MOUSE Histone H3.3 OS=Mus musculus GN=H3f3a PE=1 SV=2;tr|F8WI35|F8WI35_MOUSE Histone H3 OS=Mus musculus GN=H3f3a PE=3 SV=1;tr|E0CYN1|E0CYN1_MOUSE Histone H3.3 (Fr	1	95.3523	0.0265118	95.352	24.907	95.352					1	95.3523	0.0265118	95.352		1	K	RKSTGGKAPRKQLATKAARKSAPATGGVKKP;RKSTGGKAPRKQLATKAARKSAPSTGGVKKP	X;X;X;X;X;X;X;X;X;X;X;X;X;X;X;Lactic acid;X;X;X;X;X;X;X;X;X;X;X;X;X;X;X	XXXXXXXXXXXPPPPPPPPXXXXXXXXXXXX	QLATK(1)AAR	QLATK(95.35)AAR	5	2	0.29511	10348000	10348000	0	0	NaN	0	10348000	NaN	NaN	0	0	0	10348000	0	0	NaN	NaN	NaN
E9PY67;Q3V1C1;G5E869	786;884;987	E9PY67	E9PY67		Zfp142	tr|E9PY67|E9PY67_MOUSE Protein Zfp142 OS=Mus musculus GN=Zfp142 PE=4 SV=1;tr|Q3V1C1|Q3V1C1_MOUSE Protein Zfp142 OS=Mus musculus GN=Zfp142 PE=2 SV=1;tr|G5E869|G5E869_MOUSE MCG133876, isoform CRA_a OS=Mus musculus GN=Zfp142 PE=4 SV=1	1	43.442	0.023729	43.442	7.931	43.442	1	43.272	0.0240309	43.272	1	43.442	0.023729	43.442		1	K	PPRNPLISEEAPNTFKAALTAETVPLPPFPE	X;X;X;X;X;X;X;X;X;X;X;X;X;X;X;Lactic acid;X;X;X;X;X;X;X;X;X;X;X;X;X;X;X	XXXXXXXXXXPPPPPPPPPPPPXXXXXXXXX	APNTFK(1)AALTAE	APNTFK(43.44)AALTAE	6	2	-0.98847	0	0	0	0	NaN	0	0	NaN	NaN	0	0	0	0	0	0	NaN	NaN	NaN
G3X9L5;E9PYU1;Q9D2V7	8;8;8	G3X9L5	G3X9L5	Coronin;Coronin-7	Coro7	tr|G3X9L5|G3X9L5_MOUSE Coronin OS=Mus musculus GN=Coro7 PE=1 SV=1;tr|E9PYU1|E9PYU1_MOUSE Coronin OS=Mus musculus GN=Coro7 PE=1 SV=1;sp|Q9D2V7|CORO7_MOUSE Coronin-7 OS=Mus musculus GN=Coro7 PE=1 SV=2	1	52.6831	0.0144397	52.683	16.288	52.683					1	52.6831	0.0144397	52.683			K	________MSRFKVSKFRHMEARPSRREAWI	X;X;X;X;X;X;X;X;X;X;X;X;X;X;X;Lactic acid;X;X;X;Oxidation (M);X;X;X;X;X;X;X;X;X;X;X	XXXXXXXXXXXXXPPPPPPPPXXXXXXXXXX	VSK(1)FRHME	VSK(52.68)FRHME	3	2	2.9817	1724000	1724000	0	0	NaN	0	1724000	NaN	NaN	0	0	0	1724000	0	0	NaN	NaN	NaN
E9PZJ8	57	E9PZJ8	E9PZJ8	Activating signal cointegrator 1 complex subunit 3	Ascc3	sp|E9PZJ8|ASCC3_MOUSE Activating signal cointegrator 1 complex subunit 3 OS=Mus musculus GN=Ascc3 PE=1 SV=1	0.601617	0	0.0344944	43.512	10.989	43.512	0.601617	0	0.0344944	43.512						2	K	DFGLTWKKIVKFLNEKLEKNKMQNINEDLKD	X;X;X;X;X;X;X;X;X;X;X;X;X;X;X;Lactic acid;X;X;X;X;Lactic acid;X;X;X;X;X;X;X;X;X;X	XXXXXXXXXXXPPPPPPPPPPXXXXXXXXXX	FLNEK(0.602)LEK(0.602)NK(0.797)	FLNEK(0)LEK(0)NK(2.92)	5	3	1.4393	5153900	0	5153900	0	NaN	5153900	0	NaN	NaN	0	5153900	0	0	0	0	NaN	NaN	NaN
E9PZJ8	60	E9PZJ8	E9PZJ8	Activating signal cointegrator 1 complex subunit 3	Ascc3	sp|E9PZJ8|ASCC3_MOUSE Activating signal cointegrator 1 complex subunit 3 OS=Mus musculus GN=Ascc3 PE=1 SV=1	0.601617	0	0.0344944	43.512	10.989	43.512	0.601617	0	0.0344944	43.512						2	K	LTWKKIVKFLNEKLEKNKMQNINEDLKDILQ	X;X;X;X;X;X;X;X;X;X;X;X;X;X;X;X;X;X;X;X;X;X;X;X;X;X;X;X;X;X;X	XXXXXXXXXXXXXXXXXXXXXXXXXXXXXXX	FLNEK(0.602)LEK(0.602)NK(0.797)	FLNEK(0)LEK(0)NK(2.92)	8	3	1.4393	5153900	0	5153900	0	NaN	5153900	0	NaN	NaN	0	5153900	0	0	0	0	NaN	NaN	NaN
E9PZJ8	62	E9PZJ8	E9PZJ8	Activating signal cointegrator 1 complex subunit 3	Ascc3	sp|E9PZJ8|ASCC3_MOUSE Activating signal cointegrator 1 complex subunit 3 OS=Mus musculus GN=Ascc3 PE=1 SV=1	0.796765	2.92302	0.0344944	43.512	10.989	43.512	0.796765	2.92302	0.0344944	43.512						2	K	WKKIVKFLNEKLEKNKMQNINEDLKDILQAA	X;X;X;X;X;X;X;X;X;X;Lactic acid;X;X;X;X;Lactic acid;X;X;X;X;X;X;X;X;X;X;X;X;X;X;X	XXXXXXPPPPPPPPPPXXXXXXXXXXXXXXX	FLNEK(0.602)LEK(0.602)NK(0.797)	FLNEK(0)LEK(0)NK(2.92)	10	3	1.4393	5153900	0	5153900	0	NaN	5153900	0	NaN	NaN	0	5153900	0	0	0	0	NaN	NaN	NaN
E9Q0T4;P56546;E9Q0V8;E9PZG2;E9PX05	6;6;6;6;6	E9Q0T4	E9Q0T4	C-terminal-binding protein 2	Ctbp2	tr|E9Q0T4|E9Q0T4_MOUSE C-terminal-binding protein 2 (Fragment) OS=Mus musculus GN=Ctbp2 PE=1 SV=8;sp|P56546|CTBP2_MOUSE C-terminal-binding protein 2 OS=Mus musculus GN=Ctbp2 PE=1 SV=2;tr|E9Q0V8|E9Q0V8_MOUSE C-terminal-binding protein 2 (Fragment) OS=Mus mu	0.998912	29.6308	0.00320332	94.407	71.388	94.407					0.998912	29.6308	0.00320332	94.407		1	K	__________MALVDKHKVKRQRLDRICEGI	X;X;X;X;X;X;X;X;X;X;X;X;X;X;X;Lactic acid;X;X;X;X;X;X;X;X;X;X;X;X;X;X;X	XXXXXXXXXXXPPPPPPPXXXXXXXXXXXXX	ALVDK(0.999)HK(0.001)	ALVDK(29.63)HK(-29.63)	5	2	-0.19732	9691800	9691800	0	0	NaN	0	9691800	NaN	NaN	0	0	0	9691800	0	0	NaN	NaN	NaN
E9Q1Z0	399	E9Q1Z0	E9Q1Z0		4732456N10Rik	tr|E9Q1Z0|E9Q1Z0_MOUSE Protein Krt90 OS=Mus musculus GN=Krt90 PE=1 SV=1	0.536928	0	0.00704332	58.604	7.9726	58.604	0.536928	0	0.00704332	58.604	0.523776	0	0.0151383	49.418		2	K	QASIADAEQRGELALKDAKNKLAELEDALQK	X;X;X;X;X;X;X;X;X;X;X;X;X;X;X;Lactic acid;X;X;X;X;Lactic acid;X;X;X;X;X;X;X;X;X;X	XXXXXXXXXXXXPPPPPPPPPXXXXXXXXXX	LALK(0.537)DAK(0.537)NK(0.926)	LALK(0)DAK(0)NK(7.97)	4	2	0.60487	68448000	0	68448000	0	NaN	3290500	53663000	NaN	NaN	0	3290500	0	0	53663000	0	NaN	NaN	NaN
E9Q1Z0	402	E9Q1Z0	E9Q1Z0		4732456N10Rik	tr|E9Q1Z0|E9Q1Z0_MOUSE Protein Krt90 OS=Mus musculus GN=Krt90 PE=1 SV=1	0.536928	0	0.00704332	58.604	7.9726	58.604	0.536928	0	0.00704332	58.604	0.523776	0	0.0151383	49.418		2	K	IADAEQRGELALKDAKNKLAELEDALQKAKQ	X;X;X;X;X;X;X;X;X;X;X;X;X;X;X;X;X;X;X;X;X;X;X;X;X;X;X;X;X;X;X	XXXXXXXXXXXXXXXXXXXXXXXXXXXXXXX	LALK(0.537)DAK(0.537)NK(0.926)	LALK(0)DAK(0)NK(7.97)	7	2	0.60487	68448000	0	68448000	0	NaN	3290500	53663000	NaN	NaN	0	3290500	0	0	53663000	0	NaN	NaN	NaN
E9Q1Z0	404	E9Q1Z0	E9Q1Z0		4732456N10Rik	tr|E9Q1Z0|E9Q1Z0_MOUSE Protein Krt90 OS=Mus musculus GN=Krt90 PE=1 SV=1	0.95635	10.3961	0.00704332	58.604	7.9726	49.418	0.939542	8.90435	0.00704332	58.604	0.95635	10.3961	0.0151383	49.418		2	K	DAEQRGELALKDAKNKLAELEDALQKAKQDM	X;X;X;X;X;X;X;X;X;X;Lactic acid;X;X;X;X;Lactic acid;X;X;X;X;X;X;X;X;X;X;X;X;X;X;X	XXXXXXXPPPPPPPPPXXXXXXXXXXXXXXX	LALK(0.522)DAK(0.522)NK(0.956)	LALK(0)DAK(0)NK(10.4)	9	3	-0.23201	68448000	0	68448000	0	NaN	3290500	53663000	NaN	NaN	0	3290500	0	0	53663000	0	NaN	NaN	NaN
E9Q2B0;Q8BMQ2	594;735	E9Q2B0	E9Q2B0	General transcription factor 3C polypeptide 4	Gtf3c4	tr|E9Q2B0|E9Q2B0_MOUSE General transcription factor 3C polypeptide 4 OS=Mus musculus GN=Gtf3c4 PE=1 SV=1;sp|Q8BMQ2|TF3C4_MOUSE General transcription factor 3C polypeptide 4 OS=Mus musculus GN=Gtf3c4 PE=1 SV=2	1	99.8021	0.0070431	99.802	42.243	99.802					1	99.8021	0.0070431	99.802		1	K	RTAQVLIGHISKKMNKQTFPERCSLCKEILP	X;X;X;X;X;X;X;X;X;X;X;X;X;X;X;Lactic acid;X;X;X;X;X;X;X;X;X;X;X;X;X;X;X	XXXXXXXXXXXXXPPPPPPPPPXXXXXXXXX	MNK(1)QTFPER	MNK(99.8)QTFPER	3	2	-0.94465	1253400	1253400	0	0	NaN	0	1253400	NaN	NaN	0	0	0	1253400	0	0	NaN	NaN	NaN
E9Q3K0	253	E9Q3K0	E9Q3K0		Gm6588	tr|E9Q3K0|E9Q3K0_MOUSE Protein Gm6588 OS=Mus musculus GN=Gm6588 PE=4 SV=1	0.97989	16.8777	0.0304248	68.224	8.2044	68.224					0.97989	16.8777	0.0304248	68.224		1	K	FTSRTGSLQKQLKENKKLEASLKKKLKALAP	X;X;X;X;X;X;X;X;X;X;X;X;X;X;X;Lactic acid;X;X;X;X;X;X;X;X;X;X;X;X;X;X;X	XXXXXXXXXXXXXXPPPPPPPPPXXXXXXXX	NK(0.98)K(0.02)LEASLK	NK(16.88)K(-16.88)LEASLK(-68.22)	2	2	-0.20413	63854000	63854000	0	0	NaN	0	63854000	NaN	NaN	0	0	0	63854000	0	0	NaN	NaN	NaN
E9Q4B9;E9Q827;P56212;P60840	28;102;69;74	E9Q4B9	E9Q4B9	cAMP-regulated phosphoprotein 19;Alpha-endosulfine	Arpp19;Ensa	tr|E9Q4B9|E9Q4B9_MOUSE cAMP-regulated phosphoprotein 19 OS=Mus musculus GN=Arpp19 PE=1 SV=1;tr|E9Q827|E9Q827_MOUSE cAMP-regulated phosphoprotein 19 OS=Mus musculus GN=Arpp19 PE=1 SV=1;sp|P56212|ARP19_MOUSE cAMP-regulated phosphoprotein 19 OS=Mus musculus G	0.625508	2.2279	0.00322538	100.48	83.451	100.48					0.625508	2.2279	0.00322538	100.48		1	K	EQKQKYFDSGDYNMAKAKMKNKQLPAAAPDK	X;X;X;X;X;X;X;X;X;X;X;X;X;X;X;Lactic acid;X;X;X;X;X;X;X;X;X;X;X;X;X;X;X	XXXXXPPPPPPPPPPPPPXXXXXXXXXXXXX	YFDSGDYNMAK(0.626)AK(0.374)	YFDSGDYNMAK(2.23)AK(-2.23)	11	2	-0.21359	1039600	1039600	0	0	NaN	0	1039600	NaN	NaN	0	0	0	1039600	0	0	NaN	NaN	NaN
E9Q4T8;Q9JLV5	6;6	E9Q4T8	E9Q4T8	Cullin-3	Cul3	tr|E9Q4T8|E9Q4T8_MOUSE Cullin-3 OS=Mus musculus GN=Cul3 PE=1 SV=1;sp|Q9JLV5|CUL3_MOUSE Cullin-3 OS=Mus musculus GN=Cul3 PE=1 SV=1	1	96.1429	0.000268657	96.143	41.532	96.143					1	96.1429	0.000268657	96.143		1	K	__________MSNLSKGTGSRKDTKMRIRAF	X;X;X;X;X;X;X;X;X;X;X;X;X;X;X;Lactic acid;X;X;X;X;X;X;X;X;X;X;X;X;X;X;X	XXXXXXXXXXXPPPPPPPPPPXXXXXXXXXX	SNLSK(1)GTGSR	SNLSK(96.14)GTGSR	5	2	0.07994	1994600	1994600	0	0	NaN	0	1994600	NaN	NaN	0	0	0	1994600	0	0	NaN	NaN	NaN
E9Q5C9	407	E9Q5C9	E9Q5C9		Nolc1	tr|E9Q5C9|E9Q5C9_MOUSE Protein Nolc1 OS=Mus musculus GN=Nolc1 PE=1 SV=1	0.998926	29.6852	0.00449077	58.743	38.51	58.743					0.998926	29.6852	0.00449077	58.743		1	K	TKSPKPAVTPKPSAAKAVTTPKQPAGSNQKP	X;X;X;X;X;X;X;X;X;X;X;X;X;X;X;Lactic acid;X;X;X;X;X;X;X;X;X;X;X;X;X;X;X	XXXXXXXXXXXPPPPPPPPPPPXXXXXXXXX	PSAAK(0.999)AVTTPK(0.001)	PSAAK(29.69)AVTTPK(-29.69)	5	2	-0.79702	0	0	0	0	NaN	0	0	NaN	NaN	0	0	0	0	0	0	NaN	NaN	NaN
E9Q5F9	43	E9Q5F9	E9Q5F9	Histone-lysine N-methyltransferase SETD2	Setd2	sp|E9Q5F9|SETD2_MOUSE Histone-lysine N-methyltransferase SETD2 OS=Mus musculus GN=Setd2 PE=1 SV=1	0.991998	20.9332	0.00526724	61.962	39.876	61.962					0.991998	20.9332	0.00526724	61.962		1	K	ENEAKIENVQKTGFIKGPVFKGVASSRFLPK	X;X;X;X;X;X;X;X;X;X;X;X;X;X;X;Lactic acid;X;X;X;X;X;X;X;X;X;X;X;X;X;X;X	XXXXXXXXXXXPPPPPPPPPPXXXXXXXXXX	TGFIK(0.992)GPVFK(0.008)	TGFIK(20.93)GPVFK(-20.93)	5	2	0.9071	0	0	0	0	NaN	0	0	NaN	NaN	0	0	0	0	0	0	NaN	NaN	NaN
E9QL13;Q8C2Q3	600;600	E9QL13	E9QL13	RNA-binding protein 14	Rbm14	tr|E9QL13|E9QL13_MOUSE MCG8382, isoform CRA_c OS=Mus musculus GN=Rbm14 PE=1 SV=2;sp|Q8C2Q3|RBM14_MOUSE RNA-binding protein 14 OS=Mus musculus GN=Rbm14 PE=1 SV=1	1	83.6143	0.0336883	83.614	36.569	83.614					1	83.6143	0.0336883	83.614		1	K	RASYDDPYKKAVAMSKRYCMPPPPQPLAGA_	X;X;X;X;X;X;X;X;X;X;X;X;X;X;X;Lactic acid;X;X;X;X;X;X;X;X;X;X;X;X;X;X;X	XXXXXXXXXXPPPPPPPXXXXXXXXXXXXXX	AVAMSK(1)R	AVAMSK(83.61)R	6	2	0.56705	2151200	2151200	0	0	NaN	0	2151200	NaN	NaN	0	0	0	2151200	0	0	NaN	NaN	NaN
E9QMD3;Q61329	3447;3450	E9QMD3	E9QMD3	Zinc finger homeobox protein 3	Zfhx3	tr|E9QMD3|E9QMD3_MOUSE Zinc finger homeobox protein 3 OS=Mus musculus GN=Zfhx3 PE=1 SV=1;sp|Q61329|ZFHX3_MOUSE Zinc finger homeobox protein 3 OS=Mus musculus GN=Zfhx3 PE=1 SV=1	0.997892	26.7518	0.0160193	44.117	16.63	44.117					0.997892	26.7518	0.0160193	44.117			K	PDKDPAKESPKPEEQKNVPREVSPLLPKPPE	X;X;X;X;X;X;X;X;X;X;X;X;X;X;X;Lactic acid;X;X;X;X;X;X;X;X;X;X;X;X;X;X;X	XXXXXXXPPPPPPPPPXXXXXXXXXXXXXXX	ESPK(0.002)PEEQK(0.998)	ESPK(-26.75)PEEQK(26.75)	9	2	0.58597	5395500	5395500	0	0	NaN	0	5395500	NaN	NaN	0	0	0	5395500	0	0	NaN	NaN	NaN
E9QMN5;Q8CHY6	581;580	E9QMN5	E9QMN5	Transcriptional repressor p66 alpha	Gatad2a	tr|E9QMN5|E9QMN5_MOUSE Transcriptional repressor p66 alpha OS=Mus musculus GN=Gatad2a PE=1 SV=1;sp|Q8CHY6|P66A_MOUSE Transcriptional repressor p66 alpha OS=Mus musculus GN=Gatad2a PE=1 SV=2	0.916142	10.3842	0.0143832	81.297	30.331	81.297					0.916142	10.3842	0.0143832	81.297		1	K	SERVVGTGKGTASNWKKTPLSTGGTLAFVSP	X;X;X;X;X;X;X;X;X;X;X;X;X;X;X;Lactic acid;X;X;X;X;X;X;X;X;X;X;X;X;X;X;X	XXXXXXXXXPPPPPPPPXXXXXXXXXXXXXX	GTASNWK(0.916)K(0.084)	GTASNWK(10.38)K(-10.38)	7	2	0.36767	1183000	1183000	0	0	NaN	0	1183000	NaN	NaN	0	0	0	1183000	0	0	NaN	NaN	NaN
E9QMN5;Q8CHY6	200;200	E9QMN5	E9QMN5	Transcriptional repressor p66 alpha	Gatad2a	tr|E9QMN5|E9QMN5_MOUSE Transcriptional repressor p66 alpha OS=Mus musculus GN=Gatad2a PE=1 SV=1;sp|Q8CHY6|P66A_MOUSE Transcriptional repressor p66 alpha OS=Mus musculus GN=Gatad2a PE=1 SV=2	1	45.7042	0.0202576	45.704	27.108	45.704					1	45.7042	0.0202576	45.704		1	K	TPPPLVRGTQNIPAGKTSLQTSSTRIPGSII	X;X;X;X;X;X;X;X;X;X;X;X;X;X;X;Lactic acid;X;X;X;X;X;X;X;X;X;X;X;X;X;X;X	XXXXXXXPPPPPPPPPPPPPPPPPPXXXXXX	GTQNIPAGK(1)TSLQTSSTR	GTQNIPAGK(45.7)TSLQTSSTR	9	3	-0.31659	949860	949860	0	0	NaN	0	949860	NaN	NaN	0	0	0	949860	0	0	NaN	NaN	NaN
E9QMN5;Q8CHY6	574;573	E9QMN5	E9QMN5	Transcriptional repressor p66 alpha	Gatad2a	tr|E9QMN5|E9QMN5_MOUSE Transcriptional repressor p66 alpha OS=Mus musculus GN=Gatad2a PE=1 SV=1;sp|Q8CHY6|P66A_MOUSE Transcriptional repressor p66 alpha OS=Mus musculus GN=Gatad2a PE=1 SV=2	0.999999	60.2051	0.000805353	131.82	92.856	131.82					0.999999	60.2051	0.000805353	131.82		1	K	VSRTGRHSERVVGTGKGTASNWKKTPLSTGG	X;X;X;X;X;X;X;X;X;X;X;X;X;X;X;Lactic acid;X;X;X;X;X;X;Lactic acid;X;X;X;X;X;X;X;X	XXXXXXXXXXPPPPPPPPPPPPPXXXXXXXX	VVGTGK(1)GTASNWK	VVGTGK(60.21)GTASNWK(-60.21)	6	2	0.66359	1313600	1313600	0	0	NaN	0	1313600	NaN	NaN	0	0	0	1313600	0	0	NaN	NaN	NaN
E9QPI5;Q6A026	1292;1292	E9QPI5	E9QPI5	Sister chromatid cohesion protein PDS5 homolog A	Pds5a	tr|E9QPI5|E9QPI5_MOUSE Sister chromatid cohesion protein PDS5 homolog A OS=Mus musculus GN=Pds5a PE=1 SV=1;sp|Q6A026|PDS5A_MOUSE Sister chromatid cohesion protein PDS5 homolog A OS=Mus musculus GN=Pds5a PE=1 SV=3	0.99987	38.8707	0.00856747	68.676	60.371	68.676					0.99987	38.8707	0.00856747	68.676		1	K	QGNATKNDDLNKPVSKGRKRAAGSQESLEAG	X;X;X;X;X;X;X;X;X;X;X;X;X;X;X;Lactic acid;X;X;X;X;X;X;X;X;X;X;X;X;X;X;X	XXXXXXPPPPPPPPPPPPXXXXXXXXXXXXX	NDDLNKPVSK(1)GR	NDDLNK(-38.87)PVSK(38.87)GR	10	3	0.14806	1886200	1886200	0	0	NaN	0	1886200	NaN	NaN	0	0	0	1886200	0	0	NaN	NaN	NaN
F7B5B5;Q8VHM5	482;583	F7B5B5	F7B5B5		Hnrnpr	tr|F7B5B5|F7B5B5_MOUSE Protein Hnrnpr OS=Mus musculus GN=Hnrnpr PE=1 SV=1;tr|Q8VHM5|Q8VHM5_MOUSE Heterogeneous nuclear ribonucleoprotein R OS=Mus musculus GN=Hnrnpr PE=1 SV=1	1	44.3175	0.0157432	44.318	26.006	44.318					1	44.3175	0.0157432	44.318		1	K	VGGKRKADGYNQPDSKRRQTNNQQNWGSQPI	X;X;X;X;X;X;X;X;X;X;X;X;X;X;X;Lactic acid;X;X;X;X;X;X;X;X;X;X;X;X;X;X;X	XXXXXXPPPPPPPPPPPXXXXXXXXXXXXXX	ADGYNQPDSK(1)R	ADGYNQPDSK(44.32)R	10	2	0.042378	0	0	0	0	NaN	0	0	NaN	NaN	0	0	0	0	0	0	NaN	NaN	NaN
F8WHY8;Q8K4B0;E9PX23	609;626;614	F8WHY8	F8WHY8	Metastasis-associated protein MTA1	Mta1	tr|F8WHY8|F8WHY8_MOUSE Metastasis-associated protein MTA1 OS=Mus musculus GN=Mta1 PE=1 SV=1;sp|Q8K4B0|MTA1_MOUSE Metastasis-associated protein MTA1 OS=Mus musculus GN=Mta1 PE=1 SV=1;tr|E9PX23|E9PX23_MOUSE Metastasis-associated protein MTA1 OS=Mus musculus	0.961487	13.9733	0.00337472	103.22	55.397	103.22					0.961487	13.9733	0.00337472	103.22		1	K	QTRHMGPSRNLLLNGKSYPTKVRLIRGGSLP	X;X;X;X;X;X;X;X;X;X;X;X;X;X;X;Lactic acid;X;X;X;X;X;X;X;X;X;X;X;X;X;X;X	XXXXXXXXXPPPPPPPPPPPPXXXXXXXXXX	NLLLNGK(0.961)SYPTK(0.039)	NLLLNGK(13.97)SYPTK(-13.97)	7	2	1.2875	3329000	3329000	0	0	NaN	0	3329000	NaN	NaN	0	0	0	3329000	0	0	NaN	NaN	NaN
F8WHY8;Q8K4B0;E9PX23	565;582;582	F8WHY8	F8WHY8	Metastasis-associated protein MTA1	Mta1	tr|F8WHY8|F8WHY8_MOUSE Metastasis-associated protein MTA1 OS=Mus musculus GN=Mta1 PE=1 SV=1;sp|Q8K4B0|MTA1_MOUSE Metastasis-associated protein MTA1 OS=Mus musculus GN=Mta1 PE=1 SV=1;tr|E9PX23|E9PX23_MOUSE Metastasis-associated protein MTA1 OS=Mus musculus	1	122.699	9.90633e-05	122.7	106.45	122.7					1	122.699	9.90633e-05	122.7		1	K	KSAPVINNGSPTILGKRSYEQHNGVDGNMKK	X;X;X;X;X;X;X;X;X;X;X;X;X;X;X;Lactic acid;X;X;X;X;X;X;X;X;X;X;X;X;X;X;Lactic acid	XPPPPPPPPPPPPPPPPXXXXXXXXXXXXXX	SAPVINNGSPTILGK(1)R	SAPVINNGSPTILGK(122.7)R	15	2	1.2073	2029700	2029700	0	0	NaN	0	2029700	NaN	NaN	0	0	0	2029700	0	0	NaN	NaN	NaN
F8WHY8;Q8K4B0;E9PX23	445;462;462	F8WHY8	F8WHY8	Metastasis-associated protein MTA1	Mta1	tr|F8WHY8|F8WHY8_MOUSE Metastasis-associated protein MTA1 OS=Mus musculus GN=Mta1 PE=1 SV=1;sp|Q8K4B0|MTA1_MOUSE Metastasis-associated protein MTA1 OS=Mus musculus GN=Mta1 PE=1 SV=1;tr|E9PX23|E9PX23_MOUSE Metastasis-associated protein MTA1 OS=Mus musculus	0.998477	28.1665	0.00397291	109.71	109.71	109.71					0.998477	28.1665	0.00397291	109.71		1	K	NMSPHGIPARSSGSPKFAMKTRQAFYLHTTK	X;X;X;X;X;X;X;X;X;X;X;X;X;X;X;Lactic acid;X;X;X;X;X;X;X;X;X;X;X;X;X;X;X	XXXXXXXXXXPPPPPPPPPPXXXXXXXXXXX	SSGSPK(0.998)FAMK(0.002)	SSGSPK(28.17)FAMK(-28.17)	6	2	0.70417	3960200	3960200	0	0	NaN	0	3960200	NaN	NaN	0	0	0	3960200	0	0	NaN	NaN	NaN
F8WHY8;Q8K4B0	580;597	F8WHY8	F8WHY8	Metastasis-associated protein MTA1	Mta1	tr|F8WHY8|F8WHY8_MOUSE Metastasis-associated protein MTA1 OS=Mus musculus GN=Mta1 PE=1 SV=1;sp|Q8K4B0|MTA1_MOUSE Metastasis-associated protein MTA1 OS=Mus musculus GN=Mta1 PE=1 SV=1	0.534806	0.605619	0.025706	49.31	38.522	49.31					0.534806	0.605619	0.025706	49.31		1	K	KRSYEQHNGVDGNMKKRLLMPSRGLANHGQT	Lactic acid;X;X;X;X;X;X;X;X;X;X;X;X;X;X;Lactic acid;X;X;X;X;X;X;X;X;X;X;X;X;X;X;X	XXPPPPPPPPPPPPPPXXXXXXXXXXXXXXX	SYEQHNGVDGNMK(0.465)K(0.535)	SYEQHNGVDGNMK(-0.61)K(0.61)	14	3	1.5874	2985700	2985700	0	0	NaN	0	2985700	NaN	NaN	0	0	0	2985700	0	0	NaN	NaN	NaN
F8WI88;Q6P8I4;Q3TM89	78;67;67	F8WI88	F8WI88	PEST proteolytic signal-containing nuclear protein	Pcnp	tr|F8WI88|F8WI88_MOUSE PEST proteolytic signal-containing nuclear protein OS=Mus musculus GN=Pcnp PE=1 SV=1;sp|Q6P8I4|PCNP_MOUSE PEST proteolytic signal-containing nuclear protein OS=Mus musculus GN=Pcnp PE=1 SV=1;tr|Q3TM89|Q3TM89_MOUSE PEST proteolytic si	0.698708	3.67654	0.00155351	89.231	81.126	89.231					0.698708	3.67654	0.00155351	89.231		1	K	RSAEDEAADLPTKPTKMSKFGFAIGSQTARK	X;X;X;X;X;X;X;X;X;X;X;X;X;X;X;Lactic acid;X;X;X;X;X;X;X;X;X;X;X;X;X;X;X	XXXXXXPPPPPPPPPPPPPXXXXXXXXXXXX	AADLPTK(0.002)PTK(0.699)MSK(0.3)	AADLPTK(-26.34)PTK(3.68)MSK(-3.68)	10	3	0.03436	12962000	12962000	0	0	NaN	0	12962000	NaN	NaN	0	0	0	12962000	0	0	NaN	NaN	NaN
F8WI88;Q6P8I4;D3YWA4	161;150;83	F8WI88	F8WI88	PEST proteolytic signal-containing nuclear protein	Pcnp	tr|F8WI88|F8WI88_MOUSE PEST proteolytic signal-containing nuclear protein OS=Mus musculus GN=Pcnp PE=1 SV=1;sp|Q6P8I4|PCNP_MOUSE PEST proteolytic signal-containing nuclear protein OS=Mus musculus GN=Pcnp PE=1 SV=1;tr|D3YWA4|D3YWA4_MOUSE PEST proteolytic si	0.818616	6.54481	4.57275e-13	181.31	152.59	181.31					0.818616	6.54481	4.57275e-13	181.31		1	K	IGRDTPTSAGPNSFNKGKHGFSDNQKLWERN	X;X;X;X;X;X;X;X;X;X;X;X;X;X;X;Lactic acid;X;X;X;X;X;X;X;X;X;X;X;X;X;X;X	XXXPPPPPPPPPPPPPPPXXXXXXXXXXXXX	DTPTSAGPNSFNK(0.819)GK(0.181)	DTPTSAGPNSFNK(6.54)GK(-6.54)	13	2	0.30574	3652000	3652000	0	0	NaN	0	3652000	NaN	NaN	0	0	0	3652000	0	0	NaN	NaN	NaN
G3XA10;Q8VEK3	181;181	G3XA10	G3XA10	Heterogeneous nuclear ribonucleoprotein U	Gm28062;Hnrnpu	tr|G3XA10|G3XA10_MOUSE Heterogeneous nuclear ribonucleoprotein U OS=Mus musculus GN=Gm28062 PE=4 SV=1;sp|Q8VEK3|HNRPU_MOUSE Heterogeneous nuclear ribonucleoprotein U OS=Mus musculus GN=Hnrnpu PE=1 SV=1	1	76.4173	1.74401e-05	76.417	62.834	76.417					1	76.4173	1.74401e-05	76.417		1	K	QQPSQQRGAGKEAAGKSSGPTSLFAVTVAPP	X;X;X;X;X;X;X;X;X;X;X;X;X;X;X;Lactic acid;X;X;X;X;X;X;X;X;X;X;X;X;X;X;X	XXXXXXXXXXXPPPPPPPPPPPPPPPPPPPP	EAAGK(1)SSGPTSLFAVTVAPPGAR	EAAGK(76.42)SSGPTSLFAVTVAPPGAR	5	3	0.17131	4271100	4271100	0	0	NaN	0	4271100	NaN	NaN	0	0	0	4271100	0	0	NaN	NaN	NaN
G3XA10;Q8VEK3	28;28	G3XA10	G3XA10	Heterogeneous nuclear ribonucleoprotein U	Gm28062;Hnrnpu	tr|G3XA10|G3XA10_MOUSE Heterogeneous nuclear ribonucleoprotein U OS=Mus musculus GN=Gm28062 PE=4 SV=1;sp|Q8VEK3|HNRPU_MOUSE Heterogeneous nuclear ribonucleoprotein U OS=Mus musculus GN=Hnrnpu PE=1 SV=1	0.982445	17.479	0.0227296	58.981	14.37	58.981					0.982445	17.479	0.0227296	58.981		1	K	VSELKEELKKRRLSDKGLKADLMDRLQAALD	X;X;X;X;X;X;X;X;X;X;X;X;X;X;X;Lactic acid;X;X;X;X;X;X;X;X;X;X;X;X;X;X;X	XXXXXXXXXXXXPPPPPPPXXXXXXXXXXXX	LSDK(0.982)GLK(0.018)	LSDK(17.48)GLK(-17.48)	4	2	0.6706	0	0	0	0	NaN	0	0	NaN	NaN	0	0	0	0	0	0	NaN	NaN	NaN
G3XA10;Q8VEK3	9;9	G3XA10	G3XA10	Heterogeneous nuclear ribonucleoprotein U	Gm28062;Hnrnpu	tr|G3XA10|G3XA10_MOUSE Heterogeneous nuclear ribonucleoprotein U OS=Mus musculus GN=Gm28062 PE=4 SV=1;sp|Q8VEK3|HNRPU_MOUSE Heterogeneous nuclear ribonucleoprotein U OS=Mus musculus GN=Hnrnpu PE=1 SV=1	0.920688	10.6477	0.002738	74.127	49.973	74.127	0.901989	9.63929	0.0167776	44.447	0.920688	10.6477	0.002738	74.127		1	K	_______MSSSPVNVKKLKVSELKEELKKRR	X;X;X;X;X;X;X;X;X;X;X;X;X;X;X;Lactic acid;X;X;X;X;X;X;X;X;X;X;X;X;X;X;X	XXXXXXXXPPPPPPPPPXXXXXXXXXXXXXX	SSSPVNVK(0.921)K(0.079)	SSSPVNVK(10.65)K(-10.65)	8	2	-0.20645	4962800	4962800	0	0	NaN	1536800	3426100	NaN	NaN	1536800	0	0	3426100	0	0	NaN	NaN	NaN
G5E924;Q8R081	54;62	G5E924	G5E924	Heterogeneous nuclear ribonucleoprotein L	Hnrnpl	tr|G5E924|G5E924_MOUSE Heterogeneous nuclear ribonucleoprotein L (Fragment) OS=Mus musculus GN=Hnrnpl PE=1 SV=1;sp|Q8R081|HNRPL_MOUSE Heterogeneous nuclear ribonucleoprotein L OS=Mus musculus GN=Hnrnpl PE=1 SV=2	1	68.7236	7.57584e-08	69.094	56.66	69.094					1	68.7236	7.57584e-08	69.094		1	K	YYGGGNEGGRAPKRLKTENAGDQHGGGGGGG	X;X;X;X;X;X;X;X;X;X;X;X;X;X;X;Lactic acid;X;X;X;X;X;X;X;X;X;X;X;X;X;X;X	XXXXXXXXXXXXXXPPPPPPPPPPPPPPPPP	LK(1)TENAGDQHGGGGGGGSGAAGGGGGENYDDPHK	LK(68.72)TENAGDQHGGGGGGGSGAAGGGGGENYDDPHK(-68.72)	2	4	0.05851	4760600	4760600	0	0	2.3884	0	4760600	0	4.0114	0	0	0	4760600	0	0	NaN	NaN	NaN
G5E924;Q8R081;G3UY38	291;299;169	G5E924	G5E924	Heterogeneous nuclear ribonucleoprotein L	Hnrnpl	tr|G5E924|G5E924_MOUSE Heterogeneous nuclear ribonucleoprotein L (Fragment) OS=Mus musculus GN=Hnrnpl PE=1 SV=1;sp|Q8R081|HNRPL_MOUSE Heterogeneous nuclear ribonucleoprotein L OS=Mus musculus GN=Hnrnpl PE=1 SV=2;tr|G3UY38|G3UY38_MOUSE Heterogeneous nuclear	1	50.9454	0.000489984	50.945	44.07	50.945					1	50.9454	0.000489984	50.945		1	K	NPNLSGQGDPGSNPNKRQRQPPLLGDHPAEY	X;X;X;X;X;X;X;X;X;X;X;X;X;X;X;Lactic acid;X;X;X;X;X;X;X;X;X;X;X;X;X;X;X	PPPPPPPPPPPPPPPPPXXXXXXXXXXXXXX	NDQDTWDYTNPNLSGQGDPGSNPNK(1)R	NDQDTWDYTNPNLSGQGDPGSNPNK(50.95)R	25	3	-0.50802	1572600	1572600	0	0	0.18805	0	1572600	0	0.25432	0	0	0	1572600	0	0	NaN	NaN	NaN
G5E924;Q8R081;G3UY38	564;535;405	G5E924	G5E924	Heterogeneous nuclear ribonucleoprotein L	Hnrnpl	tr|G5E924|G5E924_MOUSE Heterogeneous nuclear ribonucleoprotein L (Fragment) OS=Mus musculus GN=Hnrnpl PE=1 SV=1;sp|Q8R081|HNRPL_MOUSE Heterogeneous nuclear ribonucleoprotein L OS=Mus musculus GN=Hnrnpl PE=1 SV=2;tr|G3UY38|G3UY38_MOUSE Heterogeneous nuclear	1	89.3546	0.0266394	89.355	60.206	89.355					1	89.3546	0.0266394	89.355		1	K	ELGVKRPTSVKVFSGKSERSSSGLLEWDSKS	X;X;X;X;X;X;X;X;X;X;X;X;X;X;X;Lactic acid;X;X;X;X;X;X;X;X;X;X;X;X;X;X;X	XXXXXXXXXXXPPPPPPPPXXXXXXXXXXXX	VFSGK(1)SER	VFSGK(89.35)SER	5	2	-0.43576	2068900	2068900	0	0	NaN	0	2068900	NaN	NaN	0	0	0	2068900	0	0	NaN	NaN	NaN
H3BKH3;Q8VI24	346;464	H3BKH3	H3BKH3	DNA-binding protein SATB;DNA-binding protein SATB2	Satb2	tr|H3BKH3|H3BKH3_MOUSE DNA-binding protein SATB OS=Mus musculus GN=Satb2 PE=1 SV=1;sp|Q8VI24|SATB2_MOUSE DNA-binding protein SATB2 OS=Mus musculus GN=Satb2 PE=1 SV=1	0.99994	42.2421	0.0167289	44.299	29.609	44.299					0.99994	42.2421	0.0167289	44.299		1	K	SSASSSPSSSRTPQAKTSTPTTDLPIKVDGA	X;X;X;X;X;X;X;X;X;X;X;X;X;X;X;Lactic acid;X;X;X;X;X;X;X;X;X;X;X;X;X;X;X	XXXXXXXXXXXPPPPPPPPPPPPPPPPXXXX	TPQAK(1)TSTPTTDLPIK	TPQAK(42.24)TSTPTTDLPIK(-42.24)	5	2	-0.18384	0	0	0	0	NaN	0	0	NaN	NaN	0	0	0	0	0	0	NaN	NaN	NaN
O08553	525	O08553	O08553	Dihydropyrimidinase-related protein 2	Dpysl2	sp|O08553|DPYL2_MOUSE Dihydropyrimidinase-related protein 2 OS=Mus musculus GN=Dpysl2 PE=1 SV=2	1	100.017	0.00358049	100.02	77.931	100.02	1	73.985	0.0264619	73.985	1	100.017	0.00358049	100.02		1	K	PKTVTPASSAKTSPAKQQAPPVRNLHQSGFS	X;X;X;X;X;X;X;X;X;X;X;X;X;X;X;Lactic acid;X;X;X;X;X;X;X;X;X;X;X;X;X;X;X	XXXXXXXXXXXPPPPPPPPPPPPXXXXXXXX	TSPAK(1)QQAPPVR	TSPAK(100.02)QQAPPVR	5	2	-0.79605	3468500	3468500	0	0	NaN	554400	2914100	NaN	NaN	554400	0	0	2914100	0	0	NaN	NaN	NaN
O08553	520	O08553	O08553	Dihydropyrimidinase-related protein 2	Dpysl2	sp|O08553|DPYL2_MOUSE Dihydropyrimidinase-related protein 2 OS=Mus musculus GN=Dpysl2 PE=1 SV=2	0.998814	29.2529	0.00209157	122.51	58.213	122.51	0.993587	21.9012	0.00261392	100.55	0.998814	29.2529	0.00209157	122.51		1	K	EVSVTPKTVTPASSAKTSPAKQQAPPVRNLH	X;X;X;X;X;X;X;X;X;X;X;X;X;X;X;Lactic acid;X;X;X;X;Lactic acid;X;X;X;X;X;X;X;X;X;X	XXXXXXXPPPPPPPPPPPPPPXXXXXXXXXX	TVTPASSAK(0.999)TSPAK(0.001)	TVTPASSAK(29.25)TSPAK(-29.25)	9	2	0.36917	4734900	4734900	0	0	NaN	1288100	3446800	NaN	NaN	1288100	0	0	3446800	0	0	NaN	NaN	NaN
O08997	60	O08997	O08997	Copper transport protein ATOX1	Atox1	sp|O08997|ATOX1_MOUSE Copper transport protein ATOX1 OS=Mus musculus GN=Atox1 PE=1 SV=1	1	74.4738	0.010335	88.681	61.377	88.681					1	74.4738	0.010335	88.681		1	K	EHSSDTLLATLNKTGKAVSYLGPK_______	X;X;X;X;X;X;X;X;X;X;X;X;X;X;X;Lactic acid;X;X;X;X;X;X;X;X;X;X;X;X;X;X;X	XXXXXXXXXXXXXPPPPPPPPPPPXXXXXXX	TGK(1)AVSYLGPK	TGK(74.47)AVSYLGPK(-74.47)	3	2	-0.28521	1843000	1843000	0	0	NaN	0	1843000	NaN	NaN	0	0	0	1843000	0	0	NaN	NaN	NaN
O55042	45	O55042	O55042	Alpha-synuclein	Snca	sp|O55042|SYUA_MOUSE Alpha-synuclein OS=Mus musculus GN=Snca PE=1 SV=2	0.673841	3.15127	0.013613	66.435	37.348	66.435					0.673841	3.15127	0.013613	66.435		1	K	AGKTKEGVLYVGSKTKEGVVHGVTTVAEKTK	X;X;X;X;X;X;X;X;X;X;X;X;X;X;X;Lactic acid;X;X;X;X;X;X;X;X;X;X;X;X;X;X;X	XXXXXPPPPPPPPPPPXXXXXXXXXXXXXXX	EGVLYVGSK(0.326)TK(0.674)	EGVLYVGSK(-3.15)TK(3.15)	11	2	0.62347	0	0	0	0	NaN	0	0	NaN	NaN	0	0	0	0	0	0	NaN	NaN	NaN
Q9CXL6;Q6PGI2;O88809	275;275;275	Q9CXL6	Q9CXL6	Neuronal migration protein doublecortin	Dcx	tr|Q9CXL6|Q9CXL6_MOUSE Doublecortin, isoform CRA_a OS=Mus musculus GN=Dcx PE=1 SV=1;tr|Q6PGI2|Q6PGI2_MOUSE Dcx protein OS=Mus musculus GN=Dcx PE=1 SV=1;sp|O88809|DCX_MOUSE Neuronal migration protein doublecortin OS=Mus musculus GN=Dcx PE=1 SV=1	1	63.949	0.0101065	82.261	62.99	82.261					1	63.949	0.0101065	82.261		1	K	AQDDFSLDENECRVMKGNPSAAAGPKASPTP	X;X;X;X;X;X;X;X;X;X;X;X;X;X;X;Lactic acid;X;X;X;X;X;X;X;X;X;X;X;X;X;X;X	XXXXXXXXXXXXXPPPPPPPPPPPPPXXXXX	VMK(1)GNPSAAAGPK	VMK(63.95)GNPSAAAGPK(-63.95)	3	2	-0.51547	2181300	2181300	0	0	NaN	0	2181300	NaN	NaN	0	0	0	2181300	0	0	NaN	NaN	NaN
P05063;P05064;A6ZI44;D3YWI1;A0A0U1RPN8;Q9CPQ9;A6ZI46;A0A0U1RPT5;A6ZI47	147;147;201;147;147;147;202;201;147	P05063;P05064	P05064	Fructose-bisphosphate aldolase C;Fructose-bisphosphate aldolase A;Fructose-bisphosphate aldolase	Aldoc;Aldoa;Aldoart1;Aldoart2	sp|P05063|ALDOC_MOUSE Fructose-bisphosphate aldolase C OS=Mus musculus GN=Aldoc PE=1 SV=4;sp|P05064|ALDOA_MOUSE Fructose-bisphosphate aldolase A OS=Mus musculus GN=Aldoa PE=1 SV=2;tr|A6ZI44|A6ZI44_MOUSE Fructose-bisphosphate aldolase OS=Mus musculus GN=Ald	1	133.116	0.00414783	133.12	102.4	133.12	1	113.412	0.00719913	113.41	1	133.116	0.00414783	133.12		1	K	LERCAQYKKDGADFAKWRCVLKISDRTPSAL;SERCAQYKKDGADFAKWRCVLKIGEHTPSAL	X;X;X;X;X;X;X;X;X;X;X;X;X;X;X;Lactic acid;X;X;X;X;X;X;X;X;X;X;X;X;X;X;X	XXXXXXXXXPPPPPPPPPXXXXXXXXXXXXX	DGADFAK(1)WR	DGADFAK(133.12)WR	7	2	1.586	8406300	8406300	0	0	NaN	1804000	6602300	NaN	NaN	1804000	0	0	6602300	0	0	NaN	NaN	NaN
P05213;P68369;P05214;P68373	40;40;40;40	P05213;P68369;P68373	P68369	Tubulin alpha-1B chain;Tubulin alpha-1A chain;Tubulin alpha-3 chain;Tubulin alpha-1C chain	Tuba1b;Tuba1a;Tuba3a;Tuba1c	sp|P05213|TBA1B_MOUSE Tubulin alpha-1B chain OS=Mus musculus GN=Tuba1b PE=1 SV=2;sp|P68369|TBA1A_MOUSE Tubulin alpha-1A chain OS=Mus musculus GN=Tuba1a PE=1 SV=1;sp|P05214|TBA3_MOUSE Tubulin alpha-3 chain OS=Mus musculus GN=Tuba3a PE=1 SV=1;sp|P68373|TBA1C	1	48.7732	7.91908e-19	114	108.22	48.773	1	100.48	7.91908e-19	114	1	48.7732	0.000495774	48.773		1	K	CLEHGIQPDGQMPSDKTIGGGDDSFNTFFSE	X;X;X;X;X;X;X;X;X;X;X;Oxidation (M);X;X;X;Lactic acid;X;X;X;X;X;X;X;X;X;X;X;X;X;X;X	XXXPPPPPPPPPPPPPPPPPPPPPPPPPPPP	HGIQPDGQMPSDK(1)TIGGGDDSFNTFFSE	HGIQPDGQMPSDK(48.77)TIGGGDDSFNTFFSE	13	3	-0.75325	5411000	5411000	0	0	NaN	2847900	0	NaN	NaN	2847900	0	0	0	0	0	NaN	NaN	NaN
P07901;P11499;E9Q3D6	284;275;62	P07901;P11499	P11499	Heat shock protein HSP 90-alpha;Heat shock protein HSP 90-beta	Hsp90aa1;Hsp90ab1	sp|P07901|HS90A_MOUSE Heat shock protein HSP 90-alpha OS=Mus musculus GN=Hsp90aa1 PE=1 SV=4;sp|P11499|HS90B_MOUSE Heat shock protein HSP 90-beta OS=Mus musculus GN=Hsp90ab1 PE=1 SV=3;tr|E9Q3D6|E9Q3D6_MOUSE Heat shock protein HSP 90-beta (Fragment) OS=Mus m	1	109.664	0.00132997	109.66	86.924	109.66					1	109.664	0.00132997	109.66		1	K	DSGKDKKKKTKKIKEKYIDQEELNKTKPIWT;EKKDGDKKKKKKIKEKYIDQEELNKTKPIWT	X;X;X;X;X;X;X;X;X;X;X;X;X;X;X;Lactic acid;X;X;X;X;X;X;X;X;X;X;X;X;X;X;X	XXXXXXXXXXXXXXPPPPPPPPPPPXXXXXX	EK(1)YIDQEELNK	EK(109.66)YIDQEELNK(-109.66)	2	2	-0.25887	2106800	2106800	0	0	NaN	0	2106800	NaN	NaN	0	0	0	2106800	0	0	NaN	NaN	NaN
P09405;A0A087WRM5	88;72	P09405	P09405	Nucleolin	Ncl	sp|P09405|NUCL_MOUSE Nucleolin OS=Mus musculus GN=Ncl PE=1 SV=2;tr|A0A087WRM5|A0A087WRM5_MOUSE Nucleolin (Fragment) OS=Mus musculus GN=Ncl PE=1 SV=1	0.660841	2.89694	0.00548348	105.39	65.288	89.369	0.660841	2.89694	0.010627	89.369	0.649402	2.67704	0.00548348	105.39		1	K	AVPTPAKKAAVTPGKKAVATPAKKNITPAKV	X;X;X;X;X;X;X;X;X;X;X;X;X;X;X;Lactic acid;X;X;X;X;X;X;X;X;X;X;X;X;X;Lactic acid;X	XXXXXXXXPPPPPPPPXXXXXXXXXXXXXXX	AAVTPGK(0.339)K(0.661)	AAVTPGK(-2.9)K(2.9)	8	2	0.015915	3325400	3325400	0	0	NaN	1048400	2277000	NaN	NaN	1048400	0	0	2277000	0	0	NaN	NaN	NaN
P09405	125	P09405	P09405	Nucleolin	Ncl	sp|P09405|NUCL_MOUSE Nucleolin OS=Mus musculus GN=Ncl PE=1 SV=2	0.636994	2.44221	0.0079311	82.671	42.866	82.671					0.636994	2.44221	0.0079311	82.671		1	K	KGAAQAKALVPTPGKKGAATPAKGAKNGKNA	Lactic acid;X;X;X;X;X;Lactic acid;X;X;X;X;X;X;X;X;Lactic acid;X;X;X;X;X;X;Lactic acid;X;X;X;X;X;X;X;X	XXXXXXXPPPPPPPPPXXXXXXXXXXXXXXX	ALVPTPGK(0.363)K(0.637)	ALVPTPGK(-2.44)K(2.44)	9	2	0.25658	8030300	8030300	0	0	NaN	0	8030300	NaN	NaN	0	0	0	8030300	0	0	NaN	NaN	NaN
P09405	116	P09405	P09405	Nucleolin	Ncl	sp|P09405|NUCL_MOUSE Nucleolin OS=Mus musculus GN=Ncl PE=1 SV=2	1	94.6423	5.00012e-05	147.37	105.37	147.37	0.999992	50.9426	0.00706275	84.687	1	94.6423	5.00012e-05	147.37		1	K	AKVIPTPGKKGAAQAKALVPTPGKKGAATPA	X;Lactic acid;X;X;X;X;X;X;X;Lactic acid;X;X;X;X;X;Lactic acid;X;X;X;X;X;X;X;X;Lactic acid;X;X;X;X;X;X	XXXXXXXXXXPPPPPPPPPPPPPPPXXXXXX	GAAQAK(1)ALVPTPGK	GAAQAK(94.64)ALVPTPGK(-94.64)	6	2	-0.25898	7161300	7161300	0	0	NaN	1178600	4434900	NaN	NaN	1178600	0	0	4434900	0	0	NaN	NaN	NaN
P09405	132	P09405	P09405	Nucleolin	Ncl	sp|P09405|NUCL_MOUSE Nucleolin OS=Mus musculus GN=Ncl PE=1 SV=2	0.5	0	0.0236554	47.082	23.127	47.082	0.5	0	0.0236554	47.082						1	K	ALVPTPGKKGAATPAKGAKNGKNAKKEDSDE	X;X;X;X;X;X;X;X;Lactic acid;X;X;X;X;X;X;Lactic acid;X;X;X;X;X;X;X;X;X;X;X;X;X;X;X	XXXXXXXXXPPPPPPPPPPXXXXXXXXXXXX	GAATPAK(0.5)GAK(0.5)	GAATPAK(0)GAK(0)	7	2	1.4949	0	0	0	0	NaN	0	0	NaN	NaN	0	0	0	0	0	0	NaN	NaN	NaN
P09405	135	P09405	P09405	Nucleolin	Ncl	sp|P09405|NUCL_MOUSE Nucleolin OS=Mus musculus GN=Ncl PE=1 SV=2	0.5	0	0.0236554	47.082	23.127	47.082	0.5	0	0.0236554	47.082						1	K	PTPGKKGAATPAKGAKNGKNAKKEDSDEDED	X;X;X;X;X;Lactic acid;X;X;X;X;X;X;X;X;X;X;X;X;X;X;X;X;X;X;X;X;X;X;X;X;X	XXXXXXXXXXXXXXXXXXXXXXXXXXXXXXX	GAATPAK(0.5)GAK(0.5)	GAATPAK(0)GAK(0)	10	2	1.4949	0	0	0	0	NaN	0	0	NaN	NaN	0	0	0	0	0	0	NaN	NaN	NaN
P09405;A0A087WRM5	63;47	P09405	P09405	Nucleolin	Ncl	sp|P09405|NUCL_MOUSE Nucleolin OS=Mus musculus GN=Ncl PE=1 SV=2;tr|A0A087WRM5|A0A087WRM5_MOUSE Nucleolin (Fragment) OS=Mus musculus GN=Ncl PE=1 SV=1	1	102.002	0.00594111	102	45.281	102	0.999989	49.418	0.0165007	49.418	1	102.002	0.00594111	102		1	K	IPQKKGKKATTTPAKKVVVSQTKKAAVPTPA	X;X;X;X;X;X;X;X;X;X;X;X;X;X;X;Lactic acid;X;X;X;X;X;X;X;Lactic acid;X;X;X;X;X;X;X	XXXXXXXXXXXXXXXPPPPPPPPXXXXXXXX	K(1)VVVSQTK	K(102)VVVSQTK(-102)	1	2	0.12364	1719600	1719600	0	0	NaN	0	1719600	NaN	NaN	0	0	0	1719600	0	0	NaN	NaN	NaN
P09405	102	P09405	P09405	Nucleolin	Ncl	sp|P09405|NUCL_MOUSE Nucleolin OS=Mus musculus GN=Ncl PE=1 SV=2	0.99991	40.4679	0.0054375	93.258	54.954	93.258	0.999862	38.605	0.00679924	90.05	0.99991	40.4679	0.0054375	93.258		1	K	KKAVATPAKKNITPAKVIPTPGKKGAAQAKA	X;Lactic acid;X;X;X;X;X;X;X;X;X;X;X;X;X;Lactic acid;X;X;X;X;X;X;X;Lactic acid;X;X;X;X;X;Lactic acid;X	XXXXXXXXXXPPPPPPPPPPPPPPXXXXXXX	NITPAK(1)VIPTPGK	NITPAK(40.47)VIPTPGK(-40.47)	6	2	0.20207	11713000	11713000	0	0	NaN	2068700	7951500	NaN	NaN	2068700	0	0	7951500	0	0	NaN	NaN	NaN
P09405	110	P09405	P09405	Nucleolin	Ncl	sp|P09405|NUCL_MOUSE Nucleolin OS=Mus musculus GN=Ncl PE=1 SV=2	0.636413	2.43131	0.0182577	76.847	12.043	76.847	0.636413	2.43131	0.0182577	76.847						1	K	KKNITPAKVIPTPGKKGAAQAKALVPTPGKK	X;X;X;X;X;X;X;Lactic acid;X;X;X;X;X;X;X;Lactic acid;X;X;X;X;X;Lactic acid;X;X;X;X;X;X;X;X;Lactic acid	XXXXXXXXPPPPPPPPXXXXXXXXXXXXXXX	VIPTPGK(0.364)K(0.636)	VIPTPGK(-2.43)K(2.43)	8	2	-0.23592	1886700	1886700	0	0	NaN	1886700	0	NaN	NaN	1886700	0	0	0	0	0	NaN	NaN	NaN
P09405	478	P09405	P09405	Nucleolin	Ncl	sp|P09405|NUCL_MOUSE Nucleolin OS=Mus musculus GN=Ncl PE=1 SV=2	1	78.4908	0.00830049	83.397	28.415	83.397					1	78.4908	0.00830049	83.397		1	K	LYYTGEKGQRQERTGKTSTWSGESKTLVLSN	X;X;X;X;X;X;X;X;X;X;X;X;X;X;X;Lactic acid;X;X;X;X;X;X;X;X;X;X;X;X;X;X;X	XXXXXXXXXXXXXPPPPPPPPPPPPXXXXXX	TGK(1)TSTWSGESK	TGK(78.49)TSTWSGESK(-78.49)	3	2	0.39833	2428600	2428600	0	0	NaN	0	2428600	NaN	NaN	0	0	0	2428600	0	0	NaN	NaN	NaN
P09405	230	P09405	P09405	Nucleolin	Ncl	sp|P09405|NUCL_MOUSE Nucleolin OS=Mus musculus GN=Ncl PE=1 SV=2	1	65.9481	0.0215933	87.476	58.327	87.476					1	65.9481	0.0215933	87.476		1	K	EVMEITTAKGKKTPAKVVPMKAKSVAEEEDD	X;X;X;X;X;X;X;X;X;X;X;X;X;X;X;Lactic acid;X;X;X;X;X;X;X;X;X;X;X;X;X;X;X	XXXXXXXXXXXXPPPPPPPPPXXXXXXXXXX	TPAK(1)VVPMK	TPAK(65.95)VVPMK(-65.95)	4	2	1.7747	3249400	3249400	0	0	NaN	0	3249400	NaN	NaN	0	0	0	3249400	0	0	NaN	NaN	NaN
P09405;A0A087WRM5	71;55	P09405	P09405	Nucleolin	Ncl	sp|P09405|NUCL_MOUSE Nucleolin OS=Mus musculus GN=Ncl PE=1 SV=2;tr|A0A087WRM5|A0A087WRM5_MOUSE Nucleolin (Fragment) OS=Mus musculus GN=Ncl PE=1 SV=1	0.656054	2.80449	0.00389299	117.17	78.931	104.45	0.643599	2.56677	0.00389299	117.17	0.656054	2.80449	0.00561081	104.45		1	K	ATTTPAKKVVVSQTKKAAVPTPAKKAAVTPG	X;X;X;X;X;X;X;Lactic acid;X;X;X;X;X;X;X;Lactic acid;X;X;X;X;X;X;X;X;X;X;X;X;X;X;X	XXXXXXXXPPPPPPPPXXXXXXXXXXXXXXX	VVVSQTK(0.344)K(0.656)	VVVSQTK(-2.8)K(2.8)	8	2	0.32252	12432000	12432000	0	0	NaN	1676600	10755000	NaN	NaN	1676600	0	0	10755000	0	0	NaN	NaN	NaN
Q8CBB6;Q8CGP1;Q6ZWY9;Q64478;P10853;P70696;P10854;Q64475;Q9D2U9;Q8CGP0;Q64524;Q64525;Q8CGP2	86;86;86;86;86;87;86;86;86;86;86;86;86	Q8CBB6;P10854;Q64475;Q9D2U9;Q64525;Q8CGP2	Q64475	Histone H2B;Histone H2B type 1-K;Histone H2B type 1-C/E/G;Histone H2B type 1-H;Histone H2B type 1-F/J/L;Histone H2B type 1-A;Histone H2B type 1-M;Histone H2B type 1-B;Histone H2B type 3-A;Histone H2B type 3-B;Histone H2B type 2-E;Histone H2B type 2-B;Histone H2B type 1-P	Hist1h2br;Hist1h2bk;Hist1h2bc;Hist1h2bh;Hist1h2bf;Hist1h2ba;Hist1h2bm;Hist1h2bb;Hist3h2ba;Hist3h2bb;Hist2h2be;Hist2h2bb;Hist1h2bp	tr|Q8CBB6|Q8CBB6_MOUSE Histone H2B OS=Mus musculus GN=Hist1h2bq PE=2 SV=1;sp|Q8CGP1|H2B1K_MOUSE Histone H2B type 1-K OS=Mus musculus GN=Hist1h2bk PE=1 SV=3;sp|Q6ZWY9|H2B1C_MOUSE Histone H2B type 1-C/E/G OS=Mus musculus GN=Hist1h2bc PE=1 SV=3;sp|Q64478|H2B1	1	44.973	0.0285692	44.973	27.733	44.973					1	44.973	0.0285692	44.973			K	FERIAGEASRLAHYNKRSTITSREIQTAVRL;FERIASEASRLAHYNKRSTITSREIQTAVRL;FERIASEASRLAHYNKRSTITSREVQTAVRL	X;X;X;X;X;X;X;X;X;X;X;X;X;X;X;Lactic acid;X;X;X;X;X;X;X;X;X;X;X;X;X;X;X	XXXXXXXXXXPPPPPPPXXXXXXXXXXXXXX	LAHYNK(1)R	LAHYNK(44.97)R	6	2	-0.31617	1064400	1064400	0	0	NaN	0	1064400	NaN	NaN	0	0	0	1064400	0	0	NaN	NaN	NaN
Q8CBB6;Q8CGP1;Q6ZWY9;Q64478;P10853	6;6;6;6;6	Q8CBB6	Q8CBB6	Histone H2B;Histone H2B type 1-K;Histone H2B type 1-C/E/G;Histone H2B type 1-H;Histone H2B type 1-F/J/L	Hist1h2br;Hist1h2bk;Hist1h2bc;Hist1h2bh;Hist1h2bf	tr|Q8CBB6|Q8CBB6_MOUSE Histone H2B OS=Mus musculus GN=Hist1h2bq PE=2 SV=1;sp|Q8CGP1|H2B1K_MOUSE Histone H2B type 1-K OS=Mus musculus GN=Hist1h2bk PE=1 SV=3;sp|Q6ZWY9|H2B1C_MOUSE Histone H2B type 1-C/E/G OS=Mus musculus GN=Hist1h2bc PE=1 SV=3;sp|Q64478|H2B1	1	64.2204	0.00289991	102.52	65.337	102.52	0.999997	55.9715	0.00301631	100.88	1	64.2204	0.00289991	102.52		1	K	__________MPEPAKSAPAPKKGSKKAVTK	X;X;X;X;X;X;X;X;X;X;X;X;X;X;X;Lactic acid;X;X;X;X;X;X;X;X;X;X;X;X;X;X;X	XXXXXXXXXXXPPPPPPPPPPPXXXXXXXXX	PEPAK(1)SAPAPK	PEPAK(64.22)SAPAPK(-64.22)	5	2	-0.096646	529900000	529900000	0	0	NaN	154600000	349290000	NaN	NaN	154600000	0	0	349290000	0	0	NaN	NaN	NaN
P10854	6	P10854	P10854	Histone H2B type 1-M	Hist1h2bm	sp|P10854|H2B1M_MOUSE Histone H2B type 1-M OS=Mus musculus GN=Hist1h2bm PE=1 SV=2	0.999993	51.4893	0.00489438	94.692	43.625	88.681	0.999805	37.1021	0.00489438	94.692	0.999993	51.4893	0.00765933	88.681		1	K	__________MPEPTKSAPAPKKGSKKAVTK	X;X;X;X;X;X;X;X;X;X;X;X;X;X;X;Lactic acid;X;X;X;X;X;X;X;X;X;X;X;X;X;X;X	XXXXXXXXXXXPPPPPPPPPPPXXXXXXXXX	PEPTK(1)SAPAPK	PEPTK(51.49)SAPAPK(-51.49)	5	2	0.057261	76001000	76001000	0	0	NaN	17283000	56966000	NaN	NaN	17283000	0	0	56966000	0	0	NaN	NaN	NaN
P11031	53	P11031	P11031	Activated RNA polymerase II transcriptional coactivator p15	Sub1	sp|P11031|TCP4_MOUSE Activated RNA polymerase II transcriptional coactivator p15 OS=Mus musculus GN=Sub1 PE=1 SV=3	1	127.765	0.00117915	127.76	106.26	127.76	1	87.9133	0.00893654	87.913	1	127.765	0.00117915	127.76		1	K	KKQKPGETSRALASSKQSSSSRDDNMFQIGK	X;X;X;X;X;X;X;X;X;X;X;X;X;X;X;Lactic acid;X;X;X;X;X;X;X;X;X;X;X;X;X;X;X	XXXXXXXXXXPPPPPPPPPPPPXXXXXXXXX	ALASSK(1)QSSSSR	ALASSK(127.76)QSSSSR	6	2	-0.19766	4463000	4463000	0	0	NaN	811790	3651200	NaN	NaN	811790	0	0	3651200	0	0	NaN	NaN	NaN
P14148;F6XI62	20;46	P14148	P14148	60S ribosomal protein L7	Rpl7	sp|P14148|RL7_MOUSE 60S ribosomal protein L7 OS=Mus musculus GN=Rpl7 PE=1 SV=2;tr|F6XI62|F6XI62_MOUSE 60S ribosomal protein L7 (Fragment) OS=Mus musculus GN=Rpl7 PE=1 SV=1	0.593076	1.63597	0.0232388	62.546	27.251	62.546					0.593076	1.63597	0.0232388	62.546		1	K	PEKKKKVATVPGTLKKKVPAGPKTLKKKVPA	X;X;X;X;X;X;X;X;X;X;X;X;X;X;X;Lactic acid;X;X;X;X;X;X;X;X;X;X;X;X;X;X;X	XXXXXXPPPPPPPPPPXXXXXXXXXXXXXXX	VATVPGTLK(0.407)K(0.593)	VATVPGTLK(-1.64)K(1.64)	10	2	0.48175	644320	644320	0	0	NaN	0	644320	NaN	NaN	0	0	0	644320	0	0	NaN	NaN	NaN
P14873	2329	P14873	P14873	Microtubule-associated protein 1B;MAP1B heavy chain;MAP1 light chain LC1	Map1b	sp|P14873|MAP1B_MOUSE Microtubule-associated protein 1B OS=Mus musculus GN=Map1b PE=1 SV=2	1	74.6297	0.00273252	98.353	45.628	98.353	0.999949	42.91	0.00273252	59.542	1	74.6297	0.00327394	98.353		1	K	KETKNAANASASKSAKTATAGPGTTKTAKSS	X;X;X;X;X;X;X;X;X;X;X;X;X;X;X;Lactic acid;X;X;X;X;X;X;X;X;X;X;X;X;X;X;X	XXXXXXXXXXXXXPPPPPPPPPPPPPXXXXX	SAK(1)TATAGPGTTK	SAK(74.63)TATAGPGTTK(-74.63)	3	2	-0.064617	942800	942800	0	0	NaN	0	942800	NaN	NaN	0	0	0	942800	0	0	NaN	NaN	NaN
P17095	7	P17095	P17095	High mobility group protein HMG-I/HMG-Y	Hmga1	sp|P17095|HMGA1_MOUSE High mobility group protein HMG-I/HMG-Y OS=Mus musculus GN=Hmga1 PE=1 SV=4	1	71.3293	0.0123929	81.017	63.197	81.017					1	71.3293	0.0123929	81.017		1	K	_________MSESGSKSSQPLASKQEKDGTE	X;X;X;X;X;X;X;X;X;X;X;X;X;X;X;Lactic acid;X;X;X;X;X;X;X;X;X;X;X;X;X;X;X	XXXXXXXXXXXXPPPPPPPPPPPPXXXXXXX	SGSK(1)SSQPLASK	SGSK(71.33)SSQPLASK(-71.33)	4	2	-1.4756	1187800	1187800	0	0	NaN	0	1187800	NaN	NaN	0	0	0	1187800	0	0	NaN	NaN	NaN
P17426;A0A140LHG0;P17427	6;6;6	P17426;P17427	P17427	AP-2 complex subunit alpha-1;AP-2 complex subunit alpha-2	Ap2a1;Ap2a2	sp|P17426|AP2A1_MOUSE AP-2 complex subunit alpha-1 OS=Mus musculus GN=Ap2a1 PE=1 SV=1;tr|A0A140LHG0|A0A140LHG0_MOUSE AP-2 complex subunit alpha-1 OS=Mus musculus GN=Ap2a1 PE=4 SV=1;sp|P17427|AP2A2_MOUSE AP-2 complex subunit alpha-2 OS=Mus musculus GN=Ap2a2	1	87.3076	0.0139435	87.308	61.571	87.308					1	87.3076	0.0139435	87.308		1	K	__________MPAVSKGDGMRGLAVFISDIR	X;X;X;X;X;X;X;X;X;X;X;X;X;X;X;Lactic acid;X;X;X;X;X;X;X;X;X;X;X;X;X;X;X	XXXXXXXXXXXPPPPPPPPPPXXXXXXXXXX	PAVSK(1)GDGMR	PAVSK(87.31)GDGMR	5	2	0.39184	1474500	1474500	0	0	NaN	0	1474500	NaN	NaN	0	0	0	1474500	0	0	NaN	NaN	NaN
P18608;D3Z607	31;21	P18608	P18608	Non-histone chromosomal protein HMG-14	Hmgn1	sp|P18608|HMGN1_MOUSE Non-histone chromosomal protein HMG-14 OS=Mus musculus GN=Hmgn1 PE=1 SV=2;tr|D3Z607|D3Z607_MOUSE Non-histone chromosomal protein HMG-14 OS=Mus musculus GN=Hmgn1 PE=1 SV=1	0.999698	35.2033	0.00215969	88.37	20.377	88.37	0.998159	28.2555	0.00215969	61.344	0.999698	35.2033	0.0154004	88.37		1	K	PKRRSARLSAKPAPAKVDAKPKKAAGKDKAS	X;X;X;X;X;X;X;X;X;X;X;X;X;X;X;Lactic acid;X;X;X;X;X;X;X;X;X;X;X;X;X;X;X	XXXXXXXXXXXPPPPPPPPPPPXXXXXXXXX	PAPAK(1)VDAK	PAPAK(35.2)VDAK(-35.2)	5	2	-0.23112	4198900	4198900	0	0	NaN	0	3235700	NaN	NaN	0	0	0	3235700	0	0	NaN	NaN	NaN
P18608	13	P18608	P18608	Non-histone chromosomal protein HMG-14	Hmgn1	sp|P18608|HMGN1_MOUSE Non-histone chromosomal protein HMG-14 OS=Mus musculus GN=Hmgn1 PE=1 SV=2	0.997445	25.9149	0.00361386	96.015	56.71	96.015	0.986324	18.5805	0.00633795	88.681	0.997445	25.9149	0.00361386	96.015		1	K	___MPKRKVSADGAAKAEPKRRSARLSAKPA	X;X;X;X;X;X;X;X;X;X;X;X;X;X;X;Lactic acid;X;X;X;X;X;X;X;X;X;X;X;X;X;X;X	XXXXXXXXPPPPPPPPPPPPXXXXXXXXXXX	VSADGAAK(0.997)AEPK(0.003)	VSADGAAK(25.91)AEPK(-25.91)	8	2	0.33782	3127000	3127000	0	0	NaN	738870	2388100	NaN	NaN	738870	0	0	2388100	0	0	NaN	NaN	NaN
P20065	32	P20065	P20065	Thymosin beta-4;Hematopoietic system regulatory peptide	Tmsb4x	sp|P20065|TYB4_MOUSE Thymosin beta-4 OS=Mus musculus GN=Tmsb4x PE=1 SV=1	1	77.5962	3.87216e-05	140.78	117.46	140.78	1	77.5962	3.87216e-05	140.78						1	K	EKFDKSKLKKTETQEKNPLPSKETIEQEKQA	X;X;X;X;X;X;X;X;X;X;X;X;X;X;X;Lactic acid;X;X;X;X;X;Lactic acid;X;X;X;X;X;X;X;X;X	XXXXXXXXXPPPPPPPPPPPPPXXXXXXXXX	TETQEK(1)NPLPSK	TETQEK(77.6)NPLPSK(-77.6)	6	2	0.43795	6786100	6786100	0	0	NaN	2360600	0	NaN	NaN	2360600	0	0	0	0	0	NaN	NaN	NaN
P20065	38	P20065	P20065	Thymosin beta-4;Hematopoietic system regulatory peptide	Tmsb4x	sp|P20065|TYB4_MOUSE Thymosin beta-4 OS=Mus musculus GN=Tmsb4x PE=1 SV=1	0.993	21.5182	0.00125365	112.15	83.749	112.15	0.993	21.5182	0.00125365	112.15						1	K	KLKKTETQEKNPLPSKETIEQEKQAGES___	X;X;X;X;X;X;X;X;X;X;X;X;X;X;X;Lactic acid;X;X;X;X;X;X;X;X;X;X;X;X;X;X;X	XXXXXXXXXXPPPPPPPPPPPPPXXXXXXXX	NPLPSK(0.993)ETIEQEK(0.007)	NPLPSK(21.52)ETIEQEK(-21.52)	6	2	0.62273	4100900	4100900	0	0	NaN	4100900	0	NaN	NaN	4100900	0	0	0	0	0	NaN	NaN	NaN
P20357;G3UZJ2;G3UZV6;Q80ZL4;Q80X35;Q3TLQ0;G3UWW1	1713;225;358;352;351;383;313	P20357;Q80ZL4	P20357	Microtubule-associated protein 2;Microtubule-associated protein	Map2	sp|P20357|MTAP2_MOUSE Microtubule-associated protein 2 OS=Mus musculus GN=Map2 PE=1 SV=2;tr|G3UZJ2|G3UZJ2_MOUSE Microtubule-associated protein (Fragment) OS=Mus musculus GN=Map2 PE=1 SV=8;tr|G3UZV6|G3UZV6_MOUSE Microtubule-associated protein (Fragment) OS=	1	132.094	0.0114661	132.09	45.3	132.09					1	132.094	0.0114661	132.09		1	K	KKIDLSHVTSKCGSLKNIRHRPGGGRVKIES	Lactic acid;X;X;X;X;X;X;X;X;X;X;X;X;X;X;Lactic acid;X;X;X;X;X;X;X;X;X;X;X;X;X;X;X	XXXXXXXXXXXPPPPPPPPXXXXXXXXXXXX	CGSLK(1)NIR	CGSLK(132.09)NIR	5	2	-0.40238	2390300	2390300	0	0	NaN	0	2390300	NaN	NaN	0	0	0	2390300	0	0	NaN	NaN	NaN
P20357;G3UZJ2;Q80ZL4;Q80X35	1698;210;337;336	P20357;Q80ZL4	P20357	Microtubule-associated protein 2;Microtubule-associated protein	Map2	sp|P20357|MTAP2_MOUSE Microtubule-associated protein 2 OS=Mus musculus GN=Map2 PE=1 SV=2;tr|G3UZJ2|G3UZJ2_MOUSE Microtubule-associated protein (Fragment) OS=Mus musculus GN=Map2 PE=1 SV=8;tr|Q80ZL4|Q80ZL4_MOUSE Microtubule-associated protein OS=Mus musculu	0.905723	9.82592	0.00220523	95.502	38.324	95.502					0.905723	9.82592	0.00220523	95.502		1	K	NIKYQPKGGQVQIVTKKIDLSHVTSKCGSLK	X;X;Lactic acid;X;X;X;X;X;X;X;X;X;X;X;X;Lactic acid;X;X;X;X;X;X;X;X;X;Lactic acid;X;X;X;X;Lactic acid	XXXXXXXPPPPPPPPPPXXXXXXXXXXXXXX	GGQVQIVTK(0.906)K(0.094)	GGQVQIVTK(9.83)K(-9.83)	9	2	0.77506	1832200	1832200	0	0	NaN	0	1832200	NaN	NaN	0	0	0	1832200	0	0	NaN	NaN	NaN
P20357;G3UZJ2;G3UZV6;Q80ZL4;Q80X35;Q3TLQ0;G3UWW1	1708;220;353;347;346;378;308	P20357;Q80ZL4	P20357	Microtubule-associated protein 2;Microtubule-associated protein	Map2	sp|P20357|MTAP2_MOUSE Microtubule-associated protein 2 OS=Mus musculus GN=Map2 PE=1 SV=2;tr|G3UZJ2|G3UZJ2_MOUSE Microtubule-associated protein (Fragment) OS=Mus musculus GN=Map2 PE=1 SV=8;tr|G3UZV6|G3UZV6_MOUSE Microtubule-associated protein (Fragment) OS=	0.963655	14.2366	0.00548871	70.529	47.611	50.874					0.963655	14.2366	0.00548871	70.529		1	K	VQIVTKKIDLSHVTSKCGSLKNIRHRPGGGR	X;X;X;X;X;Lactic acid;X;X;X;X;X;X;X;X;X;Lactic acid;X;X;X;X;Lactic acid;X;X;X;X;X;X;X;X;X;X	XXXXXXPPPPPPPPPPPPPPPXXXXXXXXXX	KIDLSHVTSK(0.964)CGSLK(0.036)	K(-47.85)IDLSHVTSK(14.24)CGSLK(-14.24)	10	3	-2.299	6186700	6186700	0	0	NaN	0	4703500	NaN	NaN	0	0	0	4703500	0	0	NaN	NaN	NaN
P20357;Q80ZL4;Q80X35;Q3TLQ0	1762;401;400;432	P20357;Q80ZL4	P20357	Microtubule-associated protein 2;Microtubule-associated protein	Map2	sp|P20357|MTAP2_MOUSE Microtubule-associated protein 2 OS=Mus musculus GN=Map2 PE=1 SV=2;tr|Q80ZL4|Q80ZL4_MOUSE Microtubule-associated protein OS=Mus musculus GN=Map2 PE=1 SV=1;tr|Q80X35|Q80X35_MOUSE Microtubule-associated protein OS=Mus musculus GN=Map2 P	1	73.2601	0.0038007	73.26	27.542	73.26					1	73.2601	0.0038007	73.26		1	K	AHHVPGGGNVKIDSQKLNFREHAKARVDHGA	X;X;X;X;X;X;X;X;X;X;X;X;X;X;X;Lactic acid;X;X;X;X;X;X;X;X;X;X;X;X;X;X;X	XXXXXXXXXXXPPPPPPPPPXXXXXXXXXXX	IDSQK(1)LNFR	IDSQK(73.26)LNFR	5	2	0.72248	0	0	0	0	NaN	0	0	NaN	NaN	0	0	0	0	0	0	NaN	NaN	NaN
P20357;G3UZJ2;G3UZV6;Q80ZL4;Q80X35;Q3TLQ0;G3UWW1	1685;197;299;324;323;324;254	P20357;Q80ZL4	P20357	Microtubule-associated protein 2;Microtubule-associated protein	Map2	sp|P20357|MTAP2_MOUSE Microtubule-associated protein 2 OS=Mus musculus GN=Map2 PE=1 SV=2;tr|G3UZJ2|G3UZJ2_MOUSE Microtubule-associated protein (Fragment) OS=Mus musculus GN=Map2 PE=1 SV=8;tr|G3UZV6|G3UZV6_MOUSE Microtubule-associated protein (Fragment) OS=	0.999935	41.8561	0.00191352	121.83	102.04	121.83					0.999935	41.8561	0.00191352	121.83		1	K	DLKNVKSKIGSTDNIKYQPKGGQVQIVTKKI	X;X;X;X;X;Lactic acid;X;X;X;X;X;X;X;X;X;Lactic acid;X;X;X;X;X;X;X;X;X;X;X;X;Lactic acid;X;X	XXXXXXXXPPPPPPPPPPPPXXXXXXXXXXX	IGSTDNIK(1)YQPK	IGSTDNIK(41.86)YQPK(-41.86)	8	2	0.17928	1662300	1662300	0	0	NaN	0	1662300	NaN	NaN	0	0	0	1662300	0	0	NaN	NaN	NaN
P20357;G3UZJ2;G3UZV6;Q80ZL4;Q80X35;Q3TLQ0;G3UWW1	1675;187;289;314;313;314;244	P20357;Q80ZL4	P20357	Microtubule-associated protein 2;Microtubule-associated protein	Map2	sp|P20357|MTAP2_MOUSE Microtubule-associated protein 2 OS=Mus musculus GN=Map2 PE=1 SV=2;tr|G3UZJ2|G3UZJ2_MOUSE Microtubule-associated protein (Fragment) OS=Mus musculus GN=Map2 PE=1 SV=8;tr|G3UZV6|G3UZV6_MOUSE Microtubule-associated protein (Fragment) OS=	0.553051	0.925068	0.0246742	54.608	33.738	54.608					0.553051	0.925068	0.0246742	54.608			K	QLRLINQPLPDLKNVKSKIGSTDNIKYQPKG	X;X;X;X;X;X;X;X;X;X;X;X;X;X;X;Lactic acid;X;Lactic acid;X;X;X;X;X;X;X;Lactic acid;X;X;X;X;X	XXXPPPPPPPPPPPPPXXXXXXXXXXXXXXX	LINQPLPDLK(0.447)NVK(0.553)	LINQPLPDLK(-0.93)NVK(0.93)	13	2	-0.089083	1144400	1144400	0	0	NaN	0	1144400	NaN	NaN	0	0	0	1144400	0	0	NaN	NaN	NaN
P20357;G3UZJ2;G3UZV6;Q80ZL4;Q80X35;Q3TLQ0;G3UWW1	1644;156;258;283;282;283;213	P20357;Q80ZL4	P20357	Microtubule-associated protein 2;Microtubule-associated protein	Map2	sp|P20357|MTAP2_MOUSE Microtubule-associated protein 2 OS=Mus musculus GN=Map2 PE=1 SV=2;tr|G3UZJ2|G3UZJ2_MOUSE Microtubule-associated protein (Fragment) OS=Mus musculus GN=Map2 PE=1 SV=8;tr|G3UZV6|G3UZV6_MOUSE Microtubule-associated protein (Fragment) OS=	0.572952	1.27642	0.033441	56.258	11.177	56.258					0.572952	1.27642	0.033441	56.258			K	TPGTPKSGILVPSEKKVAIIRTPPKSPATPK	X;X;X;X;X;Lactic acid;X;X;X;X;X;X;X;X;X;Lactic acid;X;X;X;X;X;X;X;X;X;X;X;X;X;X;X	XXXXXXPPPPPPPPPPXXXXXXXXXXXXXXX	SGILVPSEK(0.427)K(0.573)	SGILVPSEK(-1.28)K(1.28)	10	2	-0.729	670170	670170	0	0	NaN	0	670170	NaN	NaN	0	0	0	670170	0	0	NaN	NaN	NaN
P20357;G3UZJ2;G3UZV6;Q80ZL4;Q80X35;Q3TLQ0;G3UWW1	1677;189;291;316;315;316;246	P20357;Q80ZL4	P20357	Microtubule-associated protein 2;Microtubule-associated protein	Map2	sp|P20357|MTAP2_MOUSE Microtubule-associated protein 2 OS=Mus musculus GN=Map2 PE=1 SV=2;tr|G3UZJ2|G3UZJ2_MOUSE Microtubule-associated protein (Fragment) OS=Mus musculus GN=Map2 PE=1 SV=8;tr|G3UZV6|G3UZV6_MOUSE Microtubule-associated protein (Fragment) OS=	0.999998	56.4315	0.0198335	56.432	9.3646	56.432					0.999998	56.4315	0.0198335	56.432			K	RLINQPLPDLKNVKSKIGSTDNIKYQPKGGQ	X;X;X;X;X;X;X;X;X;X;X;X;X;Lactic acid;X;Lactic acid;X;X;X;X;X;X;X;Lactic acid;X;X;X;X;X;X;X	XXXXXXXXXXXXXXPPPPPPPPPPXXXXXXX	SK(1)IGSTDNIK	SK(56.43)IGSTDNIK(-56.43)	2	2	0.56347	2062000	2062000	0	0	NaN	0	2062000	NaN	NaN	0	0	0	2062000	0	0	NaN	NaN	NaN
P20357;G3UZJ2;G3UZV6;Q80ZL4;Q80X35;Q3TLQ0;G3UWW1	1634;146;248;273;272;273;203	P20357;Q80ZL4	P20357	Microtubule-associated protein 2;Microtubule-associated protein	Map2	sp|P20357|MTAP2_MOUSE Microtubule-associated protein 2 OS=Mus musculus GN=Map2 PE=1 SV=2;tr|G3UZJ2|G3UZJ2_MOUSE Microtubule-associated protein (Fragment) OS=Mus musculus GN=Map2 PE=1 SV=8;tr|G3UZV6|G3UZV6_MOUSE Microtubule-associated protein (Fragment) OS=	1	65.6245	0.00108948	99.5	64.276	99.5					1	65.6245	0.00108948	99.5		1	K	GTPGTPSYPRTPGTPKSGILVPSEKKVAIIR	X;X;X;X;X;X;X;X;X;X;X;X;X;X;X;Lactic acid;X;X;X;X;X;X;X;X;X;Lactic acid;X;X;X;X;X	XXXXXXXXXXPPPPPPPPPPPPPPPXXXXXX	TPGTPK(1)SGILVPSEK	TPGTPK(65.62)SGILVPSEK(-65.62)	6	2	-0.076055	1353300	1353300	0	0	NaN	0	1353300	NaN	NaN	0	0	0	1353300	0	0	NaN	NaN	NaN
Q9DCC5;P23198;D3Z1A9;D3Z313	5;5;5;5	Q9DCC5	Q9DCC5	Chromobox protein homolog 3	Cbx3	tr|Q9DCC5|Q9DCC5_MOUSE Cbx3 protein OS=Mus musculus GN=Cbx3 PE=1 SV=1;sp|P23198|CBX3_MOUSE Chromobox protein homolog 3 OS=Mus musculus GN=Cbx3 PE=1 SV=2;tr|D3Z1A9|D3Z1A9_MOUSE Chromobox protein homolog 3 OS=Mus musculus GN=Cbx3 PE=1 SV=1;tr|D3Z313|D3Z313_M	1	109.159	1.1932e-06	173.73	76.633	173.73	1	85.4644	0.000200619	126.24	1	109.159	1.1932e-06	173.73		1	K	___________MASNKTTLQKMGKKQNGKSK	X;X;X;X;X;X;X;X;X;X;X;X;X;X;X;Lactic acid;X;X;X;X;Lactic acid;Oxidation (M);X;X;X;X;X;X;X;X;X	XXXXXXXXXXXXPPPPPPPPPXXXXXXXXXX	ASNK(1)TTLQK	ASNK(109.16)TTLQK(-109.16)	4	2	-0.017293	39710000	39710000	0	0	NaN	3891200	35818000	NaN	NaN	3891200	0	0	35818000	0	0	NaN	NaN	NaN
Q9DCC5;P23198;D3Z1A9;D3Z313	10;10;10;10	Q9DCC5	Q9DCC5	Chromobox protein homolog 3	Cbx3	tr|Q9DCC5|Q9DCC5_MOUSE Cbx3 protein OS=Mus musculus GN=Cbx3 PE=1 SV=1;sp|P23198|CBX3_MOUSE Chromobox protein homolog 3 OS=Mus musculus GN=Cbx3 PE=1 SV=2;tr|D3Z1A9|D3Z1A9_MOUSE Chromobox protein homolog 3 OS=Mus musculus GN=Cbx3 PE=1 SV=1;tr|D3Z313|D3Z313_M	0.999713	35.4248	0.00329143	107.66	26.024	107.66	0.999713	35.4248	0.0175007	107.66	0.999323	31.6929	0.00329143	94.407		1	K	______MASNKTTLQKMGKKQNGKSKKVEEA	X;X;X;X;X;X;X;X;X;X;X;X;X;X;X;Lactic acid;Oxidation (M);X;X;X;X;X;X;X;X;X;X;X;X;X;X	XXXXXXXXXXXPPPPPPPPXXXXXXXXXXXX	TTLQK(1)MGK	TTLQK(35.42)MGK(-35.42)	5	2	0.12323	95138000	95138000	0	0	NaN	3675300	86211000	NaN	NaN	3675300	0	0	86211000	0	0	NaN	NaN	NaN
P26350;A0A087WP98;A0A087WPN6	15;15;15	P26350	P26350	Prothymosin alpha;Prothymosin alpha, N-terminally processed;Thymosin alpha	Ptma	sp|P26350|PTMA_MOUSE Prothymosin alpha OS=Mus musculus GN=Ptma PE=1 SV=2;tr|A0A087WP98|A0A087WP98_MOUSE Prothymosin alpha OS=Mus musculus GN=Ptma PE=1 SV=1;tr|A0A087WPN6|A0A087WPN6_MOUSE Prothymosin alpha OS=Mus musculus GN=Ptma PE=1 SV=1	0.999583	33.7985	4.00457e-11	170.07	145.77	170.07	0.999583	33.7985	4.00457e-11	170.07						1	K	_MSDAAVDTSSEITTKDLKEKKEVVEEAENG	X;X;X;X;X;X;X;X;X;X;X;X;X;X;X;Lactic acid;X;X;X;X;X;X;X;X;X;X;X;X;X;X;X	XXPPPPPPPPPPPPPPPPPXXXXXXXXXXXX	SDAAVDTSSEITTK(1)DLK	SDAAVDTSSEITTK(33.8)DLK(-33.8)	14	2	0.6971	1338300	1338300	0	0	NaN	1338300	0	NaN	NaN	1338300	0	0	0	0	0	NaN	NaN	NaN
P26350	104	P26350	P26350	Prothymosin alpha;Prothymosin alpha, N-terminally processed;Thymosin alpha	Ptma	sp|P26350|PTMA_MOUSE Prothymosin alpha OS=Mus musculus GN=Ptma PE=1 SV=2	0.558685	1.02417	0.00276428	86.313	77.051	86.313					0.558685	1.02417	0.00276428	86.313		1	K	KRVAEDDEDDDVDTKKQKTEEDD________	X;X;X;X;X;X;X;X;X;X;X;X;X;X;X;Lactic acid;X;X;X;X;X;X;X;X;X;X;X;X;X;X;X	XXPPPPPPPPPPPPPPXXXXXXXXXXXXXXX	VAEDDEDDDVDTK(0.441)K(0.559)	VAEDDEDDDVDTK(-1.02)K(1.02)	14	2	-0.96203	803670	803670	0	0	0.013818	0	803670	0	0.033729	0	0	0	803670	0	0	NaN	NaN	NaN
P26443	503	P26443	P26443	Glutamate dehydrogenase 1, mitochondrial	Glud1	sp|P26443|DHE3_MOUSE Glutamate dehydrogenase 1, mitochondrial OS=Mus musculus GN=Glud1 PE=1 SV=1	1	104.609	1.64622e-08	104.61	83.376	104.61					1	104.609	1.64622e-08	104.61		1	K	VPTAEFQDRISGASEKDIVHSGLAYTMERSA	X;X;X;X;X;X;X;X;X;X;X;X;X;X;X;Lactic acid;X;X;X;X;X;X;X;X;X;X;X;X;X;X;X	XXXXXXXXXPPPPPPPPPPPPPPPPPPPPXX	ISGASEK(1)DIVHSGLAYTMER	ISGASEK(104.61)DIVHSGLAYTMER	7	3	0.82765	1455400	1455400	0	0	NaN	0	1455400	NaN	NaN	0	0	0	1455400	0	0	NaN	NaN	NaN
P27612;F7D1R5	529;136	P27612	P27612	Phospholipase A-2-activating protein	Plaa	sp|P27612|PLAP_MOUSE Phospholipase A-2-activating protein OS=Mus musculus GN=Plaa PE=1 SV=4;tr|F7D1R5|F7D1R5_MOUSE Phospholipase A-2-activating protein (Fragment) OS=Mus musculus GN=Plaa PE=1 SV=1	0.999996	54.1744	0.00365487	97.456	76.457	97.456					0.999996	54.1744	0.00365487	97.456		1	K	VDPFTGNSAYRSAASKTVNIYFPKKEALTFD	X;X;X;X;X;X;X;X;X;X;X;X;X;X;X;Lactic acid;X;X;X;X;X;X;X;X;X;X;X;X;X;X;X	XXXXXXXXXXXPPPPPPPPPPPPPXXXXXXX	SAASK(1)TVNIYFPK	SAASK(54.17)TVNIYFPK(-54.17)	5	2	-0.2847	1204100	1204100	0	0	NaN	0	1204100	NaN	NaN	0	0	0	1204100	0	0	NaN	NaN	NaN
P47857	678	P47857	P47857	ATP-dependent 6-phosphofructokinase, muscle type	Pfkm	sp|P47857|PFKAM_MOUSE ATP-dependent 6-phosphofructokinase, muscle type OS=Mus musculus GN=Pfkm PE=1 SV=3	0.809751	6.29029	0.0122736	52.716	36.513	52.716					0.809751	6.29029	0.0122736	52.716			K	QQGGSPTPFDRNFATKMGAKAMNWMSGKIKE	X;X;X;X;X;X;X;X;X;X;X;X;X;X;X;Lactic acid;Oxidation (M);X;X;X;X;X;X;X;X;X;X;X;X;X;X	XXXXXXXXXXXPPPPPPPPPXXXXXXXXXXX	NFATK(0.81)MGAK(0.19)	NFATK(6.29)MGAK(-6.29)	5	2	-0.15157	838330	838330	0	0	NaN	0	838330	NaN	NaN	0	0	0	838330	0	0	NaN	NaN	NaN
P47962	277	P47962	P47962	60S ribosomal protein L5	Rpl5	sp|P47962|RL5_MOUSE 60S ribosomal protein L5 OS=Mus musculus GN=Rpl5 PE=1 SV=3	0.627875	2.27184	0.00586921	75.311	36.505	75.311					0.627875	2.27184	0.00586921	75.311		1	K	KKKRWNRPKMSLAQKKDRVAQKKASFLRAQE	X;X;X;X;X;X;X;X;X;X;X;X;X;X;X;Lactic acid;X;X;X;X;X;X;X;X;X;X;X;X;X;X;X	XXXXXXXXXPPPPPPPXXXXXXXXXXXXXXX	MSLAQK(0.372)K(0.628)	MSLAQK(-2.27)K(2.27)	7	2	0.87407	0	0	0	0	NaN	0	0	NaN	NaN	0	0	0	0	0	0	NaN	NaN	NaN
P48962	147	P48962	P48962	ADP/ATP translocase 1	Slc25a4	sp|P48962|ADT1_MOUSE ADP/ATP translocase 1 OS=Mus musculus GN=Slc25a4 PE=1 SV=4	1	74.8411	0.024373	74.841	43.419	74.841	1	74.8411	0.024373	74.841						1	K	YPLDFARTRLAADVGKGSSQREFNGLGDCLT	X;X;X;X;X;X;X;X;X;X;X;X;X;X;X;Lactic acid;X;X;X;X;X;X;X;X;X;X;X;X;X;X;X	XXXXXXXXXPPPPPPPPPPPPXXXXXXXXXX	LAADVGK(1)GSSQR	LAADVGK(74.84)GSSQR	7	2	2.1165	571020	571020	0	0	NaN	571020	0	NaN	NaN	571020	0	0	0	0	0	NaN	NaN	NaN
P54227;D3Z5N2	119;119	P54227	P54227	Stathmin	Stmn1	sp|P54227|STMN1_MOUSE Stathmin OS=Mus musculus GN=Stmn1 PE=1 SV=2;tr|D3Z5N2|D3Z5N2_MOUSE Stathmin OS=Mus musculus GN=Stmn1 PE=1 SV=1	1	123.86	0.00107195	123.86	63.424	123.86	1	80.7549	0.00809697	80.755	1	123.86	0.00107195	123.86		1	K	KMEANKENREAQMAAKLERLREKDKHVEEVR	Lactic acid;X;X;X;X;X;X;X;X;X;X;X;X;X;X;Lactic acid;X;X;X;X;X;X;X;X;X;X;X;X;X;X;X	XXXXXXXXXPPPPPPPPPPXXXXXXXXXXXX	EAQMAAK(1)LER	EAQMAAK(123.86)LER	7	2	-0.24477	15983000	15983000	0	0	NaN	3883900	12099000	NaN	NaN	3883900	0	0	12099000	0	0	NaN	NaN	NaN
P54227;D3Z5N2	104;104	P54227	P54227	Stathmin	Stmn1	sp|P54227|STMN1_MOUSE Stathmin OS=Mus musculus GN=Stmn1 PE=1 SV=2;tr|D3Z5N2|D3Z5N2_MOUSE Stathmin OS=Mus musculus GN=Stmn1 PE=1 SV=1	0.999995	53.2431	0.0115861	73.233	60.617	73.233	0.999995	53.2431	0.0115861	73.233	0.999982	47.5582	0.0317718	56.916		1	K	ENNNFSKMAEEKLTHKMEANKENREAQMAAK	X;X;X;X;X;X;Lactic acid;X;X;X;X;X;X;X;X;Lactic acid;X;X;X;X;X;X;X;X;X;X;X;X;X;X;Lactic acid	XXXXXXXXXXXXPPPPPPPPPXXXXXXXXXX	LTHK(1)MEANK	LTHK(53.24)MEANK(-53.24)	4	3	-0.48448	5972200	5972200	0	0	NaN	2871000	3101200	NaN	NaN	2871000	0	0	3101200	0	0	NaN	NaN	NaN
P54227;D3Z5N2;D3Z1Z8;P55821	95;95;95;129	P54227;P55821	P54227	Stathmin;Stathmin-2	Stmn1;Stmn2	sp|P54227|STMN1_MOUSE Stathmin OS=Mus musculus GN=Stmn1 PE=1 SV=2;tr|D3Z5N2|D3Z5N2_MOUSE Stathmin OS=Mus musculus GN=Stmn1 PE=1 SV=1;tr|D3Z1Z8|D3Z1Z8_MOUSE Stathmin (Fragment) OS=Mus musculus GN=Stmn1 PE=1 SV=1;sp|P55821|STMN2_MOUSE Stathmin-2 OS=Mus muscu	0.999989	49.6718	0.000115963	144.77	102.79	144.77					0.999989	49.6718	0.000115963	144.77		1	K	KEVLQKAIEENNNFSKMAEEKLTHKMEANKE;REVLQKALEENNNFSKMAEEKLILKMEQIKE	X;X;X;X;X;X;X;X;X;X;X;X;X;X;X;Lactic acid;X;X;X;X;X;X;X;X;Lactic acid;X;X;X;X;X;X	XXXXXXXXXXPPPPPPPPPPPXXXXXXXXXX	NNNFSK(1)MAEEK	NNNFSK(49.67)MAEEK(-49.67)	6	2	-0.36128	5531500	5531500	0	0	NaN	0	5531500	NaN	NaN	0	0	0	5531500	0	0	NaN	NaN	NaN
P54227;D3Z5N2;D3Z1Z8	29;29;29	P54227	P54227	Stathmin	Stmn1	sp|P54227|STMN1_MOUSE Stathmin OS=Mus musculus GN=Stmn1 PE=1 SV=2;tr|D3Z5N2|D3Z5N2_MOUSE Stathmin OS=Mus musculus GN=Stmn1 PE=1 SV=1;tr|D3Z1Z8|D3Z1Z8_MOUSE Stathmin (Fragment) OS=Mus musculus GN=Stmn1 PE=1 SV=1	1	85.2884	0.00508869	85.288	67.424	85.288					1	85.2884	0.00508869	85.288		1	K	RASGQAFELILSPRSKESVPDFPLSPPKKKD	X;X;X;X;X;X;X;X;X;X;X;X;X;X;X;Lactic acid;X;X;X;X;X;X;X;X;X;X;X;X;X;X;X	XXXXXXXXXXXXXXPPPPPPPPPPPPPPXXX	SK(1)ESVPDFPLSPPK	SK(85.29)ESVPDFPLSPPK(-85.29)	2	2	-1.2802	1180100	1180100	0	0	0.23789	0	1180100	0	NaN	0	0	0	1180100	0	0	NaN	NaN	NaN
P54227;D3Z5N2;D3Z1Z8	70;70;70	P54227	P54227	Stathmin	Stmn1	sp|P54227|STMN1_MOUSE Stathmin OS=Mus musculus GN=Stmn1 PE=1 SV=2;tr|D3Z5N2|D3Z5N2_MOUSE Stathmin OS=Mus musculus GN=Stmn1 PE=1 SV=1;tr|D3Z1Z8|D3Z1Z8_MOUSE Stathmin (Fragment) OS=Mus musculus GN=Stmn1 PE=1 SV=1	1	81.4876	0.0125118	109.01	39.623	109.01					1	81.4876	0.0125118	109.01		1	K	EAAEERRKSHEAEVLKQLAEKREHEKEVLQK	X;X;X;X;X;X;X;X;X;X;X;X;X;X;X;Lactic acid;X;X;X;X;X;X;X;X;X;X;X;X;X;X;X	XXXXXXXXXXXXXPPPPPPPPXXXXXXXXXX	VLK(1)QLAEK	VLK(81.49)QLAEK(-81.49)	3	2	-0.28503	1687000	1687000	0	0	NaN	0	1687000	NaN	NaN	0	0	0	1687000	0	0	NaN	NaN	NaN
P55264	10	P55264	P55264	Adenosine kinase	Adk	sp|P55264|ADK_MOUSE Adenosine kinase OS=Mus musculus GN=Adk PE=1 SV=2	0.85522	10.0352	0.0257996	88.37	66.906	88.37					0.85522	10.0352	0.0257996	88.37		1	K	______MAAADEPKPKKLKVEAPQALSENVL	X;X;X;X;X;X;X;X;X;X;X;X;X;X;X;Lactic acid;X;X;X;X;X;X;X;X;X;X;X;X;X;X;X	XXXXXXXPPPPPPPPPPXXXXXXXXXXXXXX	AAADEPK(0.085)PK(0.855)K(0.06)	AAADEPK(-10.04)PK(10.04)K(-11.54)	9	2	-0.2058	1100700	1100700	0	0	NaN	0	1100700	NaN	NaN	0	0	0	1100700	0	0	NaN	NaN	NaN
P57784	172	P57784	P57784	U2 small nuclear ribonucleoprotein A'	Snrpa1	sp|P57784|RU2A_MOUSE U2 small nuclear ribonucleoprotein A' OS=Mus musculus GN=Snrpa1 PE=1 SV=2	1	106.683	0.00429209	106.68	51.153	106.68					1	106.683	0.00429209	106.68		1	K	EAEKMFKGKRGAQLAKDIARRSKTFNPGAGL	X;X;X;X;X;X;X;X;X;X;X;X;X;X;X;Lactic acid;X;X;X;X;X;X;Lactic acid;X;X;X;X;X;X;X;X	XXXXXXXXXXPPPPPPPPPPXXXXXXXXXXX	GAQLAK(1)DIAR	GAQLAK(106.68)DIAR	6	2	-0.68453	1935700	1935700	0	0	NaN	0	1935700	NaN	NaN	0	0	0	1935700	0	0	NaN	NaN	NaN
P57784	179	P57784	P57784	U2 small nuclear ribonucleoprotein A'	Snrpa1	sp|P57784|RU2A_MOUSE U2 small nuclear ribonucleoprotein A' OS=Mus musculus GN=Snrpa1 PE=1 SV=2	1	127.559	0.00137114	127.56	91.134	127.56					1	127.559	0.00137114	127.56		1	K	GKRGAQLAKDIARRSKTFNPGAGLPTDKKKG	X;X;X;X;X;X;X;X;Lactic acid;X;X;X;X;X;X;Lactic acid;X;X;X;X;X;X;X;X;X;X;X;X;X;X;X	XXXXXXXXXXXXXXPPPPPPPPPPPPPPXXX	SK(1)TFNPGAGLPTDK	SK(127.56)TFNPGAGLPTDK(-127.56)	2	2	-0.09929	1566800	1566800	0	0	NaN	0	1566800	NaN	NaN	0	0	0	1566800	0	0	NaN	NaN	NaN
P60335	115	P60335	P60335	Poly(rC)-binding protein 1	Pcbp1	sp|P60335|PCBP1_MOUSE Poly(rC)-binding protein 1 OS=Mus musculus GN=Pcbp1 PE=1 SV=1	0.980565	17.0289	2.25395e-05	112.43	99.002	112.43	0.898286	9.46032	0.0232227	43.408	0.980565	17.0289	2.25395e-05	112.43		1	K	LRLVVPATQCGSLIGKGGCKIKEIRESTGAQ	X;X;X;X;X;X;X;X;X;X;X;X;X;X;X;Lactic acid;X;X;X;X;X;X;X;X;X;X;X;X;X;X;X	XXPPPPPPPPPPPPPPPPPPXXXXXXXXXXX	LVVPATQCGSLIGK(0.981)GGCK(0.019)	LVVPATQCGSLIGK(17.03)GGCK(-17.03)	14	2	-0.71209	7051600	7051600	0	0	NaN	1596800	3694500	NaN	NaN	1596800	0	0	3694500	0	0	NaN	NaN	NaN
P60710;E9Q5F4;E9Q606;V9GXQ2;P63260;G3UZ07;G3UYG0;P68134;P68033;P63268;P62737;D3Z2K3;D3YZY0	61;61;64;37;61;118;61;63;63;62;63;62;62	P60710;P63260;P68134	P63260	Actin, cytoplasmic 1;Actin, cytoplasmic 1, N-terminally processed;Actin, cytoplasmic 2;Actin, cytoplasmic 2, N-terminally processed;Actin, alpha skeletal muscle;Actin, alpha cardiac muscle 1;Actin, gamma-enteric smooth muscle;Actin, aortic smooth muscle	Actb;Gm17087;Actg1;Acta1;Actc1;Actg2;Acta2	sp|P60710|ACTB_MOUSE Actin, cytoplasmic 1 OS=Mus musculus GN=Actb PE=1 SV=1;tr|E9Q5F4|E9Q5F4_MOUSE Actin, cytoplasmic 1 (Fragment) OS=Mus musculus GN=Actb PE=1 SV=1;tr|E9Q606|E9Q606_MOUSE Actin, cytoplasmic 1 (Fragment) OS=Mus musculus GN=Actb PE=1 SV=1;tr	1	135.859	0.000131676	135.86	108.97	135.86					1	135.859	0.000131676	135.86		1	K	GMGQKDSYVGDEAQSKRGILTLKYPIEHGII;GMGQKDSYVGDEAQSKRGILTLKYPIEHGIV	X;X;X;X;X;X;X;X;X;X;X;X;X;X;X;Lactic acid;X;X;X;X;X;X;X;X;X;X;X;X;X;X;X	XXXXXPPPPPPPPPPPPXXXXXXXXXXXXXX	DSYVGDEAQSK(1)R	DSYVGDEAQSK(135.86)R	11	2	-0.12326	4343300	4343300	0	0	4.1498	0	4343300	0	NaN	0	0	0	4343300	0	0	NaN	NaN	NaN
P60710;E9Q5F4;E9Q606;P63260;G3UZ07;G3UYG0;P68134;P68033;P63268;P62737;D3Z2K3;D3YZY0	50;50;53;50;107;50;52;52;51;52;51;51	P60710;P63260;P68134	P63260	Actin, cytoplasmic 1;Actin, cytoplasmic 1, N-terminally processed;Actin, cytoplasmic 2;Actin, cytoplasmic 2, N-terminally processed;Actin, alpha skeletal muscle;Actin, alpha cardiac muscle 1;Actin, gamma-enteric smooth muscle;Actin, aortic smooth muscle	Actb;Actg1;Acta1;Actc1;Actg2;Acta2	sp|P60710|ACTB_MOUSE Actin, cytoplasmic 1 OS=Mus musculus GN=Actb PE=1 SV=1;tr|E9Q5F4|E9Q5F4_MOUSE Actin, cytoplasmic 1 (Fragment) OS=Mus musculus GN=Actb PE=1 SV=1;tr|E9Q606|E9Q606_MOUSE Actin, cytoplasmic 1 (Fragment) OS=Mus musculus GN=Actb PE=1 SV=1;sp	1	64.8931	2.43769e-07	97.69	89.502	97.69					1	64.8931	2.43769e-07	97.69		1	K	VGRPRHQGVMVGMGQKDSYVGDEAQSKRGIL	X;X;X;X;X;X;X;X;X;Oxidation (M);X;X;Oxidation (M);X;X;Lactic acid;X;X;X;X;X;X;X;X;X;X;Lactic acid;X;X;X;X	XXXXXPPPPPPPPPPPPPPPPPPPPPPXXXX	HQGVMVGMGQK(1)DSYVGDEAQSK	HQGVMVGMGQK(64.89)DSYVGDEAQSK(-64.89)	11	3	-0.07502	5784300	5784300	0	0	NaN	0	3108400	NaN	NaN	0	0	0	3108400	0	0	NaN	NaN	NaN
P60710;E9Q1F2;P63260;B1ATY1;P68134;P68033;P63268;P62737;Q8BFZ3	328;248;328;106;330;330;329;330;329	P60710;P63260;P68134;Q8BFZ3	P63260	Actin, cytoplasmic 1;Actin, cytoplasmic 1, N-terminally processed;Actin, cytoplasmic 2;Actin, cytoplasmic 2, N-terminally processed;Actin, alpha skeletal muscle;Actin, alpha cardiac muscle 1;Actin, gamma-enteric smooth muscle;Actin, aortic smooth muscle;Beta-actin-like protein 2	Actb;Actg1;Acta1;Actc1;Actg2;Acta2;Actbl2	sp|P60710|ACTB_MOUSE Actin, cytoplasmic 1 OS=Mus musculus GN=Actb PE=1 SV=1;tr|E9Q1F2|E9Q1F2_MOUSE Actin, cytoplasmic 1 OS=Mus musculus GN=Actb PE=1 SV=1;sp|P63260|ACTG_MOUSE Actin, cytoplasmic 2 OS=Mus musculus GN=Actg1 PE=1 SV=1;tr|B1ATY1|B1ATY1_MOUSE Ac	1	97.4306	0.00799384	97.431	41.754	97.431					1	97.4306	0.00799384	97.431		1	K	MQKEITALAPSTMKIKIIAPPERKYSVWIGG;MQKEIVTLAPSTMKIKIIAPPERKYSVWIGG	X;X;X;X;X;X;X;X;X;X;X;X;Oxidation (M);X;X;Lactic acid;X;X;X;X;X;X;X;X;X;X;X;X;X;X;X	XXXXXXXXXXXXXXPPPPPPPPPXXXXXXXX	IK(1)IIAPPER	IK(97.43)IIAPPER	2	2	0.076816	3911400	3911400	0	0	NaN	0	3911400	NaN	NaN	0	0	0	3911400	0	0	NaN	NaN	NaN
P60710;E9Q5F4;E9Q606;P63260;G3UZ07;G3UYG0	113;113;116;113;170;113	P60710;P63260	P63260	Actin, cytoplasmic 1;Actin, cytoplasmic 1, N-terminally processed;Actin, cytoplasmic 2;Actin, cytoplasmic 2, N-terminally processed	Actb;Actg1	sp|P60710|ACTB_MOUSE Actin, cytoplasmic 1 OS=Mus musculus GN=Actb PE=1 SV=1;tr|E9Q5F4|E9Q5F4_MOUSE Actin, cytoplasmic 1 (Fragment) OS=Mus musculus GN=Actb PE=1 SV=1;tr|E9Q606|E9Q606_MOUSE Actin, cytoplasmic 1 (Fragment) OS=Mus musculus GN=Actb PE=1 SV=1;sp	1	67.9947	7.03771e-05	67.995	46.989	67.995					1	67.9947	7.03771e-05	67.995		1	K	PEEHPVLLTEAPLNPKANREKMTQIMFETFN	X;X;X;X;X;X;X;X;X;X;X;X;X;X;X;Lactic acid;X;X;X;X;X;X;X;X;X;X;X;X;X;X;X	PPPPPPPPPPPPPPPPPPPXXXXXXXXXXXX	VAPEEHPVLLTEAPLNPK(1)ANR	VAPEEHPVLLTEAPLNPK(67.99)ANR	18	3	0.067193	1367300	1367300	0	0	NaN	0	1367300	NaN	NaN	0	0	0	1367300	0	0	NaN	NaN	NaN
P62309	3	P62309	P62309	Small nuclear ribonucleoprotein G	Snrpg	sp|P62309|RUXG_MOUSE Small nuclear ribonucleoprotein G OS=Mus musculus GN=Snrpg PE=1 SV=1	0.999993	51.2762	0.0116674	51.276	19.321	51.276					0.999993	51.2762	0.0116674	51.276		1	K	_____________MSKAHPPELKKFMDKKLS	X;X;X;X;X;X;X;X;X;X;X;X;X;X;X;Lactic acid;X;X;X;X;X;X;X;X;X;X;X;X;X;X;X	XXXXXXXXXXXXXXPPPPPPPPPXXXXXXXX	SK(1)AHPPELK	SK(51.28)AHPPELK(-51.28)	2	2	0.99511	837190	837190	0	0	NaN	0	837190	NaN	NaN	0	0	0	837190	0	0	NaN	NaN	NaN
P62806	13	P62806	P62806	Histone H4	Hist1h4a	sp|P62806|H4_MOUSE Histone H4 OS=Mus musculus GN=Hist1h4a PE=1 SV=2	0.999951	43.1083	0.00580591	76.847	23.495	76.847	0.999951	43.1083	0.00580591	76.847						1	K	___MSGRGKGGKGLGKGGAKRHRKVLRDNIQ	X;X;X;X;X;X;X;X;X;X;X;X;X;X;X;Lactic acid;X;X;X;X;X;X;X;X;X;X;X;X;X;X;X	XXXXXXXXXXXXPPPPPPPPXXXXXXXXXXX	GLGK(1)GGAK	GLGK(43.11)GGAK(-43.11)	4	2	-0.085404	0	0	0	0	NaN	0	0	NaN	NaN	0	0	0	0	0	0	NaN	NaN	NaN
P70677;A0A1B0GRX1	57;57	P70677	P70677	Caspase-3;Caspase-3 subunit p17;Caspase-3 subunit p12	Casp3	sp|P70677|CASP3_MOUSE Caspase-3 OS=Mus musculus GN=Casp3 PE=1 SV=1;tr|A0A1B0GRX1|A0A1B0GRX1_MOUSE Caspase-3 OS=Mus musculus GN=Casp3 PE=4 SV=1	1	101.349	0.00120391	101.35	93.484	101.35					1	101.349	0.00120391	101.35		1	K	PEMGICIIINNKNFHKSTGMSSRSGTDVDAA	X;X;Oxidation (M);X;X;X;X;X;X;X;X;X;X;X;X;Lactic acid;X;X;X;X;X;X;X;X;X;X;X;X;X;X;X	XXXXXXXXXXXXPPPPPPPPPPPXXXXXXXX	NFHK(1)STGMSSR	NFHK(101.35)STGMSSR	4	3	-0.61099	10729000	10729000	0	0	NaN	0	10729000	NaN	NaN	0	0	0	10729000	0	0	NaN	NaN	NaN
P70677;A0A1B0GRX1	11;11	P70677	P70677	Caspase-3;Caspase-3 subunit p17;Caspase-3 subunit p12	Casp3	sp|P70677|CASP3_MOUSE Caspase-3 OS=Mus musculus GN=Casp3 PE=1 SV=1;tr|A0A1B0GRX1|A0A1B0GRX1_MOUSE Caspase-3 OS=Mus musculus GN=Casp3 PE=4 SV=1	0.999959	43.8283	0.00599967	81.525	55.482	81.525	0.999959	43.8283	0.00599967	81.525						1	K	_____MENNKTSVDSKSINNFEVKTIHGSKS	X;X;X;X;X;X;X;X;X;X;X;X;X;X;X;Lactic acid;X;X;X;X;X;X;X;X;X;X;X;X;X;X;X	XXXXXXXXXXPPPPPPPPPPPPPPXXXXXXX	TSVDSK(1)SINNFEVK	TSVDSK(43.83)SINNFEVK(-43.83)	6	2	-0.17741	480230	480230	0	0	NaN	480230	0	NaN	NaN	480230	0	0	0	0	0	NaN	NaN	NaN
P97315	112	P97315	P97315	Cysteine and glycine-rich protein 1	Csrp1	sp|P97315|CSRP1_MOUSE Cysteine and glycine-rich protein 1 OS=Mus musculus GN=Csrp1 PE=1 SV=3	1	102.067	0.00354111	102.07	58.944	102.07					1	102.067	0.00354111	102.07		1	K	GHRPTTNPNASKFAQKIGGSERCPRCSQAVY	X;X;X;X;X;X;X;X;X;X;X;X;X;X;X;Lactic acid;X;X;X;X;X;X;X;X;X;X;X;X;X;X;X	XXXXXXXXXXXXPPPPPPPPPPXXXXXXXXX	FAQK(1)IGGSER	FAQK(102.07)IGGSER	4	2	-0.1556	6413200	6413200	0	0	NaN	0	6413200	NaN	NaN	0	0	0	6413200	0	0	NaN	NaN	NaN
P97315	108	P97315	P97315	Cysteine and glycine-rich protein 1	Csrp1	sp|P97315|CSRP1_MOUSE Cysteine and glycine-rich protein 1 OS=Mus musculus GN=Csrp1 PE=1 SV=3	0.968439	14.8693	0.000404155	57.989	49.057	57.989					0.968439	14.8693	0.000404155	57.989		1	K	EEAPGHRPTTNPNASKFAQKIGGSERCPRCS	X;X;X;X;X;X;X;X;X;X;X;X;X;X;X;Lactic acid;X;X;X;Lactic acid;X;X;X;X;X;X;X;X;X;X;X	PPPPPPPPPPPPPPPPPPPPXXXXXXXXXXX	HEEAPGHRPTTNPNASK(0.968)FAQK(0.032)	HEEAPGHRPTTNPNASK(14.87)FAQK(-14.87)	17	4	0.16607	2940900	2940900	0	0	NaN	0	2940900	NaN	NaN	0	0	0	2940900	0	0	NaN	NaN	NaN
Q6P1J1;P97427	634;520	Q6P1J1	Q6P1J1	Dihydropyrimidinase-related protein 1	Crmp1	tr|Q6P1J1|Q6P1J1_MOUSE Crmp1 protein OS=Mus musculus GN=Crmp1 PE=1 SV=1;sp|P97427|DPYL1_MOUSE Dihydropyrimidinase-related protein 1 OS=Mus musculus GN=Crmp1 PE=1 SV=1	0.999967	44.8408	0.00080225	105.95	93.029	105.95					0.999967	44.8408	0.00080225	105.95		1	K	EVPATPKHAAPAPSAKSSPSKHQPPPIRNLH	X;X;X;X;X;X;X;X;X;X;X;X;X;X;X;Lactic acid;X;X;X;X;Lactic acid;X;X;X;X;X;X;X;X;X;X	XXXXXXXPPPPPPPPPPPPPPXXXXXXXXXX	HAAPAPSAK(1)SSPSK	HAAPAPSAK(44.84)SSPSK(-44.84)	9	3	-0.02586	5480900	5480900	0	0	NaN	0	5480900	NaN	NaN	0	0	0	5480900	0	0	NaN	NaN	NaN
Q6P1J1;P97427	639;525	Q6P1J1	Q6P1J1	Dihydropyrimidinase-related protein 1	Crmp1	tr|Q6P1J1|Q6P1J1_MOUSE Crmp1 protein OS=Mus musculus GN=Crmp1 PE=1 SV=1;sp|P97427|DPYL1_MOUSE Dihydropyrimidinase-related protein 1 OS=Mus musculus GN=Crmp1 PE=1 SV=1	1	76.655	0.00596621	76.655	49.246	76.655	1	76.655	0.00596621	76.655						1	K	PKHAAPAPSAKSSPSKHQPPPIRNLHQSNFS	X;X;X;X;X;X;X;X;X;X;X;X;X;X;X;Lactic acid;X;X;X;X;X;X;X;X;X;X;X;X;X;X;X	XXXXXXXXXXXPPPPPPPPPPPPXXXXXXXX	SSPSK(1)HQPPPIR	SSPSK(76.66)HQPPPIR	5	3	0.68204	2579400	2579400	0	0	NaN	2579400	0	NaN	NaN	2579400	0	0	0	0	0	NaN	NaN	NaN
P97825	64	P97825	P97825	Hematological and neurological expressed 1 protein;Hematological and neurological expressed 1 protein, N-terminally processed	Hn1	sp|P97825|HN1_MOUSE Hematological and neurological expressed 1 protein OS=Mus musculus GN=Hn1 PE=1 SV=3	0.993885	22.1091	1.43779e-12	104.52	99.125	104.52					0.993885	22.1091	1.43779e-12	104.52		1	K	SNIFGTPEENPPSWAKSAGSKSSGGREDSES	X;X;X;X;X;X;X;X;X;X;X;X;X;X;X;Lactic acid;X;X;X;X;Lactic acid;X;X;X;X;X;X;X;X;X;X	PPPPPPPPPPPPPPPPPPPPPXXXXXXXXXX	MASNIFGTPEENPPSWAK(0.994)SAGSK(0.006)	MASNIFGTPEENPPSWAK(22.11)SAGSK(-22.11)	18	3	-0.095311	8266100	8266100	0	0	NaN	0	1189600	NaN	NaN	0	0	0	1189600	0	0	NaN	NaN	NaN
P97825	69	P97825	P97825	Hematological and neurological expressed 1 protein;Hematological and neurological expressed 1 protein, N-terminally processed	Hn1	sp|P97825|HN1_MOUSE Hematological and neurological expressed 1 protein OS=Mus musculus GN=Hn1 PE=1 SV=3	1	51.8194	0.00203658	51.819	42.773	51.819					1	51.8194	0.00203658	51.819		1	K	TPEENPPSWAKSAGSKSSGGREDSESPGTQR	X;X;X;X;X;X;X;X;X;X;X;X;X;X;X;Lactic acid;X;X;X;X;X;X;X;X;X;X;X;X;X;X;X	XXXXXXXXXXXPPPPPPPPPPPPPPPPPPPP	SAGSK(1)SSGGREDSESPGTQR	SAGSK(51.82)SSGGREDSESPGTQR	5	3	0.46698	1254400	1254400	0	0	NaN	0	1254400	NaN	NaN	0	0	0	1254400	0	0	NaN	NaN	NaN
P97825	46	P97825	P97825	Hematological and neurological expressed 1 protein;Hematological and neurological expressed 1 protein, N-terminally processed	Hn1	sp|P97825|HN1_MOUSE Hematological and neurological expressed 1 protein OS=Mus musculus GN=Hn1 PE=1 SV=3	1	154.195	2.56677e-11	154.26	143.72	154.26					1	154.195	2.56677e-11	154.26		1	K	SLGFDEPAEQPVRKNKMASNIFGTPEENPPS	X;X;X;X;X;X;X;X;X;X;X;X;X;X;X;Lactic acid;Oxidation (M);X;X;X;X;X;X;X;X;X;X;X;X;X;X	XXXXXXXXXXXXXXPPPPPPPPPPPPPPPPP	NK(1)MASNIFGTPEENPPSWAK	NK(154.2)MASNIFGTPEENPPSWAK(-154.2)	2	3	-0.16488	10023000	10023000	0	0	NaN	0	1553200	NaN	NaN	0	0	0	1553200	0	0	NaN	NaN	NaN
P97825	148	P97825	P97825	Hematological and neurological expressed 1 protein;Hematological and neurological expressed 1 protein, N-terminally processed	Hn1	sp|P97825|HN1_MOUSE Hematological and neurological expressed 1 protein OS=Mus musculus GN=Hn1 PE=1 SV=3	1	77.6774	0.00841803	88.948	65.519	77.677					1	77.6774	0.00841803	88.948		1	K	VAPAPVPSRRNPPGGKSSLVLG_________	X;X;X;X;X;X;X;X;X;X;X;X;X;X;X;Lactic acid;X;X;X;X;X;X;X;X;X;X;X;X;X;X;X	XXXXXXXXXPPPPPPPPPPPPPXXXXXXXXX	RNPPGGK(1)SSLVLG	RNPPGGK(77.68)SSLVLG	7	2	-0.075377	3970800	3970800	0	0	NaN	0	1178000	NaN	NaN	0	0	0	1178000	0	0	NaN	NaN	NaN
P97825	8	P97825	P97825	Hematological and neurological expressed 1 protein;Hematological and neurological expressed 1 protein, N-terminally processed	Hn1	sp|P97825|HN1_MOUSE Hematological and neurological expressed 1 protein OS=Mus musculus GN=Hn1 PE=1 SV=3	1	67.4565	0.000837529	67.456	51.885	67.456	1	58.6765	0.00167866	58.676	1	67.4565	0.000837529	67.456		1	K	________MTTTTTFKGVDPNSRNSSRVLRP	X;X;X;X;X;X;X;X;X;X;X;X;X;X;X;Lactic acid;X;X;X;X;X;X;X;X;X;X;X;X;X;X;X	XXXXXXXXXPPPPPPPPPPPPPPXXXXXXXX	TTTTTFK(1)GVDPNSR	TTTTTFK(67.46)GVDPNSR	7	2	-0.1126	4754600	4754600	0	0	NaN	1086200	3668300	NaN	NaN	1086200	0	0	3668300	0	0	NaN	NaN	NaN
Q02053	8	Q02053	Q02053	Ubiquitin-like modifier-activating enzyme 1	Uba1	sp|Q02053|UBA1_MOUSE Ubiquitin-like modifier-activating enzyme 1 OS=Mus musculus GN=Uba1 PE=1 SV=1	0.961427	13.9663	0.0117351	53.968	16.322	53.968	0.961427	13.9663	0.0117351	53.968						1	K	________MSSSPLSKKRRVSGPDPKPGSNC	X;X;X;X;X;X;X;X;X;X;X;X;X;X;X;Lactic acid;X;X;X;X;X;X;X;X;X;X;X;X;X;X;X	XXXXXXXXXPPPPPPPPXXXXXXXXXXXXXX	SSSPLSK(0.961)K(0.039)	SSSPLSK(13.97)K(-13.97)	7	2	-0.25087	777260	777260	0	0	NaN	777260	0	NaN	NaN	777260	0	0	0	0	0	NaN	NaN	NaN
Q02053	9	Q02053	Q02053	Ubiquitin-like modifier-activating enzyme 1	Uba1	sp|Q02053|UBA1_MOUSE Ubiquitin-like modifier-activating enzyme 1 OS=Mus musculus GN=Uba1 PE=1 SV=1	0.556377	0.983553	0.00432145	72.485	26.059	72.485					0.556377	0.983553	0.00432145	72.485		1	K	_______MSSSPLSKKRRVSGPDPKPGSNCS	X;X;X;X;X;X;X;X;X;X;X;X;X;X;X;Lactic acid;X;X;X;X;X;X;X;X;X;X;X;X;X;X;X	XXXXXXXXPPPPPPPPXXXXXXXXXXXXXXX	SSSPLSK(0.444)K(0.556)	SSSPLSK(-0.98)K(0.98)	8	2	-0.042499	4228800	4228800	0	0	NaN	0	4228800	NaN	NaN	0	0	0	4228800	0	0	NaN	NaN	NaN
Q2MHE5	66	Q2MHE5	Q2MHE5	Docking protein 6	Dok6	sp|Q2MHE5|DOK6_MOUSE Docking protein 6 OS=Mus musculus GN=Dok6 PE=2 SV=1	1	56.0107	0.0308037	56.011	20.131	56.011	1	56.0107	0.0308037	56.011							K	AYFRNFHKVTELHNIKNITRLPRETKKHAVA	X;X;X;X;X;X;X;X;X;X;X;X;X;X;X;Lactic acid;X;X;X;X;X;X;X;X;X;X;X;X;X;X;X	XXXXXXXXPPPPPPPPXXXXXXXXXXXXXXX	VTELHNIK(1)	VTELHNIK(56.01)	8	2	2.8887	1894300	1894300	0	0	NaN	1894300	0	NaN	NaN	1894300	0	0	0	0	0	NaN	NaN	NaN
Q3U2G2;Q61316	571;571	Q3U2G2	Q3U2G2	Heat shock 70 kDa protein 4	Hspa4	tr|Q3U2G2|Q3U2G2_MOUSE Heat shock 70 kDa protein 4 OS=Mus musculus GN=Hspa4 PE=1 SV=1;sp|Q61316|HSP74_MOUSE Heat shock 70 kDa protein 4 OS=Mus musculus GN=Hspa4 PE=1 SV=1	0.568681	1.2007	0.0204734	44.447	32.091	44.447					0.568681	1.2007	0.0204734	44.447		1	K	AGSKDKKTDQPPQAKKAKVKTSTVDLPIESQ	X;X;X;X;X;X;X;X;X;X;X;X;X;X;X;Lactic acid;X;X;X;X;X;X;X;X;X;X;X;X;X;X;X	XXXXXXXPPPPPPPPPXXXXXXXXXXXXXXX	TDQPPQAK(0.431)K(0.569)	TDQPPQAK(-1.2)K(1.2)	9	2	-0.30126	0	0	0	0	NaN	0	0	NaN	NaN	0	0	0	0	0	0	NaN	NaN	NaN
Q3UCQ1	214	Q3UCQ1	Q3UCQ1	Forkhead box protein K2	Foxk2	sp|Q3UCQ1|FOXK2_MOUSE Forkhead box protein K2 OS=Mus musculus GN=Foxk2 PE=1 SV=3	1	75.3782	0.000993021	75.378	58.602	75.378					1	75.3782	0.000993021	75.378		1	K	NSCPSSPRGAGSSGYKVGRVMPSDLSLMADN	X;X;X;X;X;X;X;X;X;X;X;X;X;X;X;Lactic acid;X;X;X;X;X;X;X;X;X;X;X;X;X;X;X	XXXXXXXXPPPPPPPPPPPXXXXXXXXXXXX	GAGSSGYK(1)VGR	GAGSSGYK(75.38)VGR	8	2	0.39924	0	0	0	0	NaN	0	0	NaN	NaN	0	0	0	0	0	0	NaN	NaN	NaN
Q3UH70;Q9ESU6	1054;1053	Q3UH70	Q3UH70	Bromodomain-containing protein 4	Brd4	tr|Q3UH70|Q3UH70_MOUSE Bromodomain-containing protein 4 OS=Mus musculus GN=Brd4 PE=1 SV=1;sp|Q9ESU6|BRD4_MOUSE Bromodomain-containing protein 4 OS=Mus musculus GN=Brd4 PE=1 SV=2	1	80.3118	0.000557979	80.312	74.036	80.312					1	80.3118	0.000557979	80.312		1	K	KPQQVIQHHPSPRHHKSDPYSAGHLREAPSP	X;X;X;X;X;X;X;X;X;X;X;X;X;X;X;Lactic acid;X;X;X;X;X;X;X;X;X;X;X;X;X;X;X	XXXXXXXXXXXXXPPPPPPPPPPPPPXXXXX	HHK(1)SDPYSAGHLR	HHK(80.31)SDPYSAGHLR	3	4	-0.19695	3083400	3083400	0	0	NaN	0	3083400	NaN	NaN	0	0	0	3083400	0	0	NaN	NaN	NaN
Q3UH70;Q9ESU6;B0V2V6;B0V2V8	319;318;318;318	Q3UH70	Q3UH70	Bromodomain-containing protein 4	Brd4	tr|Q3UH70|Q3UH70_MOUSE Bromodomain-containing protein 4 OS=Mus musculus GN=Brd4 PE=1 SV=1;sp|Q9ESU6|BRD4_MOUSE Bromodomain-containing protein 4 OS=Mus musculus GN=Brd4 PE=1 SV=2;tr|B0V2V6|B0V2V6_MOUSE Bromodomain-containing protein 4 (Fragment) OS=Mus musc	1	94.1632	0.000848331	99.384	63.89	94.163					1	94.1632	0.000848331	99.384		1	K	PIHEPPSLAPEPKTAKLGPRRESSRPVKPPK	X;X;X;X;X;X;X;X;X;X;X;X;X;X;X;Lactic acid;X;X;X;X;X;X;X;X;X;X;X;X;X;X;X	XXXXXXXXXXXXXPPPPPPPXXXXXXXXXXX	TAK(1)LGPR	TAK(94.16)LGPR	3	2	-0.29862	0	0	0	0	NaN	0	0	NaN	NaN	0	0	0	0	0	0	NaN	NaN	NaN
Q3UID0;Q6PDG5	326;326	Q3UID0	Q3UID0	SWI/SNF complex subunit SMARCC2	Smarcc2	tr|Q3UID0|Q3UID0_MOUSE SWI/SNF complex subunit SMARCC2 OS=Mus musculus GN=Smarcc2 PE=1 SV=1;sp|Q6PDG5|SMRC2_MOUSE SWI/SNF complex subunit SMARCC2 OS=Mus musculus GN=Smarcc2 PE=1 SV=2	0.998323	27.7477	0.00702929	90.05	48.174	90.05					0.998323	27.7477	0.00702929	90.05		1	K	AKKKNAKKGPSTPYTKSKRGHREEEQEDLTK	X;X;X;X;X;X;X;X;X;X;X;X;X;X;X;Lactic acid;X;X;X;X;X;X;X;X;X;X;X;X;X;X;X	XXXXXXXPPPPPPPPPPPXXXXXXXXXXXXX	KGPSTPYTK(0.998)SK(0.002)	K(-62.75)GPSTPYTK(27.75)SK(-27.75)	9	2	0.010269	6979100	6979100	0	0	NaN	0	4558500	NaN	NaN	0	0	0	4558500	0	0	NaN	NaN	NaN
Q3UMP4;Q9CY58;A0A0N4SV32;A0A0N4SWH2;A0A0N4SUQ1;A0A0N4SUN8;A0A0N4SV40;A0A0N4SVK5	102;102;102;102;102;102;49;25	Q3UMP4	Q3UMP4	Plasminogen activator inhibitor 1 RNA-binding protein	Serbp1	tr|Q3UMP4|Q3UMP4_MOUSE Plasminogen activator inhibitor 1 RNA-binding protein OS=Mus musculus GN=Serbp1 PE=1 SV=1;sp|Q9CY58|PAIRB_MOUSE Plasminogen activator inhibitor 1 RNA-binding protein OS=Mus musculus GN=Serbp1 PE=1 SV=2;tr|A0A0N4SV32|A0A0N4SV32_MOUSE	0.607345	1.89425	0.0198838	47.574	12.217	47.574					0.607345	1.89425	0.0198838	47.574			K	GVADKKEETQPPVALKKEGIRRVGRRPDQQL	X;X;X;X;X;X;X;X;X;X;X;X;X;X;X;Lactic acid;X;X;X;X;X;X;X;X;X;X;X;X;X;X;X	XXXXXXPPPPPPPPPPPXXXXXXXXXXXXXX	EETQPPVALK(0.607)K(0.393)	EETQPPVALK(1.89)K(-1.89)	10	2	0.62107	1419600	1419600	0	0	NaN	0	1419600	NaN	NaN	0	0	0	1419600	0	0	NaN	NaN	NaN
Q569Z6;Q8BZN7	346;346	Q569Z6	Q569Z6	Thyroid hormone receptor-associated protein 3	Thrap3	sp|Q569Z6|TR150_MOUSE Thyroid hormone receptor-associated protein 3 OS=Mus musculus GN=Thrap3 PE=1 SV=1;tr|Q8BZN7|Q8BZN7_MOUSE Thyroid hormone receptor-associated protein 3 OS=Mus musculus GN=Thrap3 PE=1 SV=1	1	122.699	0.000873754	122.7	104.84	122.7					1	122.699	0.000873754	122.7		1	K	SQKEESAASGGAAYSKRYLEEQKTENGKDKE	X;X;X;X;X;X;X;X;X;X;X;X;X;X;X;Lactic acid;X;X;X;X;X;X;X;X;X;X;X;X;X;X;X	XXXPPPPPPPPPPPPPPXXXXXXXXXXXXXX	EESAASGGAAYSK(1)R	EESAASGGAAYSK(122.7)R	13	2	-0.42857	1343400	1343400	0	0	NaN	0	1343400	NaN	NaN	0	0	0	1343400	0	0	NaN	NaN	NaN
Q569Z6;Q8BZN7	459;459	Q569Z6	Q569Z6	Thyroid hormone receptor-associated protein 3	Thrap3	sp|Q569Z6|TR150_MOUSE Thyroid hormone receptor-associated protein 3 OS=Mus musculus GN=Thrap3 PE=1 SV=1;tr|Q8BZN7|Q8BZN7_MOUSE Thyroid hormone receptor-associated protein 3 OS=Mus musculus GN=Thrap3 PE=1 SV=1	0.999143	30.668	0.00175616	96.015	56.306	96.015					0.999143	30.668	0.00175616	96.015		1	K	DDEPKFMSKVIAGASKNQEEEKSGKWESLHT	X;X;X;X;X;X;X;X;X;X;X;X;X;X;X;Lactic acid;X;X;X;X;X;X;X;X;X;X;X;X;X;X;X	XXXXXXXXXPPPPPPPPPPPPPXXXXXXXXX	VIAGASK(0.999)NQEEEK(0.001)	VIAGASK(30.67)NQEEEK(-30.67)	7	2	-0.10167	790480	790480	0	0	NaN	0	790480	NaN	NaN	0	0	0	790480	0	0	NaN	NaN	NaN
Q569Z6;Q8BZN7	524;524	Q569Z6	Q569Z6	Thyroid hormone receptor-associated protein 3	Thrap3	sp|Q569Z6|TR150_MOUSE Thyroid hormone receptor-associated protein 3 OS=Mus musculus GN=Thrap3 PE=1 SV=1;tr|Q8BZN7|Q8BZN7_MOUSE Thyroid hormone receptor-associated protein 3 OS=Mus musculus GN=Thrap3 PE=1 SV=1	0.963001	14.1543	0.0114664	85.377	33.382	85.377					0.963001	14.1543	0.0114664	85.377		1	K	HRGFVPEKNFRVTAYKAVQEKSSSPPPRKTS	X;X;X;X;X;X;X;X;X;X;X;X;X;X;X;Lactic acid;X;X;X;X;X;X;X;X;X;X;X;X;X;X;X	XXXXXXXXXXXPPPPPPPPPPXXXXXXXXXX	VTAYK(0.963)AVQEK(0.037)	VTAYK(14.15)AVQEK(-14.15)	5	2	-0.15041	931380	931380	0	0	NaN	0	931380	NaN	NaN	0	0	0	931380	0	0	NaN	NaN	NaN
Q9DAY9;Q5SQB5;Q61937;Q5SQB0;E9Q5T3	150;150;150;150;138	Q9DAY9	Q9DAY9	Nucleophosmin	Npm1;Gm5611	tr|Q9DAY9|Q9DAY9_MOUSE Nucleophosmin OS=Mus musculus GN=Npm1 PE=1 SV=1;tr|Q5SQB5|Q5SQB5_MOUSE Nucleophosmin OS=Mus musculus GN=Npm1 PE=1 SV=1;sp|Q61937|NPM_MOUSE Nucleophosmin OS=Mus musculus GN=Npm1 PE=1 SV=1;tr|Q5SQB0|Q5SQB0_MOUSE Nucleophosmin OS=Mus mu	0.999896	39.8161	0.00907375	87.639	60.31	87.639	0.999442	32.5277	0.0291598	72.879	0.999896	39.8161	0.00907375	87.639		1	K	LLGMSGKRSAPGGGNKVPQKKVKLDEDDEDD	X;X;X;X;X;X;X;X;X;X;X;X;X;X;X;Lactic acid;X;X;X;X;X;X;X;X;X;X;X;X;X;X;X	XXXXXXXXPPPPPPPPPPPPXXXXXXXXXXX	SAPGGGNK(1)VPQK	SAPGGGNK(39.82)VPQK(-39.82)	8	2	-0.30241	8453700	8453700	0	0	NaN	1953000	6500800	NaN	NaN	1953000	0	0	6500800	0	0	NaN	NaN	NaN
Q9DAY9;Q5SQB5;Q61937;E9Q5T3	211;211;211;191	Q9DAY9	Q9DAY9	Nucleophosmin	Npm1;Gm5611	tr|Q9DAY9|Q9DAY9_MOUSE Nucleophosmin OS=Mus musculus GN=Npm1 PE=1 SV=1;tr|Q5SQB5|Q5SQB5_MOUSE Nucleophosmin OS=Mus musculus GN=Npm1 PE=1 SV=1;sp|Q61937|NPM_MOUSE Nucleophosmin OS=Mus musculus GN=Npm1 PE=1 SV=1;tr|E9Q5T3|E9Q5T3_MOUSE Protein Gm5611 OS=Mus m	0.999793	36.8498	0.00101154	92.063	70.432	92.063	0.997043	25.2781	0.0174015	54.09	0.999793	36.8498	0.00101154	92.063		1	K	RDTPAKNAQKSNQNGKDLKPSTPRSKGQESF	X;X;X;X;X;X;X;X;X;X;X;X;X;X;X;Lactic acid;X;X;X;X;X;X;X;X;X;X;X;X;X;X;X	XXXXXXXXXXPPPPPPPPPPPPPPXXXXXXX	SNQNGK(1)DLKPSTPR	SNQNGK(36.85)DLK(-36.85)PSTPR	6	3	0.62204	3920700	3920700	0	0	NaN	1633700	2287000	NaN	NaN	1633700	0	0	2287000	0	0	NaN	NaN	NaN
Q5U458	476	Q5U458	Q5U458	DnaJ homolog subfamily C member 11	Dnajc11	sp|Q5U458|DJC11_MOUSE DnaJ homolog subfamily C member 11 OS=Mus musculus GN=Dnajc11 PE=1 SV=2	1	79.5969	0.00739562	79.597	24.202	79.597					1	79.5969	0.00739562	79.597		1	K	GLIIVNAWYGKFVNDKSRKNEKVKVIDVTVP	X;X;X;X;X;X;X;X;X;X;X;X;X;X;X;Lactic acid;X;X;X;X;X;X;X;X;X;X;X;X;X;X;X	XXXXXXXXXXXPPPPPPPXXXXXXXXXXXXX	FVNDK(1)SR	FVNDK(79.6)SR	5	2	0.88076	0	0	0	0	NaN	0	0	NaN	NaN	0	0	0	0	0	0	NaN	NaN	NaN
Q60520	553	Q60520	Q60520	Paired amphipathic helix protein Sin3a	Sin3a	sp|Q60520|SIN3A_MOUSE Paired amphipathic helix protein Sin3a OS=Mus musculus GN=Sin3a PE=1 SV=3	1	41.4293	0.027223	41.429	17.274	41.429					1	41.4293	0.027223	41.429		1	K	RATEGIAMEIDYASCKRLGSSYRALPKSYQQ	X;X;X;X;X;X;X;X;X;X;X;X;X;X;X;Lactic acid;X;X;X;X;X;X;X;X;X;X;X;X;X;X;X	XXXXXXXXXPPPPPPPPXXXXXXXXXXXXXX	IDYASCK(1)R	IDYASCK(41.43)R	7	2	0.25549	0	0	0	0	NaN	0	0	NaN	NaN	0	0	0	0	0	0	NaN	NaN	NaN
Q60520	570	Q60520	Q60520	Paired amphipathic helix protein Sin3a	Sin3a	sp|Q60520|SIN3A_MOUSE Paired amphipathic helix protein Sin3a OS=Mus musculus GN=Sin3a PE=1 SV=3	1	80.2387	0.0195415	80.239	58.091	80.239					1	80.2387	0.0195415	80.239		1	K	LGSSYRALPKSYQQPKCTGRTPLCKEVLNDT	X;X;X;X;X;X;X;X;X;X;X;X;X;X;X;Lactic acid;X;X;X;X;X;X;X;X;X;X;X;X;X;X;X	XXXXXXXXXXPPPPPPPPPPXXXXXXXXXXX	SYQQPK(1)CTGR	SYQQPK(80.24)CTGR	6	2	0.34517	565120	565120	0	0	NaN	0	565120	NaN	NaN	0	0	0	565120	0	0	NaN	NaN	NaN
Q921L6;Q60598	87;87	Q921L6	Q921L6	Src substrate cortactin	Cttn	tr|Q921L6|Q921L6_MOUSE Cortactin, isoform CRA_a OS=Mus musculus GN=Cttn PE=1 SV=1;sp|Q60598|SRC8_MOUSE Src substrate cortactin OS=Mus musculus GN=Cttn PE=1 SV=2	1	48.3913	0.0218905	48.391	37.121	48.391					1	48.3913	0.0218905	48.391		1	K	KELETGPKASHGYGGKFGVEQDRMDRSAVGH	X;X;X;X;X;X;X;X;X;X;X;X;X;X;X;Lactic acid;X;X;X;X;X;X;X;X;X;X;X;X;X;X;X	XXXXXXXXPPPPPPPPPPPPPPPXXXXXXXX	ASHGYGGK(1)FGVEQDR	ASHGYGGK(48.39)FGVEQDR	8	3	-0.5526	1588500	1588500	0	0	NaN	0	1588500	NaN	NaN	0	0	0	1588500	0	0	NaN	NaN	NaN
Q921L6;Q60598	272;309	Q921L6	Q921L6	Src substrate cortactin	Cttn	tr|Q921L6|Q921L6_MOUSE Cortactin, isoform CRA_a OS=Mus musculus GN=Cttn PE=1 SV=1;sp|Q60598|SRC8_MOUSE Src substrate cortactin OS=Mus musculus GN=Cttn PE=1 SV=2	0.999977	46.311	0.0188446	81.119	49.164	81.119					0.999977	46.311	0.0188446	81.119		1	K	QLHESQKDYAKGFGGKYGVQKDRMDKNASTF	X;X;X;X;X;X;X;X;X;X;X;X;X;X;X;Lactic acid;X;X;X;X;Lactic acid;X;X;X;X;X;X;X;X;X;X	XXXXXXXXXXXPPPPPPPPPPXXXXXXXXXX	GFGGK(1)YGVQK	GFGGK(46.31)YGVQK(-46.31)	5	2	0.16929	1418600	1418600	0	0	NaN	0	1418600	NaN	NaN	0	0	0	1418600	0	0	NaN	NaN	NaN
Q921L6;Q60598	277;314	Q921L6	Q921L6	Src substrate cortactin	Cttn	tr|Q921L6|Q921L6_MOUSE Cortactin, isoform CRA_a OS=Mus musculus GN=Cttn PE=1 SV=1;sp|Q60598|SRC8_MOUSE Src substrate cortactin OS=Mus musculus GN=Cttn PE=1 SV=2	1	68.9149	0.0240793	68.915	25.915	68.915					1	68.9149	0.0240793	68.915			K	QKDYAKGFGGKYGVQKDRMDKNASTFEEVVQ	X;X;X;X;X;X;X;X;X;X;X;X;X;X;X;Lactic acid;X;X;X;X;X;X;X;X;X;X;X;X;X;X;X	XXXXXXXXXXXPPPPPPPXXXXXXXXXXXXX	YGVQK(1)DR	YGVQK(68.91)DR	5	2	-0.00013724	1022300	1022300	0	0	NaN	0	1022300	NaN	NaN	0	0	0	1022300	0	0	NaN	NaN	NaN
Q61029	212	Q61029	Q61029	Lamina-associated polypeptide 2, isoforms beta/delta/epsilon/gamma	Tmpo	sp|Q61029|LAP2B_MOUSE Lamina-associated polypeptide 2, isoforms beta/delta/epsilon/gamma OS=Mus musculus GN=Tmpo PE=1 SV=4	1	124.834	0.0122573	124.83	59.582	124.83					1	124.834	0.0122573	124.83		1	K	KREPLKGRAKTPVTLKQRRTEHNQSYSQAGV	X;X;X;X;X;X;X;X;X;X;X;X;X;X;X;Lactic acid;X;X;X;X;X;X;X;X;X;X;X;X;X;X;X	XXXXXXXXXXPPPPPPPPXXXXXXXXXXXXX	TPVTLK(1)QR	TPVTLK(124.83)QR	6	2	-0.067109	1778200	1778200	0	0	NaN	0	1778200	NaN	NaN	0	0	0	1778200	0	0	NaN	NaN	NaN
Q61142	7	Q61142	Q61142	Spindlin-1	Spin1	sp|Q61142|SPIN1_MOUSE Spindlin-1 OS=Mus musculus GN=Spin1 PE=1 SV=2	1	133.134	0.00162719	133.13	108.21	133.13					1	133.134	0.00162719	133.13		1	K	_________MKTPFGKTPGQRSRADAGHAGV	X;X;X;X;X;X;X;X;X;X;X;X;X;X;X;Lactic acid;X;X;X;X;X;X;X;X;X;X;X;X;X;X;X	XXXXXXXXXXXPPPPPPPPPPXXXXXXXXXX	TPFGK(1)TPGQR	TPFGK(133.13)TPGQR	5	2	0.90331	5255500	5255500	0	0	NaN	0	5255500	NaN	NaN	0	0	0	5255500	0	0	NaN	NaN	NaN
Q8BTS0;Q61656;S4R1I6;B1ARC0;B1ARB9;S4R1E3	32;32;32;32;32;32	Q8BTS0	Q8BTS0	Probable ATP-dependent RNA helicase DDX5	Ddx5	tr|Q8BTS0|Q8BTS0_MOUSE DEAD (Asp-Glu-Ala-Asp) box polypeptide 5 OS=Mus musculus GN=Ddx5 PE=1 SV=1;sp|Q61656|DDX5_MOUSE Probable ATP-dependent RNA helicase DDX5 OS=Mus musculus GN=Ddx5 PE=1 SV=2;tr|S4R1I6|S4R1I6_MOUSE MCG2872, isoform CRA_b OS=Mus musculus	0.872548	8.35441	0.0295329	67.169	30.341	67.169					0.872548	8.35441	0.0295329	67.169		1	K	GAPRFGGSRTGPLSGKKFGNPGEKLVKKKWN	X;X;X;X;X;X;X;X;X;X;X;X;X;X;X;Lactic acid;X;X;X;X;X;X;X;X;X;X;X;X;X;X;X	XXXXXXXXXPPPPPPPPXXXXXXXXXXXXXX	TGPLSGK(0.873)K(0.127)	TGPLSGK(8.35)K(-8.35)	7	2	1.5739	5599500	5599500	0	0	NaN	0	5599500	NaN	NaN	0	0	0	5599500	0	0	NaN	NaN	NaN
Q61686	102	Q61686	Q61686	Chromobox protein homolog 5	Cbx5	sp|Q61686|CBX5_MOUSE Chromobox protein homolog 5 OS=Mus musculus GN=Cbx5 PE=1 SV=1	0.794738	5.87915	0.00353705	97.734	68.067	97.734					0.794738	5.87915	0.00353705	97.734		1	K	GNKRKSSFSNSADDIKSKKKREQSNDIARGF	X;X;X;X;X;X;X;X;X;X;X;X;X;X;X;Lactic acid;X;X;X;X;X;X;X;X;X;X;X;X;X;X;X	XXXXXPPPPPPPPPPPPPXXXXXXXXXXXXX	SSFSNSADDIK(0.795)SK(0.205)	SSFSNSADDIK(5.88)SK(-5.88)	11	2	-0.20443	1220700	1220700	0	0	NaN	0	1220700	NaN	NaN	0	0	0	1220700	0	0	NaN	NaN	NaN
Q61990	115	Q61990	Q61990	Poly(rC)-binding protein 2	Pcbp2	sp|Q61990|PCBP2_MOUSE Poly(rC)-binding protein 2 OS=Mus musculus GN=Pcbp2 PE=1 SV=1	0.914117	10.2709	7.47699e-05	81.317	61.739	76.533					0.914117	10.2709	7.47699e-05	81.317		1	K	LRLVVPASQCGSLIGKGGCKIKEIRESTGAQ	X;X;X;X;X;X;X;X;X;X;X;X;X;X;X;Lactic acid;X;X;X;X;X;X;X;X;X;X;X;X;X;X;X	XXPPPPPPPPPPPPPPPPPPXXXXXXXXXXX	LVVPASQCGSLIGK(0.914)GGCK(0.086)	LVVPASQCGSLIGK(10.27)GGCK(-10.27)	14	2	0.99259	4778300	4778300	0	0	NaN	0	3684200	NaN	NaN	0	0	0	3684200	0	0	NaN	NaN	NaN
Q62141	397	Q62141	Q62141	Paired amphipathic helix protein Sin3b	Sin3b	sp|Q62141|SIN3B_MOUSE Paired amphipathic helix protein Sin3b OS=Mus musculus GN=Sin3b PE=1 SV=2	0.999944	42.4964	0.0161861	84.476	42.496	84.476					0.999944	42.4964	0.0161861	84.476		1	K	YASCKRIGSSYRALPKTYQQPKCSGRTAICK	X;X;X;X;Lactic acid;X;X;X;X;X;X;X;X;X;X;Lactic acid;X;X;X;X;X;Lactic acid;X;X;X;X;X;X;X;X;X	XXXXXXXXXXXXPPPPPPPPPPXXXXXXXXX	ALPK(1)TYQQPK	ALPK(42.5)TYQQPK(-42.5)	4	2	-3.3813	1656300	1656300	0	0	NaN	0	1656300	NaN	NaN	0	0	0	1656300	0	0	NaN	NaN	NaN
Q62141	403	Q62141	Q62141	Paired amphipathic helix protein Sin3b	Sin3b	sp|Q62141|SIN3B_MOUSE Paired amphipathic helix protein Sin3b OS=Mus musculus GN=Sin3b PE=1 SV=2	1	109.714	0.00397291	109.71	78.425	109.71					1	109.714	0.00397291	109.71		1	K	IGSSYRALPKTYQQPKCSGRTAICKEVLNDT	X;X;X;X;X;X;X;X;X;X;X;X;X;X;X;Lactic acid;X;X;X;X;X;X;X;X;X;X;X;X;X;X;X	XXXXXXXXXXPPPPPPPPPPXXXXXXXXXXX	TYQQPK(1)CSGR	TYQQPK(109.71)CSGR	6	2	-1.2144	816440	816440	0	0	NaN	0	816440	NaN	NaN	0	0	0	816440	0	0	NaN	NaN	NaN
Q62141	386	Q62141	Q62141	Paired amphipathic helix protein Sin3b	Sin3b	sp|Q62141|SIN3B_MOUSE Paired amphipathic helix protein Sin3b OS=Mus musculus GN=Sin3b PE=1 SV=2	1	41.4293	0.0207726	81.548	57.393	41.429					1	41.4293	0.0207726	81.548		1	K	RSGDGISREIDYASCKRIGSSYRALPKTYQQ	X;X;X;X;X;X;X;X;X;X;X;X;X;X;X;Lactic acid;X;X;X;X;X;X;X;X;X;X;Lactic acid;X;X;X;X	XXXXXXXXPPPPPPPPPXXXXXXXXXXXXXX	IDYASCK(1)R	IDYASCK(41.43)R	7	2	0.25549	1153300	1153300	0	0	NaN	0	1153300	NaN	NaN	0	0	0	1153300	0	0	NaN	NaN	NaN
Q62318	435	Q62318	Q62318	Transcription intermediary factor 1-beta	Trim28	sp|Q62318|TIF1B_MOUSE Transcription intermediary factor 1-beta OS=Mus musculus GN=Trim28 PE=1 SV=3	1	74.9873	0.000404051	74.987	56.363	74.987					1	74.9873	0.000404051	74.987		1	K	GPGPMAPPRAPGPLSKQGSGSSQPMEVQEGY	X;X;X;X;X;X;X;X;X;X;X;X;X;X;X;Lactic acid;X;X;X;X;X;X;X;X;X;X;X;X;X;X;X	XXXXXXXXXPPPPPPPPPPPPPPPPPPPPXX	APGPLSK(1)QGSGSSQPMEVQE	APGPLSK(74.99)QGSGSSQPMEVQE	7	2	-0.40616	1232100	1232100	0	0	NaN	0	1232100	NaN	NaN	0	0	0	1232100	0	0	NaN	NaN	NaN
Q62318	469	Q62318	Q62318	Transcription intermediary factor 1-beta	Trim28	sp|Q62318|TIF1B_MOUSE Transcription intermediary factor 1-beta OS=Mus musculus GN=Trim28 PE=1 SV=3	1	81.9667	3.01321e-07	81.967	77.44	81.967					1	81.9667	3.01321e-07	81.967		1	K	SDDPYSSAEPHVSGMKRSRSGEGEVSGLLRK	X;X;X;X;X;X;X;X;X;X;X;X;X;X;X;Lactic acid;X;X;X;X;X;X;X;X;X;X;X;X;X;X;X	PPPPPPPPPPPPPPPPPXXXXXXXXXXXXXX	GYGFGSDDPYSSAEPHVSGMK(1)R	GYGFGSDDPYSSAEPHVSGMK(81.97)R	21	3	-0.34004	6333800	6333800	0	0	NaN	0	6333800	NaN	NaN	0	0	0	6333800	0	0	NaN	NaN	NaN
Q64475	6	Q64475	Q64475	Histone H2B type 1-B	Hist1h2bb	sp|Q64475|H2B1B_MOUSE Histone H2B type 1-B OS=Mus musculus GN=Hist1h2bb PE=1 SV=3	1	76.4768	0.00196196	115.78	69.319	115.78	0.999995	52.917	0.00700265	90.108	1	76.4768	0.00196196	115.78		1	K	__________MPEPSKSAPAPKKGSKKAISK	X;X;X;X;X;X;X;X;X;X;X;X;X;X;X;Lactic acid;X;X;X;X;X;X;X;X;X;X;X;X;X;X;X	XXXXXXXXXXXPPPPPPPPPPPXXXXXXXXX	PEPSK(1)SAPAPK	PEPSK(76.48)SAPAPK(-76.48)	5	2	0.19675	69618000	69618000	0	0	NaN	13676000	53165000	NaN	NaN	13676000	0	0	53165000	0	0	NaN	NaN	NaN
Q64511	1202	Q64511	Q64511	DNA topoisomerase 2-beta	Top2b	sp|Q64511|TOP2B_MOUSE DNA topoisomerase 2-beta OS=Mus musculus GN=Top2b PE=1 SV=2	0.985286	18.2582	0.00223166	114.4	75.097	114.4					0.985286	18.2582	0.00223166	114.4		1	K	VEAQEREDILAGMSGKAIKGKVGKPKVKKLQ	X;X;X;X;X;X;X;X;X;X;X;X;X;X;X;Lactic acid;X;X;X;X;X;X;X;X;X;X;X;X;X;X;X	XXXXXXPPPPPPPPPPPPPXXXXXXXXXXXX	EDILAGMSGK(0.985)AIK(0.015)	EDILAGMSGK(18.26)AIK(-18.26)	10	2	-1.1963	2720100	2720100	0	0	NaN	0	2720100	NaN	NaN	0	0	0	2720100	0	0	NaN	NaN	NaN
Q64511	1477	Q64511	Q64511	DNA topoisomerase 2-beta	Top2b	sp|Q64511|TOP2B_MOUSE DNA topoisomerase 2-beta OS=Mus musculus GN=Top2b PE=1 SV=2	0.999999	62.695	0.0118057	96.492	53.368	96.492					0.999999	62.695	0.0118057	96.492		1	K	FAPSFGLKQTDKLPSKTVAAKKGKPPSDTAP	X;X;X;X;X;X;X;X;X;X;X;X;X;X;X;Lactic acid;X;X;X;X;X;X;X;X;X;X;X;X;X;X;X	XXXXXXXXXXXXPPPPPPPPPXXXXXXXXXX	LPSK(1)TVAAK	LPSK(62.7)TVAAK(-62.7)	4	2	-0.23723	6360500	6360500	0	0	NaN	0	6360500	NaN	NaN	0	0	0	6360500	0	0	NaN	NaN	NaN
Q64525	6	Q64525	Q64525	Histone H2B type 2-B	Hist2h2bb	sp|Q64525|H2B2B_MOUSE Histone H2B type 2-B OS=Mus musculus GN=Hist2h2bb PE=1 SV=3	0.999999	60.1779	0.00419509	99.568	57.965	97.734	0.999995	53.4099	0.00419509	99.568	0.999999	60.1779	0.00471607	97.734		1	K	__________MPDPAKSAPAPKKGSKKAVTK	X;X;X;X;X;X;X;X;X;X;X;X;X;X;X;Lactic acid;X;X;X;X;X;X;X;X;X;X;X;X;X;X;X	XXXXXXXXXXXPPPPPPPPPPPXXXXXXXXX	PDPAK(1)SAPAPK	PDPAK(60.18)SAPAPK(-60.18)	5	2	0.20635	76563000	76563000	0	0	NaN	24342000	52221000	NaN	NaN	24342000	0	0	52221000	0	0	NaN	NaN	NaN
Q69ZX6	711	Q69ZX6	Q69ZX6	MORC family CW-type zinc finger protein 2A	Morc2a	sp|Q69ZX6|MOR2A_MOUSE MORC family CW-type zinc finger protein 2A OS=Mus musculus GN=Morc2a PE=1 SV=2	0.990501	20.1815	0.0271097	77.741	43.944	77.741					0.990501	20.1815	0.0271097	77.741		1	K	SLIPSSKSLREVPAQKAIKTPVVKKPEPPVK	X;X;X;X;X;X;X;X;X;X;X;X;X;X;X;Lactic acid;X;X;X;X;X;X;X;X;X;X;X;X;X;X;X	XXXXXXXXXXPPPPPPPPPXXXXXXXXXXXX	EVPAQK(0.991)AIK(0.009)	EVPAQK(20.18)AIK(-20.18)	6	2	-0.15578	1552500	1552500	0	0	NaN	0	1552500	NaN	NaN	0	0	0	1552500	0	0	NaN	NaN	NaN
Q6A068	294	Q6A068	Q6A068	Cell division cycle 5-like protein	Cdc5l	sp|Q6A068|CDC5L_MOUSE Cell division cycle 5-like protein OS=Mus musculus GN=Cdc5l PE=1 SV=2	1	81.5247	0.00809556	81.525	32.157	81.525					1	81.5247	0.00809556	81.525		1	K	ILQTSGVSEFTKKRSKLVLPAPQISDAELQE	X;X;X;X;X;X;X;X;X;X;X;X;X;X;X;Lactic acid;X;X;X;X;X;X;X;X;X;X;X;X;X;X;X	XXXXXXXXXXXXXXPPPPPPPPPPPPPPXXX	SK(1)LVLPAPQISDAE	SK(81.52)LVLPAPQISDAE	2	2	-0.027948	1684700	1684700	0	0	NaN	0	1684700	NaN	NaN	0	0	0	1684700	0	0	NaN	NaN	NaN
Q6ZWY8;A0A0N4SVF0	15;15	Q6ZWY8	Q6ZWY8	Thymosin beta-10	Tmsb10	sp|Q6ZWY8|TYB10_MOUSE Thymosin beta-10 OS=Mus musculus GN=Tmsb10 PE=1 SV=3;tr|A0A0N4SVF0|A0A0N4SVF0_MOUSE Thymosin beta-10 OS=Mus musculus GN=Tmsb10 PE=1 SV=1	0.983973	17.8814	0.000529723	125.53	108.58	125.53	0.983973	17.8814	0.000529723	125.53						1	K	_MADKPDMGEIASFDKAKLKKTETQEKNTLP	X;X;X;X;X;X;X;X;X;X;X;X;X;X;X;Lactic acid;X;X;X;X;X;X;X;X;X;X;Lactic acid;X;X;X;X	XXPPPPPPPPPPPPPPPPXXXXXXXXXXXXX	ADKPDMGEIASFDK(0.984)AK(0.016)	ADK(-121.19)PDMGEIASFDK(17.88)AK(-17.88)	14	2	0.054835	3646100	3646100	0	0	NaN	3646100	0	NaN	NaN	3646100	0	0	0	0	0	NaN	NaN	NaN
Q6ZWY8;A0A0N4SVF0;CON__P21752	26;26;26	Q6ZWY8	Q6ZWY8	Thymosin beta-10	Tmsb10	sp|Q6ZWY8|TYB10_MOUSE Thymosin beta-10 OS=Mus musculus GN=Tmsb10 PE=1 SV=3;tr|A0A0N4SVF0|A0A0N4SVF0_MOUSE Thymosin beta-10 OS=Mus musculus GN=Tmsb10 PE=1 SV=1	0.999997	55.5775	0.000444256	128.81	90.724	128.81	0.999997	55.5775	0.000444256	128.81						1	K	ASFDKAKLKKTETQEKNTLPTKETIEQEKRS	X;X;X;X;Lactic acid;X;X;X;X;X;X;X;X;X;X;Lactic acid;X;X;X;X;X;Lactic acid;X;X;X;X;X;X;X;X;X	XXXXXXXXXPPPPPPPPPPPPPXXXXXXXXX	TETQEK(1)NTLPTK	TETQEK(55.58)NTLPTK(-55.58)	6	2	0.51582	3560900	3560900	0	0	NaN	960940	0	NaN	NaN	960940	0	0	0	0	0	NaN	NaN	NaN
Q6ZWY8;A0A0N4SVF0;CON__P21752	32;32;32	Q6ZWY8	Q6ZWY8	Thymosin beta-10	Tmsb10	sp|Q6ZWY8|TYB10_MOUSE Thymosin beta-10 OS=Mus musculus GN=Tmsb10 PE=1 SV=3;tr|A0A0N4SVF0|A0A0N4SVF0_MOUSE Thymosin beta-10 OS=Mus musculus GN=Tmsb10 PE=1 SV=1	0.996043	24.0092	0.0178373	60.434	24.009	60.434	0.996043	24.0092	0.0178373	60.434						1	K	KLKKTETQEKNTLPTKETIEQEKRSEIS___	X;X;X;X;X;X;X;X;X;X;X;X;X;X;X;Lactic acid;X;X;X;X;X;X;X;X;X;X;X;X;X;X;X	XXXXXXXXXXPPPPPPPPPPPPPXXXXXXXX	NTLPTK(0.996)ETIEQEK(0.004)	NTLPTK(24.01)ETIEQEK(-24.01)	6	2	-1.2333	726630	726630	0	0	NaN	726630	0	NaN	NaN	726630	0	0	0	0	0	NaN	NaN	NaN
Q922I7;Q8BGJ5;Q8CB58	434;408;368	Q922I7	Q922I7		Ptbp1	tr|Q922I7|Q922I7_MOUSE MCG13402, isoform CRA_c OS=Mus musculus GN=Ptbp1 PE=1 SV=1;tr|Q8BGJ5|Q8BGJ5_MOUSE MCG13402, isoform CRA_a OS=Mus musculus GN=Ptbp1 PE=1 SV=1;tr|Q8CB58|Q8CB58_MOUSE MCG13402, isoform CRA_d OS=Mus musculus GN=Ptbp1 PE=1 SV=1	1	99.5307	0.000969074	99.531	68.659	99.531					1	99.5307	0.000969074	99.531		1	K	NGHKLHGKSVRITLSKHQSVQLPREGQEDQG	X;X;X;X;X;X;X;X;X;X;X;X;X;X;X;Lactic acid;X;X;X;X;X;X;X;X;X;X;X;X;X;X;X	XXXXXXXXXXXPPPPPPPPPPPPPXXXXXXX	ITLSK(1)HQSVQLPR	ITLSK(99.53)HQSVQLPR	5	3	-0.81478	2254100	2254100	0	0	NaN	0	2254100	NaN	NaN	0	0	0	2254100	0	0	NaN	NaN	NaN
Q8BHZ4	483	Q8BHZ4	Q8BHZ4	Zinc finger protein 592	Znf592	sp|Q8BHZ4|ZN592_MOUSE Zinc finger protein 592 OS=Mus musculus GN=Znf592 PE=1 SV=3	0.576638	1.34191	0.000663413	73.985	42.051	73.985					0.576638	1.34191	0.000663413	73.985		1	K	SRVPKGSALNSQASKKQQSTAPQASTPAASL	X;X;X;X;X;X;X;X;X;X;X;X;X;X;X;Lactic acid;X;X;X;X;X;X;X;X;X;X;X;X;X;X;X	XXXXXPPPPPPPPPPPXXXXXXXXXXXXXXX	GSALNSQASK(0.423)K(0.577)	GSALNSQASK(-1.34)K(1.34)	11	2	1.1305	0	0	0	0	NaN	0	0	NaN	NaN	0	0	0	0	0	0	NaN	NaN	NaN
Q8BHZ4;S4R1H5;S4R2I9;Q6NXK2	379;366;366;366	Q8BHZ4	Q8BHZ4	Zinc finger protein 592;Zinc finger protein 532	Znf592;Zfp532;Znf532	sp|Q8BHZ4|ZN592_MOUSE Zinc finger protein 592 OS=Mus musculus GN=Znf592 PE=1 SV=3;tr|S4R1H5|S4R1H5_MOUSE Zinc finger protein 532 (Fragment) OS=Mus musculus GN=Zfp532 PE=1 SV=1;tr|S4R2I9|S4R2I9_MOUSE Zinc finger protein 532 OS=Mus musculus GN=Zfp532 PE=1 SV	1	84.0547	0.00300184	108.98	42.295	108.98					1	84.0547	0.00300184	108.98		1	K	ASSPPAIPKVRIKTIKTSSGEIKRTVTRILP	X;X;X;X;X;X;X;X;X;X;X;X;X;X;X;Lactic acid;X;X;X;X;X;X;X;X;X;X;X;X;X;X;X	XXXXXXXXXXXXXPPPPPPPPPPXXXXXXXX	TIK(1)TSSGEIK	TIK(84.05)TSSGEIK(-84.05)	3	2	-0.15814	2689800	2689800	0	0	NaN	0	2689800	NaN	NaN	0	0	0	2689800	0	0	NaN	NaN	NaN
Q8C9B9	1432	Q8C9B9	Q8C9B9	Death-inducer obliterator 1	Dido1	sp|Q8C9B9|DIDO1_MOUSE Death-inducer obliterator 1 OS=Mus musculus GN=Dido1 PE=1 SV=4	0.999923	41.1202	0.0224568	46.844	9.163	46.844	0.999923	41.1202	0.0224568	46.844						1	K	EVAYDPEDETILEEAKVTIDDLPNRMCMKVS	X;X;X;X;X;X;X;X;X;X;X;X;X;X;X;Lactic acid;X;X;X;X;X;X;X;X;X;Oxidation (M);X;X;X;X;X	XXXXXXXXXXXXXPPPPPPPPPPPPPPPPXX	EAK(1)VTIDDLPNRMCMK	EAK(41.12)VTIDDLPNRMCMK(-41.12)	3	2	-1.8482	1265600	1265600	0	0	NaN	1265600	0	NaN	NaN	1265600	0	0	0	0	0	NaN	NaN	NaN
Q8CCJ9	280	Q8CCJ9	Q8CCJ9	PHD finger protein 20-like protein 1	Phf20l1	sp|Q8CCJ9|P20L1_MOUSE PHD finger protein 20-like protein 1 OS=Mus musculus GN=Phf20l1 PE=1 SV=2	0.999972	45.5111	0.013428	50.452	16.065	50.452					0.999972	45.5111	0.013428	50.452		1	K	NNQGNSFQAKRARLNKITGLLASKAVGVDGA	X;X;X;X;X;X;X;X;X;X;X;X;X;X;X;Lactic acid;X;X;X;X;X;X;X;X;X;X;X;X;X;X;X	XXXXXXXXXXXXXPPPPPPPPPPPXXXXXXX	LNK(1)ITGLLASK	LNK(45.51)ITGLLASK(-45.51)	3	2	2.0632	0	0	0	0	NaN	0	0	NaN	NaN	0	0	0	0	0	0	NaN	NaN	NaN
Q8CFE3	4	Q8CFE3	Q8CFE3	REST corepressor 1	Rcor1	sp|Q8CFE3|RCOR1_MOUSE REST corepressor 1 OS=Mus musculus GN=Rcor1 PE=1 SV=2	0.99084	20.3413	0.0263244	43.77	9.9732	43.77					0.99084	20.3413	0.0263244	43.77		1	K	____________MVEKGPEVSGKRRGRNTAA	X;X;X;X;X;X;X;X;X;X;X;X;X;X;X;Lactic acid;X;X;X;X;X;X;X;X;X;X;X;X;X;X;X	XXXXXXXXXXXXXPPPPPPPPPPXXXXXXXX	VEK(0.991)GPEVSGK(0.009)	VEK(20.34)GPEVSGK(-20.34)	3	2	0.2302	0	0	0	0	NaN	0	0	NaN	NaN	0	0	0	0	0	0	NaN	NaN	NaN
Q8CGP2	6	Q8CGP2	Q8CGP2	Histone H2B type 1-P	Hist1h2bp	sp|Q8CGP2|H2B1P_MOUSE Histone H2B type 1-P OS=Mus musculus GN=Hist1h2bp PE=1 SV=3	0.99966	34.6899	0.00776952	88.441	58.631	88.441					0.99966	34.6899	0.00776952	88.441		1	K	__________MPEPVKSVPAPKKGSKKAVTK	X;X;X;X;X;X;X;X;X;X;X;X;X;X;X;Lactic acid;X;X;X;X;X;X;X;X;X;X;X;X;X;X;X	XXXXXXXXXXXPPPPPPPPPPPXXXXXXXXX	PEPVK(1)SVPAPK	PEPVK(34.69)SVPAPK(-34.69)	5	2	-0.20746	3440600	3440600	0	0	NaN	0	3440600	NaN	NaN	0	0	0	3440600	0	0	NaN	NaN	NaN
Q8CIN4	52	Q8CIN4	Q8CIN4	Serine/threonine-protein kinase PAK 2;PAK-2p27;PAK-2p34	Pak2	sp|Q8CIN4|PAK2_MOUSE Serine/threonine-protein kinase PAK 2 OS=Mus musculus GN=Pak2 PE=1 SV=1	1	119.528	0.00162916	119.53	50.794	119.53	1	88.4955	0.00204167	88.496	1	119.528	0.00162916	119.53		1	K	LKPLPSVPEEKKPRNKIISIFSGTEKGSKKK	X;X;X;X;X;X;X;X;X;X;X;X;X;X;X;Lactic acid;X;X;X;X;X;X;X;X;X;X;X;X;X;X;X	XXXXXXXXXXXXXXPPPPPPPPPPPPXXXXX	NK(1)IISIFSGTEK	NK(119.53)IISIFSGTEK(-119.53)	2	2	-0.14847	3593500	3593500	0	0	NaN	0	3593500	NaN	NaN	0	0	0	3593500	0	0	NaN	NaN	NaN
Q8K003	60	Q8K003	Q8K003	Translation machinery-associated protein 7	Tma7	sp|Q8K003|TMA7_MOUSE Translation machinery-associated protein 7 OS=Mus musculus GN=Tma7 PE=3 SV=1	0.623887	2.19787	0.0011707	109.86	75.055	109.86					0.623887	2.19787	0.0011707	109.86		1	K	AKAAGKGPLATGGIKKSGKK___________	X;X;X;X;X;X;X;X;X;X;X;X;X;X;X;Lactic acid;X;X;X;X;X;X;X;X;X;X;X;X;X;X;X	XXXXXXPPPPPPPPPPXXXXXXXXXXXXXXX	GPLATGGIK(0.376)K(0.624)	GPLATGGIK(-2.2)K(2.2)	10	2	-0.11588	1938200	1938200	0	0	NaN	0	1938200	NaN	NaN	0	0	0	1938200	0	0	NaN	NaN	NaN
Q8K2F0	683	Q8K2F0	Q8K2F0	Bromodomain-containing protein 3	Brd3	sp|Q8K2F0|BRD3_MOUSE Bromodomain-containing protein 3 OS=Mus musculus GN=Brd3 PE=1 SV=2	0.578191	2.11873	0.0240657	46.926	33.789	46.926					0.578191	2.11873	0.0240657	46.926		1	K	ELEKRLQDVSGQLNSKKPTKKEKSGSAPSGG	X;X;X;X;X;X;X;X;X;X;X;X;X;X;X;Lactic acid;X;X;X;X;X;X;X;X;X;X;X;X;X;X;X	XXXXXPPPPPPPPPPPPPPPXXXXXXXXXXX	LQDVSGQLNSK(0.578)K(0.355)PTK(0.067)	LQDVSGQLNSK(2.12)K(-2.12)PTK(-9.37)	11	3	-0.23705	1385100	1385100	0	0	NaN	0	1385100	NaN	NaN	0	0	0	1385100	0	0	NaN	NaN	NaN
Q8K2T8	119	Q8K2T8	Q8K2T8	RNA polymerase II-associated factor 1 homolog	Paf1	sp|Q8K2T8|PAF1_MOUSE RNA polymerase II-associated factor 1 homolog OS=Mus musculus GN=Paf1 PE=1 SV=1	1	71.3794	0.017804	71.379	10.79	71.379					1	71.3794	0.017804	71.379		1	K	DEKLLEEEIQAPTSSKRSQQHAKVVPWMRKT	X;X;X;X;X;X;X;X;X;X;X;X;X;X;X;Lactic acid;X;X;X;X;X;X;X;X;X;X;X;X;X;X;X	XXXXXXXXPPPPPPPPPXXXXXXXXXXXXXX	IQAPTSSK(1)R	IQAPTSSK(71.38)R	8	2	2.8031	719350	719350	0	0	NaN	0	719350	NaN	NaN	0	0	0	719350	0	0	NaN	NaN	NaN
Q8R0G9	134	Q8R0G9	Q8R0G9	Nuclear pore complex protein Nup133	Nup133	sp|Q8R0G9|NU133_MOUSE Nuclear pore complex protein Nup133 OS=Mus musculus GN=Nup133 PE=1 SV=2	0.997284	25.6482	0.00796778	87.298	68.553	87.298					0.997284	25.6482	0.00796778	87.298		1	K	TEKLLIWKIAVSPVTKLSVCKELQLPPSDFH	X;X;X;X;X;X;X;X;X;X;X;X;X;X;X;Lactic acid;X;X;X;X;X;X;X;X;X;X;X;X;X;X;X	XXXXXXXXPPPPPPPPPPPPPXXXXXXXXXX	IAVSPVTK(0.997)LSVCK(0.003)	IAVSPVTK(25.65)LSVCK(-25.65)	8	2	-0.14684	647540	647540	0	0	NaN	0	647540	NaN	NaN	0	0	0	647540	0	0	NaN	NaN	NaN
Q8R326	519	Q8R326	Q8R326	Paraspeckle component 1	Pspc1	sp|Q8R326|PSPC1_MOUSE Paraspeckle component 1 OS=Mus musculus GN=Pspc1 PE=1 SV=1	1	84.6583	0.00673557	84.658	72.042	84.658					1	84.6583	0.00673557	84.658		1	K	GFGRGSQGGNFEGPNKRRRY___________	X;X;X;X;X;X;X;X;X;X;X;X;X;X;X;Lactic acid;X;X;X;X;X;X;X;X;X;X;X;X;X;X;X	XXXXPPPPPPPPPPPPPXXXXXXXXXXXXXX	GSQGGNFEGPNK(1)R	GSQGGNFEGPNK(84.66)R	12	2	0.99625	1234700	1234700	0	0	NaN	0	1234700	NaN	NaN	0	0	0	1234700	0	0	NaN	NaN	NaN
Q8R326	14	Q8R326	Q8R326	Paraspeckle component 1	Pspc1	sp|Q8R326|PSPC1_MOUSE Paraspeckle component 1 OS=Mus musculus GN=Pspc1 PE=1 SV=1	1	114.023	0.027915	114.02	69.412	114.02					1	114.023	0.027915	114.02		1	K	__MMLRGNLKQVRIEKNPARLRALESAAGES	X;X;X;X;X;X;X;X;X;X;X;X;X;X;X;Lactic acid;X;X;X;X;X;X;X;X;X;X;X;X;X;X;X	XXXXXXXXXXXXXPPPPPPPXXXXXXXXXXX	IEK(1)NPAR	IEK(114.02)NPAR	3	2	1.7301	11704000	11704000	0	0	NaN	0	11704000	NaN	NaN	0	0	0	11704000	0	0	NaN	NaN	NaN
Q91VM5;Q9WV02;A2AFI3;S4R1F6	147;150;150;22	Q91VM5	Q91VM5	RNA binding motif protein, X-linked-like-1;RNA-binding motif protein, X chromosome;RNA-binding motif protein, X chromosome, N-terminally processed	Rbmxl1;Rbmx	sp|Q91VM5|RMXL1_MOUSE RNA binding motif protein, X-linked-like-1 OS=Mus musculus GN=Rbmxl1 PE=2 SV=1;sp|Q9WV02|RBMX_MOUSE RNA-binding motif protein, X chromosome OS=Mus musculus GN=Rbmx PE=1 SV=1;tr|A2AFI3|A2AFI3_MOUSE RNA binding motif protein, X chromoso	1	113.82	0.0112722	113.82	60.266	113.82					1	113.82	0.0112722	113.82		1	K	SMNFNMSSSRGPLPVKRGPPPRSGGPPPKRS	X;X;X;X;X;X;X;X;X;X;X;X;X;X;X;Lactic acid;X;X;X;X;X;X;X;X;X;X;X;X;X;X;X	XXXXXXXXXXPPPPPPPXXXXXXXXXXXXXX	GPLPVK(1)R	GPLPVK(113.82)R	6	2	0.026916	5518500	5518500	0	0	NaN	0	5518500	NaN	NaN	0	0	0	5518500	0	0	NaN	NaN	NaN
Q91VW5	736	Q91VW5	Q91VW5	Golgin subfamily A member 4	Golga4	sp|Q91VW5|GOGA4_MOUSE Golgin subfamily A member 4 OS=Mus musculus GN=Golga4 PE=1 SV=2	0.5	0	0.029105	68.735	19.938	68.735	0.5	0	0.029105	68.735						1	K	DQLAEELSVLRGDADKMKQALEAELEEQRRH	X;X;X;X;X;X;X;X;X;X;X;X;X;X;X;Lactic acid;X;X;X;X;X;X;X;X;X;X;X;X;X;X;X	XXXXXXPPPPPPPPPPPPXXXXXXXXXXXXX	LSVLRGDADK(0.5)MK(0.5)	LSVLRGDADK(0)MK(0)	10	2	-2.2155	2304900	2304900	0	0	NaN	2304900	0	NaN	NaN	2304900	0	0	0	0	0	NaN	NaN	NaN
Q91VW5	738	Q91VW5	Q91VW5	Golgin subfamily A member 4	Golga4	sp|Q91VW5|GOGA4_MOUSE Golgin subfamily A member 4 OS=Mus musculus GN=Golga4 PE=1 SV=2	0.5	0	0.029105	68.735	19.938	68.735	0.5	0	0.029105	68.735						1	K	LAEELSVLRGDADKMKQALEAELEEQRRHHQ	X;X;X;X;X;X;X;X;X;X;X;X;X;X;X;X;X;X;X;X;X;X;X;X;X;X;X;X;X;X;X	XXXXXXXXXXXXXXXXXXXXXXXXXXXXXXX	LSVLRGDADK(0.5)MK(0.5)	LSVLRGDADK(0)MK(0)	12	2	-2.2155	2304900	2304900	0	0	NaN	2304900	0	NaN	NaN	2304900	0	0	0	0	0	NaN	NaN	NaN
Q923D5	590	Q923D5	Q923D5	WW domain-binding protein 11	Wbp11	sp|Q923D5|WBP11_MOUSE WW domain-binding protein 11 OS=Mus musculus GN=Wbp11 PE=1 SV=2	1	54.4164	0.0289829	54.416	40.837	54.416					1	54.4164	0.0289829	54.416		1	K	VTRFVPTALRVRRENKGATAVPQRRSEDDSA	X;X;X;X;X;X;X;X;X;X;X;X;X;X;X;Lactic acid;X;X;X;X;X;X;X;X;X;X;X;X;X;X;X	XXXXXXXXXXXXXPPPPPPPPPPPXXXXXXX	ENK(1)GATAVPQR	ENK(54.42)GATAVPQR	3	2	-0.16897	0	0	0	0	NaN	0	0	NaN	NaN	0	0	0	0	0	0	NaN	NaN	NaN
Q99020;Q20BD0;Q80XR6	198;198;198	Q99020	Q99020	Heterogeneous nuclear ribonucleoprotein A/B	Hnrnpab	sp|Q99020|ROAA_MOUSE Heterogeneous nuclear ribonucleoprotein A/B OS=Mus musculus GN=Hnrnpab PE=1 SV=1;tr|Q20BD0|Q20BD0_MOUSE Heterogeneous nuclear ribonucleoprotein A/B OS=Mus musculus GN=Hnrnpab PE=1 SV=1;tr|Q80XR6|Q80XR6_MOUSE Heterogeneous nuclear ribon	0.673201	3.13863	0.00871266	82.287	68.13	82.287					0.673201	3.13863	0.00871266	82.287		1	K	GEIEAIELPIDPKLNKRRGFVFITFKEEDPV	X;X;X;X;X;X;X;X;X;X;X;X;X;X;X;Lactic acid;X;X;X;X;X;X;X;X;X;X;X;X;X;X;X	XXXXPPPPPPPPPPPPXXXXXXXXXXXXXXX	AIELPIDPK(0.327)LNK(0.673)	AIELPIDPK(-3.14)LNK(3.14)	12	2	0.14959	1555500	1555500	0	0	NaN	0	1555500	NaN	NaN	0	0	0	1555500	0	0	NaN	NaN	NaN
Q99020	271	Q99020	Q99020	Heterogeneous nuclear ribonucleoprotein A/B	Hnrnpab	sp|Q99020|ROAA_MOUSE Heterogeneous nuclear ribonucleoprotein A/B OS=Mus musculus GN=Hnrnpab PE=1 SV=1	1	61.6409	1.44672e-20	205.8	187.99	61.641					1	61.6409	1.44672e-20	205.8		1	K	GNRGSGGGQGSTNYGKSQRRGGHQNNYKPY_	X;X;X;X;X;X;X;X;X;X;X;X;X;X;X;Lactic acid;X;X;X;X;X;X;X;X;X;X;X;X;X;X;X	XXXPPPPPPPPPPPPPPPPXXXXXXXXXXXX	GSGGGQGSTNYGK(1)SQR	GSGGGQGSTNYGK(61.64)SQR	13	3	0.47843	23346000	23346000	0	0	NaN	0	15085000	NaN	NaN	0	0	0	15085000	0	0	NaN	NaN	NaN
Q99J36	15	Q99J36	Q99J36	THUMP domain-containing protein 1	Thumpd1	sp|Q99J36|THUM1_MOUSE THUMP domain-containing protein 1 OS=Mus musculus GN=Thumpd1 PE=1 SV=1	1	124.103	5.79052e-05	124.1	77.945	124.1					1	124.103	5.79052e-05	124.1		1	K	_MATTAQQSPQPVAGKRKGKSQFLPAKRARR	X;X;X;X;X;X;X;X;X;X;X;X;X;X;X;Lactic acid;X;X;X;Lactic acid;X;X;X;X;X;X;Lactic acid;X;X;X;X	XXPPPPPPPPPPPPPPPXXXXXXXXXXXXXX	ATTAQQSPQPVAGK(1)R	ATTAQQSPQPVAGK(124.1)R	14	2	1.0581	1581700	1581700	0	0	NaN	0	1581700	NaN	NaN	0	0	0	1581700	0	0	NaN	NaN	NaN
Q99J36	19	Q99J36	Q99J36	THUMP domain-containing protein 1	Thumpd1	sp|Q99J36|THUM1_MOUSE THUMP domain-containing protein 1 OS=Mus musculus GN=Thumpd1 PE=1 SV=1	1	92.9093	0.00279665	111.61	52.626	94.114					1	92.9093	0.00279665	111.61		1	K	TAQQSPQPVAGKRKGKSQFLPAKRARRGDAG	X;X;X;X;X;X;X;X;X;X;X;Lactic acid;X;X;X;Lactic acid;X;X;X;X;X;X;Lactic acid;X;X;X;X;X;X;X;X	XXXXXXXXXXXXXPPPPPPPPPPXXXXXXXX	GK(1)SQFLPAK	GK(92.91)SQFLPAK(-92.91)	2	2	1.3166	3630400	3630400	0	0	NaN	0	1553000	NaN	NaN	0	0	0	1553000	0	0	NaN	NaN	NaN
Q99J36	26	Q99J36	Q99J36	THUMP domain-containing protein 1	Thumpd1	sp|Q99J36|THUM1_MOUSE THUMP domain-containing protein 1 OS=Mus musculus GN=Thumpd1 PE=1 SV=1	1	54.5493	0.00961332	54.549	34.913	54.549					1	54.5493	0.00961332	54.549		1	K	PVAGKRKGKSQFLPAKRARRGDAGGPRQLEP	X;X;X;X;Lactic acid;X;X;X;X;X;X;X;X;X;X;Lactic acid;X;X;X;X;X;X;X;X;X;X;X;X;X;X;X	XXXXXXXXXPPPPPPPPXXXXXXXXXXXXXX	SQFLPAK(1)R	SQFLPAK(54.55)R	7	2	-0.28755	0	0	0	0	NaN	0	0	NaN	NaN	0	0	0	0	0	0	NaN	NaN	NaN
Q99JF8;A2BI12	143;143	Q99JF8	Q99JF8	PC4 and SFRS1-interacting protein	Psip1	sp|Q99JF8|PSIP1_MOUSE PC4 and SFRS1-interacting protein OS=Mus musculus GN=Psip1 PE=1 SV=1;tr|A2BI12|A2BI12_MOUSE PC4 and SFRS1-interacting protein OS=Mus musculus GN=Psip1 PE=1 SV=1	1	75.3782	0.0107141	75.378	33.399	75.378					1	75.3782	0.0107141	75.378			K	ASNEDVTKAVDITTPKAARRGRKRKAEKQVD	X;X;X;X;X;X;X;X;X;X;X;X;X;X;X;Lactic acid;X;X;X;X;X;X;X;X;X;X;X;X;X;X;X	XXXXXXXXPPPPPPPPPPPXXXXXXXXXXXX	AVDITTPK(1)AAR	AVDITTPK(75.38)AAR	8	2	-1.3616	1535800	1535800	0	0	NaN	0	1535800	NaN	NaN	0	0	0	1535800	0	0	NaN	NaN	NaN
Q99JF8;A2BI12;F6W677	302;302;32	Q99JF8	Q99JF8	PC4 and SFRS1-interacting protein	Psip1	sp|Q99JF8|PSIP1_MOUSE PC4 and SFRS1-interacting protein OS=Mus musculus GN=Psip1 PE=1 SV=1;tr|A2BI12|A2BI12_MOUSE PC4 and SFRS1-interacting protein OS=Mus musculus GN=Psip1 PE=1 SV=1;tr|F6W677|F6W677_MOUSE PC4 and SFRS1-interacting protein (Fragment) OS=Mu	1	72.1071	5.60639e-10	134.77	75.951	134.77					1	72.1071	5.60639e-10	134.77		1	K	KGGRNFQAAHRRNMLKGQHEKEAGDRKRKQE	X;X;X;X;X;X;X;X;X;X;X;X;X;X;X;Lactic acid;X;X;X;X;X;X;X;X;X;X;X;X;X;X;X	XXXXXXXXXXXXPPPPPPPPPXXXXXXXXXX	NMLK(1)GQHEK	NMLK(72.11)GQHEK(-72.11)	4	2	0.45807	0	0	0	0	NaN	0	0	NaN	NaN	0	0	0	0	0	0	NaN	NaN	NaN
Q99JF8;A2BI12	200;200	Q99JF8	Q99JF8	PC4 and SFRS1-interacting protein	Psip1	sp|Q99JF8|PSIP1_MOUSE PC4 and SFRS1-interacting protein OS=Mus musculus GN=Psip1 PE=1 SV=1;tr|A2BI12|A2BI12_MOUSE PC4 and SFRS1-interacting protein OS=Mus musculus GN=Psip1 PE=1 SV=1	0.999999	61.3305	0.00176572	62.891	54.07	62.891					0.999999	61.3305	0.00176572	62.891		1	K	TEVKIPKPRGRPKVVKQPCPSDGDMVIDEDK	X;X;X;X;X;X;X;X;X;X;X;X;X;X;X;Lactic acid;X;X;X;X;X;X;X;X;X;X;X;X;X;X;X	XXXXXXXXXXXXXPPPPPPPPPPPPPPPPPP	VVK(1)QPCPSDGDMVIDEDK	VVK(61.33)QPCPSDGDMVIDEDK(-61.33)	3	2	-1.1362	1649400	1649400	0	0	NaN	0	1649400	NaN	NaN	0	0	0	1649400	0	0	NaN	NaN	NaN
Q99JX1	49	Q99JX1	Q99JX1	Transcription initiation factor TFIID subunit 11	Taf11	sp|Q99JX1|TAF11_MOUSE Transcription initiation factor TFIID subunit 11 OS=Mus musculus GN=Taf11 PE=2 SV=1	1	81.7839	0.0141565	81.784	26.343	81.784	1	72.1384	0.0237434	72.138	1	81.7839	0.0141565	81.784		1	K	EGIPEETDRDGDADLKEAAAEESELKSQDVS	X;X;X;X;X;X;X;X;X;X;X;X;X;X;X;Lactic acid;X;X;X;X;X;X;X;X;X;X;X;X;X;X;X	XXXXXXXXXPPPPPPPPXXXXXXXXXXXXXX	DGDADLK(1)E	DGDADLK(81.78)E	7	2	1.5427	3485900	3485900	0	0	NaN	1458600	2027300	NaN	NaN	1458600	0	0	2027300	0	0	NaN	NaN	NaN
Q99K48	373	Q99K48	Q99K48	Non-POU domain-containing octamer-binding protein	Nono	sp|Q99K48|NONO_MOUSE Non-POU domain-containing octamer-binding protein OS=Mus musculus GN=Nono PE=1 SV=3	1	94.8498	0.00797055	94.85	57.301	94.85					1	94.8498	0.00797055	94.85		1	K	RRQQEEMMRRQQEGFKGTFPDAREQEIRMGQ	X;X;X;X;X;X;X;X;X;X;X;X;X;X;X;Lactic acid;X;X;X;X;X;X;X;X;X;X;X;X;X;X;X	XXXXXXXXXXXXXPPPPPPPPPPXXXXXXXX	GFK(1)GTFPDAR	GFK(94.85)GTFPDAR	3	2	-2.2648	3123100	3123100	0	0	NaN	0	3123100	NaN	NaN	0	0	0	3123100	0	0	NaN	NaN	NaN
Q99K48;B1AXT0	62;62	Q99K48	Q99K48	Non-POU domain-containing octamer-binding protein	Nono	sp|Q99K48|NONO_MOUSE Non-POU domain-containing octamer-binding protein OS=Mus musculus GN=Nono PE=1 SV=3;tr|B1AXT0|B1AXT0_MOUSE Non-POU domain-containing octamer-binding protein (Fragment) OS=Mus musculus GN=Nono PE=1 SV=1	1	83.0052	0.0173506	83.005	44.712	83.005					1	83.0052	0.0173506	83.005		1	K	GQQASSQNEGLTIDLKNFRKPGEKTFTQRSR	X;X;X;X;X;X;X;X;X;X;X;X;X;X;X;Lactic acid;X;X;X;X;X;X;X;X;X;X;X;X;X;X;X	XXXXXXXXXPPPPPPPPPPXXXXXXXXXXXX	GLTIDLK(1)NFR	GLTIDLK(83.01)NFR	7	2	0.38022	547150	547150	0	0	NaN	0	547150	NaN	NaN	0	0	0	547150	0	0	NaN	NaN	NaN
Q99K48;B1AXT0	5;5	Q99K48	Q99K48	Non-POU domain-containing octamer-binding protein	Nono	sp|Q99K48|NONO_MOUSE Non-POU domain-containing octamer-binding protein OS=Mus musculus GN=Nono PE=1 SV=3;tr|B1AXT0|B1AXT0_MOUSE Non-POU domain-containing octamer-binding protein (Fragment) OS=Mus musculus GN=Nono PE=1 SV=1	1	76.6272	0.000109242	121.61	91.044	121.61	0.999977	46.3674	0.00906419	57.532	1	76.6272	0.000109242	121.61		1	K	___________MQSNKAFNLEKQNHTPRKHH	X;X;X;X;X;X;X;X;X;X;X;X;X;X;X;Lactic acid;X;X;X;X;X;X;X;X;X;X;X;X;X;X;X	XXXXXXXXXXXPPPPPPPPPPPXXXXXXXXX	MQSNK(1)AFNLEK	MQSNK(76.63)AFNLEK(-76.63)	5	2	0.47064	2872900	2872900	0	0	NaN	0	2872900	NaN	NaN	0	0	0	2872900	0	0	NaN	NaN	NaN
Q9CPW7	8	Q9CPW7	Q9CPW7	Zinc finger matrin-type protein 2	Zmat2	sp|Q9CPW7|ZMAT2_MOUSE Zinc finger matrin-type protein 2 OS=Mus musculus GN=Zmat2 PE=2 SV=1	1	107.831	0.000119065	107.83	74.991	107.83					1	107.831	0.000119065	107.83		1	K	________MASGSGTKNLDFRRKWDKDEYEK	X;X;X;X;X;X;X;X;X;X;X;X;X;X;X;Lactic acid;X;X;X;X;X;X;X;X;X;X;X;X;X;X;X	XXXXXXXXXPPPPPPPPPPPPXXXXXXXXXX	ASGSGTK(1)NLDFR	ASGSGTK(107.83)NLDFR	7	2	-1.7134	1135100	1135100	0	0	NaN	0	1135100	NaN	NaN	0	0	0	1135100	0	0	NaN	NaN	NaN
Q9CQW1	141	Q9CQW1	Q9CQW1	Synaptobrevin homolog YKT6	Ykt6	sp|Q9CQW1|YKT6_MOUSE Synaptobrevin homolog YKT6 OS=Mus musculus GN=Ykt6 PE=1 SV=1	1	93.5976	0.00539765	93.598	44.062	93.598					1	93.5976	0.00539765	93.598		1	K	HLSKYQNPREADPMSKVQAELDETKIILHNT	X;X;X;X;X;X;X;X;X;X;X;X;X;X;X;Lactic acid;X;X;X;X;X;X;X;X;X;X;X;X;X;X;X	XXXXXXXXXPPPPPPPPPPPXXXXXXXXXXX	EADPMSK(1)VQAE	EADPMSK(93.6)VQAE	7	2	0.96772	1378600	1378600	0	0	NaN	0	1378600	NaN	NaN	0	0	0	1378600	0	0	NaN	NaN	NaN
Q9CSH3	18	Q9CSH3	Q9CSH3	Exosome complex exonuclease RRP44	Dis3	sp|Q9CSH3|RRP44_MOUSE Exosome complex exonuclease RRP44 OS=Mus musculus GN=Dis3 PE=1 SV=4	1	107.317	0.00823103	107.32	71.132	107.32					1	107.317	0.00823103	107.32		1	K	RSKTFLKKTRAGGVVKIVREHYLRDDIGCGA	X;X;X;X;X;X;X;X;X;X;X;X;X;X;X;Lactic acid;X;X;X;X;X;X;X;X;X;X;X;X;X;X;X	XXXXXXXXXXPPPPPPPPPXXXXXXXXXXXX	AGGVVK(1)IVR	AGGVVK(107.32)IVR	6	2	0.064016	1239100	1239100	0	0	NaN	0	1239100	NaN	NaN	0	0	0	1239100	0	0	NaN	NaN	NaN
Q9CU65;Q3U2E2	297;180	Q9CU65	Q9CU65	Zinc finger MYM-type protein 2;Zinc finger MYM-type protein 5	Zmym2;Zmym5	sp|Q9CU65|ZMYM2_MOUSE Zinc finger MYM-type protein 2 OS=Mus musculus GN=Zmym2 PE=1 SV=3;sp|Q3U2E2|ZMYM5_MOUSE Zinc finger MYM-type protein 5 OS=Mus musculus GN=Zmym5 PE=2 SV=2	1	99.9263	2.15516e-05	100.04	89.942	100.04					1	99.9263	2.15516e-05	100.04		1	K	PDSWISQSASFPRNQKQQGVDSLSPVASLPK	X;X;X;X;X;X;X;X;X;X;X;X;X;X;X;Lactic acid;X;X;X;X;X;X;X;X;X;X;X;X;X;X;X	XXXXXXXXXXXXXPPPPPPPPPPPPPPPPPP	NQK(1)QQGVDSLSPVASLPK	NQK(99.93)QQGVDSLSPVASLPK(-99.93)	3	3	-1.0314	2244500	2244500	0	0	NaN	0	2244500	NaN	NaN	0	0	0	2244500	0	0	NaN	NaN	NaN
Q9CU65	531	Q9CU65	Q9CU65	Zinc finger MYM-type protein 2	Zmym2	sp|Q9CU65|ZMYM2_MOUSE Zinc finger MYM-type protein 2 OS=Mus musculus GN=Zmym2 PE=1 SV=3	1	98.2488	8.96479e-05	98.249	71.134	98.249					1	98.2488	8.96479e-05	98.249		1	K	DHMQDSFLMQPEKYGKLTTCTGCRTQCRFFD	X;X;X;X;X;X;X;X;X;X;X;X;X;X;X;Lactic acid;X;X;X;X;X;X;X;X;X;X;X;X;X;X;X	XXXXXXXXXXXXXPPPPPPPPPPPXXXXXXX	YGK(1)LTTCTGCR	YGK(98.25)LTTCTGCR	3	2	1.2717	0	0	0	0	NaN	0	0	NaN	NaN	0	0	0	0	0	0	NaN	NaN	NaN
Q9CX86	176	Q9CX86	Q9CX86	Heterogeneous nuclear ribonucleoprotein A0	Hnrnpa0	sp|Q9CX86|ROA0_MOUSE Heterogeneous nuclear ribonucleoprotein A0 OS=Mus musculus GN=Hnrnpa0 PE=1 SV=1	1	43.3163	0.0294229	43.316	22.363	43.316					1	43.3163	0.0294229	43.316		1	K	HPIQGHRVEVKKAVPKEDIHAGGGGARAARG	X;X;X;X;X;X;X;X;X;X;X;X;X;X;X;Lactic acid;X;X;X;X;X;X;X;X;X;X;X;X;X;X;X	XXXXXXXXXXXXPPPPPPPPPPPPPPPXXXX	AVPK(1)EDIHAGGGGAR	AVPK(43.32)EDIHAGGGGAR	4	3	-1.4221	1745900	1745900	0	0	NaN	0	1745900	NaN	NaN	0	0	0	1745900	0	0	NaN	NaN	NaN
Q9CZU6	321	Q9CZU6	Q9CZU6	Citrate synthase, mitochondrial	Cs	sp|Q9CZU6|CISY_MOUSE Citrate synthase, mitochondrial OS=Mus musculus GN=Cs PE=1 SV=1	0.999916	40.7624	0.00910467	57.859	33.083	57.859					0.999916	40.7624	0.00910467	57.859			K	QEVLVWLTQLQKEVGKDVSDEKLRDYIWNTL	X;X;X;X;X;X;X;X;X;X;X;X;X;X;X;Lactic acid;X;X;X;X;X;X;X;X;X;X;X;X;X;X;X	XXXXXXXXXXXXPPPPPPPPPPXXXXXXXXX	EVGK(1)DVSDEK	EVGK(40.76)DVSDEK(-40.76)	4	2	-0.55806	719060	719060	0	0	NaN	0	719060	NaN	NaN	0	0	0	719060	0	0	NaN	NaN	NaN
Q9D0J8	27	Q9D0J8	Q9D0J8	Parathymosin	Ptms	sp|Q9D0J8|PTMS_MOUSE Parathymosin OS=Mus musculus GN=Ptms PE=1 SV=3	1	77.1378	0.0115364	81.548	38.301	81.548	1	77.1378	0.0115364	81.548						1	K	LSAKDLKEKKDKVEEKAGRKERKKEVVEEEE	X;X;X;Lactic acid;X;X;X;X;X;X;X;X;X;X;X;Lactic acid;X;X;X;X;X;X;X;X;X;X;X;X;X;X;X	XXXXXXXXXXPPPPPPPPPXXXXXXXXXXXX	DKVEEK(1)AGR	DK(-77.14)VEEK(77.14)AGR	6	2	0.080585	3337800	3337800	0	0	NaN	3337800	0	NaN	NaN	3337800	0	0	0	0	0	NaN	NaN	NaN
Q9D0J8	15	Q9D0J8	Q9D0J8	Parathymosin	Ptms	sp|Q9D0J8|PTMS_MOUSE Parathymosin OS=Mus musculus GN=Ptms PE=1 SV=3	0.5	0	0.000652648	79.693	50.735	79.693	0.5	0	0.000652648	79.693							K	_MSEKSVEAAAELSAKDLKEKKDKVEEKAGR	X;X;X;X;X;X;X;X;X;X;X;X;X;X;X;Lactic acid;X;X;X;X;X;X;X;X;X;X;X;Lactic acid;X;X;X	XXXXXPPPPPPPPPPPPPPXXXXXXXXXXXX	SVEAAAELSAK(0.5)DLK(0.5)	SVEAAAELSAK(0)DLK(0)	11	2	0.90675	1361000	1361000	0	0	NaN	1361000	0	NaN	NaN	1361000	0	0	0	0	0	NaN	NaN	NaN
Q9D0J8	18	Q9D0J8	Q9D0J8	Parathymosin	Ptms	sp|Q9D0J8|PTMS_MOUSE Parathymosin OS=Mus musculus GN=Ptms PE=1 SV=3	0.5	0	0.000652648	79.693	50.735	79.693	0.5	0	0.000652648	79.693							K	EKSVEAAAELSAKDLKEKKDKVEEKAGRKER	X;X;X;X;X;X;X;X;X;X;X;X;X;X;X;X;X;X;X;X;X;X;X;X;Lactic acid;X;X;X;X;X;X	XXXXXXXXXXXXXXXXXXXXXXXXXXXXXXX	SVEAAAELSAK(0.5)DLK(0.5)	SVEAAAELSAK(0)DLK(0)	14	2	0.90675	1361000	1361000	0	0	NaN	1361000	0	NaN	NaN	1361000	0	0	0	0	0	NaN	NaN	NaN
Q9D115	7	Q9D115	Q9D115	Zinc finger protein 706	Znf706	sp|Q9D115|ZN706_MOUSE Zinc finger protein 706 OS=Mus musculus GN=Znf706 PE=1 SV=1	0.999986	48.4695	0.00899925	93.551	48.469	93.551					0.999986	48.4695	0.00899925	93.551		1	K	_________MARGQQKIQSQQKNAKKQAGQK	X;X;X;X;X;X;X;X;X;X;X;X;X;X;X;Lactic acid;X;X;X;X;X;X;X;X;X;X;X;X;X;X;X	XXXXXXXXXXXXPPPPPPPPPPXXXXXXXXX	GQQK(1)IQSQQK	GQQK(48.47)IQSQQK(-48.47)	4	2	-0.16046	1164900	1164900	0	0	NaN	0	1164900	NaN	NaN	0	0	0	1164900	0	0	NaN	NaN	NaN
Q9D2R0	633	Q9D2R0	Q9D2R0	Acetoacetyl-CoA synthetase	Aacs	sp|Q9D2R0|AACS_MOUSE Acetoacetyl-CoA synthetase OS=Mus musculus GN=Aacs PE=1 SV=1	0.914863	10.3124	0.00079937	122.13	72.002	122.13					0.914863	10.3124	0.00079937	122.13		1	K	SLILETRGIPYTLNGKKVEVAVKQVMAGRTV	X;X;X;X;X;X;X;X;X;X;X;X;X;X;X;Lactic acid;X;X;X;X;X;X;X;X;X;X;X;X;X;X;X	XXXXXXXPPPPPPPPPPXXXXXXXXXXXXXX	GIPYTLNGK(0.915)K(0.085)	GIPYTLNGK(10.31)K(-10.31)	9	2	1.0177	13254000	13254000	0	0	NaN	0	13254000	NaN	NaN	0	0	0	13254000	0	0	NaN	NaN	NaN
Q9D2R0	634	Q9D2R0	Q9D2R0	Acetoacetyl-CoA synthetase	Aacs	sp|Q9D2R0|AACS_MOUSE Acetoacetyl-CoA synthetase OS=Mus musculus GN=Aacs PE=1 SV=1	0.576795	1.3447	0.0252404	60.59	36.435	60.59	0.576795	1.3447	0.0252404	60.59						1	K	LILETRGIPYTLNGKKVEVAVKQVMAGRTVE	X;X;X;X;X;X;X;X;X;X;X;X;X;X;X;Lactic acid;X;X;X;X;X;X;X;X;X;X;X;X;X;X;X	XXXXXXPPPPPPPPPPXXXXXXXXXXXXXXX	GIPYTLNGK(0.423)K(0.577)	GIPYTLNGK(-1.34)K(1.34)	10	2	3.0884	2020900	2020900	0	0	NaN	2020900	0	NaN	NaN	2020900	0	0	0	0	0	NaN	NaN	NaN
Q9D735	115	Q9D735	Q9D735	Uncharacterized protein C19orf43 homolog		sp|Q9D735|CS043_MOUSE Uncharacterized protein C19orf43 homolog OS=Mus musculus PE=1 SV=1	1	92.5385	0.00169891	92.538	67.701	92.538					1	92.5385	0.00169891	92.538		1	K	PKRKGGPGPTLSFVGKRRGGNKLALKTGIVA	X;X;X;X;X;X;X;X;X;X;X;X;X;X;X;Lactic acid;X;X;X;X;X;X;X;X;X;X;X;X;X;X;X	XXXXPPPPPPPPPPPPPXXXXXXXXXXXXXX	GGPGPTLSFVGK(1)R	GGPGPTLSFVGK(92.54)R	12	2	0.75395	1615300	1615300	0	0	NaN	0	1615300	NaN	NaN	0	0	0	1615300	0	0	NaN	NaN	NaN
Q9D735	132	Q9D735	Q9D735	Uncharacterized protein C19orf43 homolog		sp|Q9D735|CS043_MOUSE Uncharacterized protein C19orf43 homolog OS=Mus musculus PE=1 SV=1	0.600307	1.76648	0.0335654	40.573	13.777	40.573					0.600307	1.76648	0.0335654	40.573			K	RGGNKLALKTGIVAKKQKTEDEVLTSKGDAW	X;X;X;X;X;X;X;X;X;X;X;X;X;X;X;Lactic acid;X;X;X;X;X;X;X;X;X;X;X;X;X;X;X	XXXXXXXXXPPPPPPPXXXXXXXXXXXXXXX	TGIVAK(0.4)K(0.6)	TGIVAK(-1.77)K(1.77)	7	2	0.43327	349140	349140	0	0	NaN	0	349140	NaN	NaN	0	0	0	349140	0	0	NaN	NaN	NaN
Q9DCC8	56	Q9DCC8	Q9DCC8	Mitochondrial import receptor subunit TOM20 homolog	Tomm20	sp|Q9DCC8|TOM20_MOUSE Mitochondrial import receptor subunit TOM20 homolog OS=Mus musculus GN=Tomm20 PE=1 SV=1	0.999999	60.6773	0.0116921	90.15	47.552	90.15					0.999999	60.6773	0.0116921	90.15		1	K	RRKKQKLAKERAGLSKLPDLKDAEAVQKFFL	X;X;X;X;X;X;X;X;X;X;X;X;X;X;X;Lactic acid;X;X;X;X;X;X;X;X;X;X;X;X;X;X;X	XXXXXXXXXXXPPPPPPPPPPXXXXXXXXXX	AGLSK(1)LPDLK	AGLSK(60.68)LPDLK(-60.68)	5	2	0.064738	1480100	1480100	0	0	NaN	0	1480100	NaN	NaN	0	0	0	1480100	0	0	NaN	NaN	NaN
Q9DCT8	112	Q9DCT8	Q9DCT8	Cysteine-rich protein 2	Crip2	sp|Q9DCT8|CRIP2_MOUSE Cysteine-rich protein 2 OS=Mus musculus GN=Crip2 PE=1 SV=1	1	96.562	1.27243e-07	96.562	81.64	96.562					1	96.562	1.27243e-07	96.562		1	K	RTEERKTSGPPKGPSKASSVTTFTGEPNMCP	X;X;X;X;X;X;X;X;X;X;X;X;X;X;X;Lactic acid;X;X;X;X;X;X;X;X;X;X;X;X;X;X;X	XXXXXXXXXXXXPPPPPPPPPPPPPPPPPPP	GPSK(1)ASSVTTFTGEPNMCPR	GPSK(96.56)ASSVTTFTGEPNMCPR	4	3	0.37021	4908500	4908500	0	0	NaN	0	4908500	NaN	NaN	0	0	0	4908500	0	0	NaN	NaN	NaN
Q9EPQ8	1295	Q9EPQ8	Q9EPQ8	Transcription factor 20	Tcf20	sp|Q9EPQ8|TCF20_MOUSE Transcription factor 20 OS=Mus musculus GN=Tcf20 PE=1 SV=3	1	97.4306	0.00175333	97.431	57.363	97.431					1	97.4306	0.00175333	97.431		1	K	IMRRRVRSFISPIPSKRQSQDVKNSNADDKG	X;X;X;X;X;X;X;X;X;X;X;X;X;X;X;Lactic acid;X;X;X;X;X;X;X;X;X;X;X;X;X;X;X	XXXXXXXPPPPPPPPPPXXXXXXXXXXXXXX	SFISPIPSK(1)R	SFISPIPSK(97.43)R	9	2	-0.0054178	3407000	3407000	0	0	NaN	0	3407000	NaN	NaN	0	0	0	3407000	0	0	NaN	NaN	NaN
Q9EPQ8	1238	Q9EPQ8	Q9EPQ8	Transcription factor 20	Tcf20	sp|Q9EPQ8|TCF20_MOUSE Transcription factor 20 OS=Mus musculus GN=Tcf20 PE=1 SV=3	1	59.4259	0.0207938	59.426	40.646	59.426					1	59.4259	0.0207938	59.426		1	K	TSPAKSSGPPGMSNQKRYGPPHEPDGHGLAE	X;X;X;X;X;X;X;X;X;X;X;X;X;X;X;Lactic acid;X;X;X;X;X;X;X;X;X;X;X;X;X;X;X	XXXXXPPPPPPPPPPPPXXXXXXXXXXXXXX	SSGPPGMSNQK(1)R	SSGPPGMSNQK(59.43)R	11	2	0.48747	1252400	1252400	0	0	NaN	0	1252400	NaN	NaN	0	0	0	1252400	0	0	NaN	NaN	NaN
Q9EPQ8	729	Q9EPQ8	Q9EPQ8	Transcription factor 20	Tcf20	sp|Q9EPQ8|TCF20_MOUSE Transcription factor 20 OS=Mus musculus GN=Tcf20 PE=1 SV=3	1	76.4649	0.0185942	76.465	48.723	76.465					1	76.4649	0.0185942	76.465		1	K	HSAVGPSFTGRTEPSKSPGSLRYSYKESFGS	X;X;X;X;X;X;X;X;X;X;X;X;X;X;X;Lactic acid;X;X;X;X;X;X;X;X;X;X;X;X;X;X;X	XXXXXXXXXXXPPPPPPPPPPPXXXXXXXXX	TEPSK(1)SPGSLR	TEPSK(76.46)SPGSLR	5	2	0.11864	632810	632810	0	0	NaN	0	632810	NaN	NaN	0	0	0	632810	0	0	NaN	NaN	NaN
Q9EQB6	305	Q9EQB6	Q9EQB6	Olfactory receptor	Olfr954	tr|Q9EQB6|Q9EQB6_MOUSE Olfactory receptor OS=Mus musculus GN=Olfr954 PE=3 SV=1	1	48.283	0.00980962	48.283	20.954	48.283					1	48.283	0.00980962	48.283		2	K	PLIYSLRNKDVSVAMKKILERKRFM______	X;X;X;X;X;X;X;X;X;X;X;X;X;X;Oxidation (M);Lactic acid;Lactic acid;X;X;X;X;X;X;X;X;X;X;X;X;X;X	XXXXXXXXXPPPPPPPPPPPPXXXXXXXXXX	DVSVAMK(1)K(1)ILER	DVSVAMK(48.28)K(48.28)ILER	7	2	-1.3359	2476900	0	2476900	0	NaN	0	2476900	NaN	NaN	0	0	0	0	2476900	0	NaN	NaN	NaN
Q9EQB6	306	Q9EQB6	Q9EQB6	Olfactory receptor	Olfr954	tr|Q9EQB6|Q9EQB6_MOUSE Olfactory receptor OS=Mus musculus GN=Olfr954 PE=3 SV=1	1	48.283	0.00980962	48.283	20.954	48.283					1	48.283	0.00980962	48.283		2	K	LIYSLRNKDVSVAMKKILERKRFM_______	X;X;X;X;X;X;X;X;X;X;X;X;X;Oxidation (M);Lactic acid;Lactic acid;X;X;X;X;X;X;X;X;X;X;X;X;X;X;X	XXXXXXXXPPPPPPPPPPPPXXXXXXXXXXX	DVSVAMK(1)K(1)ILER	DVSVAMK(48.28)K(48.28)ILER	8	2	-1.3359	2476900	0	2476900	0	NaN	0	2476900	NaN	NaN	0	0	0	0	2476900	0	NaN	NaN	NaN
Q9EQC8	250	Q9EQC8	Q9EQC8		Prcc	tr|Q9EQC8|Q9EQC8_MOUSE Papillary renal cell carcinoma (Translocation-associated) OS=Mus musculus GN=Prcc PE=1 SV=1	1	66.1043	0.00910963	87.568	44.322	87.568					1	66.1043	0.00910963	87.568		1	K	TTTTTPSPSAIKAAAKSAALQVTKQITQEDD	X;X;X;X;X;X;X;X;X;X;X;X;X;X;X;Lactic acid;X;X;X;X;X;X;X;X;X;X;X;X;X;X;X	XXXXXXXXXXXXPPPPPPPPPPPPXXXXXXX	AAAK(1)SAALQVTK	AAAK(66.1)SAALQVTK(-66.1)	4	2	0.3043	1161100	1161100	0	0	NaN	0	1161100	NaN	NaN	0	0	0	1161100	0	0	NaN	NaN	NaN
Q9EQF6	546	Q9EQF6	Q9EQF6	Dihydropyrimidinase-related protein 5	Dpysl5	sp|Q9EQF6|DPYL5_MOUSE Dihydropyrimidinase-related protein 5 OS=Mus musculus GN=Dpysl5 PE=1 SV=1	1	73.2082	0.00011619	73.208	63.109	73.208					1	73.2082	0.00011619	73.208		1	K	SSFSLSGSQIDDHVPKRASARILAPPGGRSS	X;X;X;X;X;X;X;X;X;X;X;X;X;X;X;Lactic acid;X;X;X;X;X;X;X;X;X;X;X;X;X;X;X	PPPPPPPPPPPPPPPPPXXXXXXXXXXXXXX	SSFSLSGSQIDDHVPK(1)R	SSFSLSGSQIDDHVPK(73.21)R	16	3	0.74451	1123600	1123600	0	0	NaN	0	1123600	NaN	NaN	0	0	0	1123600	0	0	NaN	NaN	NaN
Q9EQQ9	597	Q9EQQ9	Q9EQQ9	Protein O-GlcNAcase	Mgea5	sp|Q9EQQ9|OGA_MOUSE Protein O-GlcNAcase OS=Mus musculus GN=Mgea5 PE=1 SV=2	0.840316	7.21183	0.000177189	136.02	109.23	136.02					0.840316	7.21183	0.000177189	136.02		1	K	FQWLRANSSVVSVNCKGKDSEKIEEWRSRAA	X;X;X;X;X;X;X;X;X;X;X;X;X;X;X;Lactic acid;X;X;X;X;X;X;X;X;X;X;X;X;X;X;X	XXXXXPPPPPPPPPPPPPXXXXXXXXXXXXX	ANSSVVSVNCK(0.84)GK(0.16)	ANSSVVSVNCK(7.21)GK(-7.21)	11	2	0.33868	2032700	2032700	0	0	NaN	0	2032700	NaN	NaN	0	0	0	2032700	0	0	NaN	NaN	NaN
Q9JHS9	91	Q9JHS9	Q9JHS9	Spliceosome-associated protein CWC15 homolog	Cwc15	sp|Q9JHS9|CWC15_MOUSE Spliceosome-associated protein CWC15 homolog OS=Mus musculus GN=Cwc15 PE=1 SV=1	0.799302	6.00168	0.00678644	51.359	31.253	51.359					0.799302	6.00168	0.00678644	51.359		1	K	RDRPTREHTTSSSVSKKPRLDQIPAANLDAD	X;X;X;X;X;X;X;X;X;X;X;X;X;X;X;Lactic acid;X;X;X;X;X;X;X;X;X;X;X;X;X;X;X	XXXXXXPPPPPPPPPPPPPXXXXXXXXXXXX	EHTTSSSVSK(0.799)K(0.201)PR	EHTTSSSVSK(6)K(-6)PR	10	4	-0.24301	1148900	1148900	0	0	NaN	0	1148900	NaN	NaN	0	0	0	1148900	0	0	NaN	NaN	NaN
Q9JMG1	56	Q9JMG1	Q9JMG1	Endothelial differentiation-related factor 1	Edf1	sp|Q9JMG1|EDF1_MOUSE Endothelial differentiation-related factor 1 OS=Mus musculus GN=Edf1 PE=1 SV=1	0.999913	40.6189	0.0198657	66.056	49.918	66.056					0.999913	40.6189	0.0198657	66.056		1	K	SKKWAAGQNKQHSITKNTAKLDRETEELHHD	X;X;X;X;X;X;X;X;X;X;X;X;X;X;X;Lactic acid;X;X;X;X;X;X;X;X;X;X;X;X;X;X;X	XXXXXXXXXXPPPPPPPPPPXXXXXXXXXXX	QHSITK(1)NTAK	QHSITK(40.62)NTAK(-40.62)	6	3	0.35287	416520	416520	0	0	NaN	0	416520	NaN	NaN	0	0	0	416520	0	0	NaN	NaN	NaN
Q9QXT8	5	Q9QXT8	Q9QXT8	Calsenilin	Kcnip3	sp|Q9QXT8|CSEN_MOUSE Calsenilin OS=Mus musculus GN=Kcnip3 PE=1 SV=2	1	43.5437	0.0265142	43.544	12.716	43.544					1	43.5437	0.0265142	43.544		2	K	___________MQRTKEAVKASDGNLLGDPG	X;X;X;X;X;X;X;X;X;X;X;X;X;X;X;Lactic acid;X;X;X;Lactic acid;X;X;X;X;X;X;X;X;X;X;X	XXXXXXXXXXXXXXPPPPPPPPPPPPPPPPP	TK(1)EAVK(1)ASDGNLLGDPGR	TK(43.54)EAVK(43.54)ASDGNLLGDPGR	2	2	2.2113	1379100	0	1379100	0	NaN	0	1379100	NaN	NaN	0	0	0	0	1379100	0	NaN	NaN	NaN
Q9QXT8	9	Q9QXT8	Q9QXT8	Calsenilin	Kcnip3	sp|Q9QXT8|CSEN_MOUSE Calsenilin OS=Mus musculus GN=Kcnip3 PE=1 SV=2	1	43.5437	0.0265142	43.544	12.716	43.544					1	43.5437	0.0265142	43.544		2	K	_______MQRTKEAVKASDGNLLGDPGRIPL	X;X;X;X;X;X;X;X;X;X;X;Lactic acid;X;X;X;Lactic acid;X;X;X;X;X;X;X;X;X;X;X;X;X;X;X	XXXXXXXXXXPPPPPPPPPPPPPPPPPPXXX	TK(1)EAVK(1)ASDGNLLGDPGR	TK(43.54)EAVK(43.54)ASDGNLLGDPGR	6	2	2.2113	1379100	0	1379100	0	NaN	0	1379100	NaN	NaN	0	0	0	0	1379100	0	NaN	NaN	NaN
Q9QZZ4	7	Q9QZZ4	Q9QZZ4	Unconventional myosin-XV	Myo15a	sp|Q9QZZ4|MYO15_MOUSE Unconventional myosin-XV OS=Mus musculus GN=Myo15a PE=1 SV=2	0.830664	9.17231	0.0270099	75.854	14.893	75.854	0.830664	9.17231	0.0270099	75.854						1	K	_________MADEEKKAKKGKKGKKAPEPEK	X;X;X;X;X;X;X;X;X;X;X;X;X;X;X;Lactic acid;X;X;X;X;X;X;X;X;X;X;X;X;X;X;X	XXXXXXXXXXPPPPPPPPXXXXXXXXXXXXX	ADEEK(0.069)K(0.831)AK(0.101)	ADEEK(-10.82)K(9.17)AK(-9.17)	6	2	-0.87749	3954100	3954100	0	0	NaN	3954100	0	NaN	NaN	3954100	0	0	0	0	0	NaN	NaN	NaN
Q9R190	533	Q9R190	Q9R190	Metastasis-associated protein MTA2	Mta2	sp|Q9R190|MTA2_MOUSE Metastasis-associated protein MTA2 OS=Mus musculus GN=Mta2 PE=1 SV=1	0.838869	7.16517	0.00589436	62.378	47.817	62.378					0.838869	7.16517	0.00589436	62.378		1	K	ATIVKDLVAQAPLKPKTPRGTKTPINRNQLT	X;X;X;X;X;X;X;X;X;X;X;X;X;X;X;Lactic acid;X;X;X;X;X;Lactic acid;X;X;X;X;X;X;X;X;X	XXXXXPPPPPPPPPPPPPPXXXXXXXXXXXX	DLVAQAPLK(0.161)PK(0.839)TPR	DLVAQAPLK(-7.17)PK(7.17)TPR	11	3	-0.056519	3544100	3544100	0	0	NaN	0	3544100	NaN	NaN	0	0	0	3544100	0	0	NaN	NaN	NaN
Q9R190	539	Q9R190	Q9R190	Metastasis-associated protein MTA2	Mta2	sp|Q9R190|MTA2_MOUSE Metastasis-associated protein MTA2 OS=Mus musculus GN=Mta2 PE=1 SV=1	1	104.366	0.0190037	104.37	52.348	104.37					1	104.366	0.0190037	104.37		1	K	LVAQAPLKPKTPRGTKTPINRNQLTQNRGLG	X;X;X;X;X;X;X;X;X;Lactic acid;X;X;X;X;X;Lactic acid;X;X;X;X;X;X;X;X;X;X;X;X;X;X;X	XXXXXXXXXXXXXPPPPPPPPXXXXXXXXXX	GTK(1)TPINR	GTK(104.37)TPINR	3	2	0.10463	11937000	11937000	0	0	NaN	0	11937000	NaN	NaN	0	0	0	11937000	0	0	NaN	NaN	NaN
Q9Z103	605	Q9Z103	Q9Z103	Activity-dependent neuroprotector homeobox protein	Adnp	sp|Q9Z103|ADNP_MOUSE Activity-dependent neuroprotector homeobox protein OS=Mus musculus GN=Adnp PE=1 SV=2	0.999994	51.9699	0.00298809	75.088	60.115	75.088					0.999994	51.9699	0.00298809	75.088		1	K	PKPQPKVQEKADVPVKSSPQAAVPYKKDVGK	X;X;X;X;X;X;X;X;X;X;X;X;X;X;X;Lactic acid;X;X;X;X;X;X;X;X;X;X;X;X;X;X;X	XXXXXXXXXXPPPPPPPPPPPPPPPPXXXXX	ADVPVK(1)SSPQAAVPYK	ADVPVK(51.97)SSPQAAVPYK(-51.97)	6	2	-0.14246	1137500	1137500	0	0	NaN	0	1137500	NaN	NaN	0	0	0	1137500	0	0	NaN	NaN	NaN
Q9Z103	728	Q9Z103	Q9Z103	Activity-dependent neuroprotector homeobox protein	Adnp	sp|Q9Z103|ADNP_MOUSE Activity-dependent neuroprotector homeobox protein OS=Mus musculus GN=Adnp PE=1 SV=2	0.607086	1.88953	0.0164234	86.953	60.351	86.953					0.607086	1.88953	0.0164234	86.953		1	K	PVKRTYEQMEFPLLKKRKLEEDADSPSCFEE	X;X;X;X;X;X;X;X;X;X;X;X;X;X;X;Lactic acid;X;X;X;X;X;X;X;X;X;X;X;X;X;X;X	XXXXXXXPPPPPPPPPXXXXXXXXXXXXXXX	QMEFPLLK(0.393)K(0.607)	QMEFPLLK(-1.89)K(1.89)	9	2	-2.109	1466100	1466100	0	0	NaN	0	1466100	NaN	NaN	0	0	0	1466100	0	0	NaN	NaN	NaN
Q9Z204	8	Q9Z204	Q9Z204	Heterogeneous nuclear ribonucleoproteins C1/C2	Hnrnpc	sp|Q9Z204|HNRPC_MOUSE Heterogeneous nuclear ribonucleoproteins C1/C2 OS=Mus musculus GN=Hnrnpc PE=1 SV=1	1	145.886	9.50602e-06	145.89	103.14	145.89	1	94.6921	0.000255407	94.692	1	145.886	9.50602e-06	145.89		1	K	________MASNVTNKTDPRSMNSRVFIGNL	X;X;X;X;X;X;X;X;X;X;X;X;X;X;X;Lactic acid;X;X;X;X;X;X;X;X;X;X;X;X;X;X;X	XXXXXXXXXPPPPPPPPPPPXXXXXXXXXXX	ASNVTNK(1)TDPR	ASNVTNK(145.89)TDPR	7	2	0.85378	10483000	10483000	0	0	NaN	4321300	6161400	NaN	NaN	4321300	0	0	6161400	0	0	NaN	NaN	NaN
Q9Z204	176	Q9Z204	Q9Z204	Heterogeneous nuclear ribonucleoproteins C1/C2	Hnrnpc	sp|Q9Z204|HNRPC_MOUSE Heterogeneous nuclear ribonucleoproteins C1/C2 OS=Mus musculus GN=Hnrnpc PE=1 SV=1	1	146.693	0.000609698	146.69	89.516	146.69	1	85.7306	0.0151923	85.731	1	146.693	0.000609698	146.69		1	K	VSGNTSRRGKSGFNSKSGQRGSSSKSGKLKG	X;X;X;X;X;X;X;X;X;X;X;X;X;X;X;Lactic acid;X;X;X;X;X;X;X;X;X;X;X;X;X;X;X	XXXXXXXXXXPPPPPPPPPPXXXXXXXXXXX	SGFNSK(1)SGQR	SGFNSK(146.69)SGQR	6	2	0.11752	8907900	8907900	0	0	NaN	900030	8007800	NaN	NaN	900030	0	0	8007800	0	0	NaN	NaN	NaN
Q9Z2D8	42	Q9Z2D8	Q9Z2D8	Methyl-CpG-binding domain protein 3	Mbd3	sp|Q9Z2D8|MBD3_MOUSE Methyl-CpG-binding domain protein 3 OS=Mus musculus GN=Mbd3 PE=1 SV=1	0.594127	1.65489	0.00278755	90.15	60.774	90.15					0.594127	1.65489	0.00278755	90.15		1	K	SAGHRDVFYYSPSGKKFRSKPQLARYLGGSM	X;X;X;X;X;X;X;X;X;X;X;X;X;X;X;Lactic acid;X;X;X;X;X;X;X;X;X;X;X;X;X;X;X	XXXXXPPPPPPPPPPPXXXXXXXXXXXXXXX	DVFYYSPSGK(0.406)K(0.594)	DVFYYSPSGK(-1.65)K(1.65)	11	2	-0.67196	2316800	2316800	0	0	NaN	0	2316800	NaN	NaN	0	0	0	2316800	0	0	NaN	NaN	NaN
Q9Z2U0;Q9CWH6	52;54	Q9Z2U0	Q9Z2U0	Proteasome subunit alpha type-7;Proteasome subunit alpha type-7-like	Psma7;Psma8	sp|Q9Z2U0|PSA7_MOUSE Proteasome subunit alpha type-7 OS=Mus musculus GN=Psma7 PE=1 SV=1;sp|Q9CWH6|PSA7L_MOUSE Proteasome subunit alpha type-7-like OS=Mus musculus GN=Psma8 PE=1 SV=1	1	76.2215	0.0312872	76.221	20.852	76.221					1	76.2215	0.0312872	76.221		1	K	GKDIVVLGVEKKSVAKLQDERTVRKICALDD	X;X;X;X;X;X;X;X;X;X;X;X;X;X;X;Lactic acid;X;X;X;X;X;X;X;X;X;X;X;X;X;X;X	XXXXXXXXXXXXPPPPPPPPPXXXXXXXXXX	SVAK(1)LQDER	SVAK(76.22)LQDER	4	2	-0.64017	3120800	3120800	0	0	NaN	0	3120800	NaN	NaN	0	0	0	3120800	0	0	NaN	NaN	NaN
Q9Z2X1;J3QM80	224;224	Q9Z2X1	Q9Z2X1	Heterogeneous nuclear ribonucleoprotein F;Heterogeneous nuclear ribonucleoprotein F, N-terminally processed	Hnrnpf	sp|Q9Z2X1|HNRPF_MOUSE Heterogeneous nuclear ribonucleoprotein F OS=Mus musculus GN=Hnrnpf PE=1 SV=3;tr|J3QM80|J3QM80_MOUSE Heterogeneous nuclear ribonucleoprotein F (Fragment) OS=Mus musculus GN=Hnrnpf PE=1 SV=8	1	64.0402	0.0163307	64.04	41.3	64.04					1	64.0402	0.0163307	64.04			K	PYDRPGTARRYIGIVKQAGLDRMRSGAYSAG	X;X;X;X;X;X;X;X;X;X;X;X;X;X;X;Lactic acid;X;X;X;X;X;X;X;X;X;X;X;X;X;X;X	XXXXXXXXXXPPPPPPPPPPPPXXXXXXXXX	YIGIVK(1)QAGLDR	YIGIVK(64.04)QAGLDR	6	2	2.2962	761130	761130	0	0	NaN	0	761130	NaN	NaN	0	0	0	761130	0	0	NaN	NaN	NaN
[truncated: 25 more columns]
